# Supplementary material for: CIN-like TCP13 is essential for plant growth regulation under dehydration stress
Source: Plant Mol Biol. 2022 Jan 20;108(3):257–75. doi: 10.1007/s11103-021-01238-5 (PMC8873074; doi:10.1007/s11103-021-01238-5)
Supplement: Supplementary file 6 — Supplementary file6 (XLSX 451 kb) [file 11103_2021_1238_MOESM6_ESM.xlsx]

## Sheet: Sheet1
Table S4. Promoter analyses of genes down-regulated in TCP13pro:TCP13SRDX transgenic plants.
Motif sequence (forward strand)	Motif sequence (reverse strand)	No. of motifs detected in promoters of genes down-regulated in TCP13pro:TCP13SRDX plants	No. of motifs detected in 100 randomly selected genes	Standard deviation (SD)	Fold change (FC)	Z score	p-value	Motif nname
GGACCA	TGGTCC	39	13.1133	3.7235	2.97407	6.95224	0	TCP Binding Site
ACGTGT	ACACGT	50	21.5777	4.96765	2.31721	5.72149	1.05596e-08	ABRE/QAR
TGGTCC	GGACCA	33	13.1543	3.63954	2.50868	5.45279	4.95848e-08	TCP Binding Site
CAACGT	ACGTTG	36	14.602	4.05205	2.46542	5.28079	1.28628e-07	OsBP-5 binding site
GCCACG	CGTGGC	24	8.62633	3.03817	2.78218	5.06018	4.18859e-07	ABRE/hex3
AGGACC	GGTCCT	22	7.64167	2.85412	2.87895	5.03075	4.88575e-07	TCP Binding Site
TCACCT	AGGTGA	36	16.5423	4.13407	2.17623	4.70666	2.51813e-06	unknown
CCACGT	ACGTGG	36	15.8413	4.35161	2.27254	4.63247	3.61335e-06	ABRE
ATGGTA	TACCAT	47	24.2067	4.92437	1.94161	4.62868	3.67996e-06	S1F box
CGTGTG	CACACG	25	10.5327	3.38961	2.37357	4.26815	1.97104e-05	unknown
GTGATG	CATCAC	45	23.449	5.17175	1.91906	4.16706	3.0855e-05	unknown
ACACGT	ACGTGT	41	20.9947	4.81107	1.95288	4.15819	3.20777e-05	ABRE/QAR
ATAGTC	GACTAT	39	19.7667	4.64637	1.97302	4.13943	3.48166e-05	unknown
GGTCCA	TGGACC	28	13.6693	3.57495	2.04838	4.00864	6.10704e-05	unknown
GTATGG	CCATAC	25	11.3793	3.46941	2.19697	3.92594	8.63935e-05	unknown
ACGTAG	CTACGT	22	9.53067	3.21276	2.30834	3.88119	0.000103947	unknown
CGTAGT	ACTACG	19	7.841	2.88337	2.42316	3.87012	0.00010878	unknown
CACGTG	CACGTG	45	22.2917	5.88859	2.01869	3.85633	0.000115103	Gbox
ACAAAA	TTTTGT	220	161.926	15.3414	1.35864	3.78542	0.000153449	unknown
AACCTA	TAGGTT	46	26.3377	5.20974	1.74655	3.77415	0.000160554	unknown
CGTACA	TGTACG	22	9.844	3.26464	2.23486	3.72353	0.000196454	unknown
TTCTAG	CTAGAA	42	23.9883	4.85174	1.75085	3.71241	0.000205292	unknown
GTACAA	TTGTAC	42	24.3793	4.9743	1.72277	3.54234	0.000396595	unknown
GGGACC	GGTCCC	15	5.79467	2.6478	2.58859	3.4766	0.000507819	Site IIb
TATATG	CATATA	92	60.504	9.0841	1.52056	3.46716	0.000525993	unknown
GACCGT	ACGGTC	17	7.55533	2.74265	2.25007	3.44363	0.000573956	unknown
TACACG	CGTGTA	24	12.0243	3.60353	1.99595	3.32332	0.000889532	unknown
TCTCCC	GGGAGA	32	17.5487	4.34871	1.8235	3.32313	0.000890128	unknown
ACCTAA	TTAGGT	46	28.193	5.36656	1.63161	3.31814	0.000906199	unknown
TAGTCA	TGACTA	43	25.698	5.23596	1.67328	3.30446	0.000951607	unknown
CTATAC	GTATAG	32	18.33	4.21351	1.74577	3.24432	0.0011773	unknown
TTACAC	GTGTAA	44	27.0937	5.22653	1.624	3.23471	0.00121766	unknown
TCTAGA	TCTAGA	42	25.2457	5.19503	1.66365	3.22507	0.00125941	unknown
CACGTA	TACGTG	24	12.101	3.70496	1.98331	3.21164	0.00131978	ABRE/Gbox
GGCATT	AATGCC	25	12.7803	3.83079	1.95613	3.18985	0.00142345	unknown
ATAGAA	TTCTAT	80	54.007	8.15081	1.48129	3.18901	0.00142763	unknown
ATATGT	ACATAT	90	60.617	9.25384	1.48473	3.17522	0.00149721	unknown
AAACGT	ACGTTT	48	30.3447	5.63298	1.58183	3.13428	0.00172276	unknown
ACGTAC	GTACGT	23	11.274	3.77311	2.04009	3.10778	0.00188496	ABRE
ACCACG	CGTGGT	18	8.93633	2.92206	2.01425	3.1018	0.00192346	unknown
AAATAC	GTATTT	82	57.1487	8.02621	1.43485	3.09627	0.0019597	unknown
TACATA	TATGTA	80	54.2827	8.31415	1.47377	3.0932	0.00198011	unknown
TCTATC	GATAGA	43	26.696	5.27423	1.61073	3.09126	0.00199312	unknown
GTCCAC	GTGGAC	22	11.481	3.41119	1.91621	3.08368	0.00204458	unknown
TAATTA	TAATTA	157	114.278	13.8904	1.37384	3.07565	0.00210047	unknown
AAATTG	CAATTT	110	79.7593	9.85629	1.37915	3.06816	0.00215382	unknown
ATACAC	GTGTAT	47	29.6327	5.74277	1.58609	3.02421	0.00249284	unknown
CCACAT	ATGTGG	38	23.236	4.88395	1.63539	3.02297	0.0025031	unknown
TATGGT	ACCATA	43	26.8577	5.40782	1.60103	2.985	0.00283579	unknown
ATATAT	ATATAT	300	200.004	33.5062	1.49997	2.98442	0.0028412	unknown
AACGTA	TACGTT	32	19.1267	4.31364	1.67306	2.98433	0.00284198	GARE
ACTACC	GGTAGT	20	10.2997	3.28727	1.94181	2.95088	0.00316871	unknown
TCTAGC	GCTAGA	22	11.6953	3.50085	1.88109	2.94348	0.00324547	unknown
TCGGGT	ACCCGA	18	8.37367	3.27133	2.1496	2.94263	0.00325432	unknown
CACCCG	CGGGTG	10	4.00367	2.04443	2.49771	2.933	0.003357	unknown
AGTATA	TATACT	58	39.328	6.37013	1.47478	2.93118	0.00337679	unknown
CATTTT	AAAATG	131	95.6763	12.2014	1.3692	2.89506	0.00379086	unknown
ATACGT	ACGTAT	30	17.0977	4.47454	1.75463	2.8835	0.0039328	ABRE
GTATAA	TTATAC	58	39.425	6.45644	1.47115	2.87697	0.0040151	unknown
GGTAGG	CCTACC	15	7.082	2.77822	2.11805	2.85002	0.00437158	P (myb homolog) binding site
ATTAAG	CTTAAT	63	43.9503	6.70424	1.43344	2.84144	0.0044911	unknown
AATATA	TATATT	162	113.611	17.1262	1.42592	2.82546	0.00472129	unknown
TATCCA	TGGATA	47	30.8053	5.73734	1.52571	2.82268	0.00476243	amylase box/TATCCA element/TATCCAC box
ATACGC	GCGTAT	15	7.45933	2.68131	2.0109	2.81231	0.00491871	unknown
TATTTA	TAAATA	150	107.553	15.0965	1.39466	2.81168	0.00492835	unknown
GTGCAC	GTGCAC	14	6.52033	2.70703	2.14713	2.76305	0.00572641	unknown
ATATAC	GTATAT	77	54.5923	8.14233	1.41045	2.752	0.00592332	unknown
CAGGAC	GTCCTG	13	6.13467	2.49999	2.1191	2.74614	0.00603002	unknown
CGTGTC	GACACG	22	12.1757	3.61937	1.80688	2.71438	0.00664007	ABRE/CE3
TAGAAA	TTTCTA	96	70.4303	9.426	1.36305	2.71267	0.00667426	unknown
ACCTAT	ATAGGT	27	16.3503	3.94505	1.65134	2.6995	0.00694442	unknown
CAAAAA	TTTTTG	202	155.249	17.3782	1.30113	2.69018	0.00714125	unknown
ATCACC	GGTGAT	32	19.88	4.52221	1.60966	2.6801	0.00735994	unknown
CCCGCT	AGCGGG	8	3.23433	1.78675	2.47346	2.66722	0.00764811	BS1
TCTATA	TATAGA	70	49.0363	7.86539	1.42751	2.66531	0.00769181	unknown
GTAGCT	AGCTAC	24	13.9357	3.80566	1.7222	2.64457	0.00817943	unknown
AACGTG	CACGTT	26	15.584	3.98467	1.66838	2.61402	0.00894837	OsBP-5 binding site/QAR/T_G-box
CCTAAT	ATTAGG	42	27.7463	5.4604	1.51371	2.61037	0.00904437	unknown
TACGTG	CACGTA	23	12.8133	3.95268	1.79501	2.57715	0.00996179	ABRE/Gbox
CAAATT	AATTTG	121	92.382	11.1394	1.30978	2.56907	0.0101971	unknown
ATACTA	TAGTAT	57	39.889	6.68353	1.42897	2.56017	0.010462	unknown
CTAACA	TGTTAG	40	26.814	5.15851	1.49176	2.55616	0.0105834	unknown
CCTATA	TATAGG	31	19.4977	4.50778	1.58993	2.55166	0.0107211	unknown
ACGTGG	CCACGT	28	16.2893	4.59086	1.71892	2.55087	0.0107455	ABRE
TACACA	TGTGTA	53	37.075	6.25506	1.42953	2.54594	0.0108984	SPBF binding site
TACAAA	TTTGTA	103	79.3143	9.32912	1.29863	2.5389	0.0111203	unknown
CATCGG	CCGATG	15	7.81067	2.83281	1.92045	2.53788	0.0111527	unknown
CGATAT	ATATCG	27	16.6353	4.08973	1.62305	2.53431	0.0112668	unknown
ACAAAT	ATTTGT	115	88.6913	10.4042	1.29663	2.52865	0.0114502	unknown
TGGTAA	TTACCA	46	31.452	5.7579	1.46255	2.52662	0.0115167	unknown
TGTGGT	ACCACA	35	22.679	4.88521	1.54328	2.5221	0.0116655	unknown
ACACAT	ATGTGT	61	43.5087	6.95078	1.40202	2.51646	0.0118542	unknown
CTCTAT	ATAGAG	46	31.2903	5.85703	1.4701	2.51145	0.0120235	unknown
AAATTT	AAATTT	219	161.024	23.1094	1.36005	2.50876	0.0121156	unknown
GTACGT	ACGTAC	21	11.3273	3.86081	1.85392	2.50535	0.0122331	ABRE
TAAATA	TATTTA	160	116.363	17.426	1.37501	2.50416	0.0122744	unknown
ACATAC	GTATGT	41	27.1523	5.56088	1.51	2.49019	0.0127674	unknown
GTCCTT	AAGGAC	24	14.5503	3.79661	1.64945	2.48897	0.0128113	unknown
TATACA	TGTATA	75	55.2033	7.96169	1.35861	2.48649	0.012901	unknown
CTGGTC	GACCAG	17	9.26067	3.11501	1.83572	2.48453	0.0129723	unknown
AGTGAC	GTCACT	26	15.8273	4.10915	1.64273	2.47561	0.0133008	unknown
TGTAGG	CCTACA	20	11.379	3.48503	1.75762	2.47373	0.0133712	unknown
CCAAAA	TTTTGG	119	92.35	10.7786	1.28858	2.47248	0.0134177	unknown
TAGGAC	GTCCTA	16	8.64567	2.98269	1.85064	2.46568	0.0136755	unknown
GGCATA	TATGCC	17	9.518	3.03767	1.78609	2.46307	0.0137751	unknown
ATAGGT	ACCTAT	25	15.3833	3.91171	1.62514	2.45843	0.0139546	unknown
AAATAT	ATATTT	207	149.821	23.289	1.38165	2.45521	0.0140802	EE
GTGGTA	TACCAC	22	13.1903	3.6008	1.66789	2.44659	0.0144216	unknown
CATATA	TATATG	88	65.1867	9.33003	1.34997	2.44515	0.0144792	unknown
TATATC	GATATA	63	45.9977	7.00805	1.36963	2.42612	0.0152614	unknown
GTATAT	ATATAC	73	54.0803	7.80198	1.34984	2.42498	0.0153091	unknown
AACAAA	TTTGTT	199	161.399	15.568	1.23297	2.41528	0.015723	amylase box/GARE/TAACAAA box
TATATA	TATATA	272	196.149	31.564	1.3867	2.40309	0.0162573	TATA
GTGGTC	GACCAC	20	11.4713	3.55097	1.74348	2.40179	0.0163153	unknown
CTATAT	ATATAG	71	51.522	8.12331	1.37805	2.39779	0.0164943	TATA
TATCAC	GTGATA	37	24.7003	5.14088	1.49796	2.39252	0.0167331	unknown
AAAAAT	ATTTTT	286	211.701	31.0923	1.35096	2.38963	0.0168654	unknown
ACTATA	TATAGT	63	45.1997	7.48615	1.39382	2.37777	0.0174178	unknown
CGTTCA	TGAACG	18	10.4557	3.17512	1.72155	2.37608	0.0174978	unknown
CTCCCC	GGGGAG	12	5.954	2.55488	2.01545	2.36646	0.0179594	unknown
AATAGA	TCTATT	69	49.6757	8.18609	1.38901	2.36063	0.018244	unknown
AAAATG	CATTTT	121	96.9057	10.2557	1.24864	2.34936	0.018806	unknown
CGTATT	AATACG	25	15.825	3.92091	1.57978	2.34002	0.0192827	unknown
AATATG	CATATT	75	55.0767	8.51471	1.36174	2.33987	0.0192903	unknown
CACGTT	AACGTG	22	13.3963	3.6952	1.64224	2.32834	0.0198941	OsBP-5 binding site/QAR/T_G-box
GAGGAC	GTCCTC	17	9.65233	3.15723	1.76123	2.32725	0.019952	unknown
TCTAAC	GTTAGA	37	25.1863	5.079	1.46905	2.32598	0.0200194	unknown
CCGTTC	GAACGG	12	6.22533	2.48555	1.92761	2.3233	0.0201632	unknown
CACGAG	CTCGTG	19	11.2937	3.3188	1.68236	2.32202	0.0202316	unknown
CTATAG	CTATAG	26	16.6013	4.06685	1.56614	2.31105	0.0208304	unknown
TGCACG	CGTGCA	11	5.56367	2.35679	1.97711	2.30667	0.0210734	unknown
ATAGTA	TACTAT	56	39.627	7.12845	1.41318	2.29685	0.0216272	unknown
ATTTAT	ATAAAT	157	119.528	16.3266	1.3135	2.29512	0.0217261	unknown
AGGACG	CGTCCT	12	6.15467	2.55256	1.94974	2.28998	0.0220222	unknown
TTCCAC	GTGGAA	39	26.4037	5.50934	1.47707	2.28636	0.0222332	unknown
CACCTA	TAGGTG	21	12.6237	3.66404	1.66354	2.28609	0.0222488	unknown
GTGTAT	ATACAC	40	27.9413	5.28727	1.43157	2.2807	0.0225663	unknown
TTACTC	GAGTAA	39	26.5783	5.47618	1.46736	2.26831	0.0233104	unknown
CCGTAA	TTACGG	18	10.5187	3.29858	1.71124	2.26805	0.0233262	unknown
CTTTAG	CTAAAG	39	27.4127	5.12502	1.4227	2.26094	0.0237632	unknown
GTGGGA	TCCCAC	22	13.2767	3.85916	1.65704	2.26043	0.0237949	Box C
TTGGAC	GTCCAA	33	22.202	4.77802	1.48635	2.25993	0.0238255	unknown
AATAAT	ATTATT	170	130.725	17.404	1.30044	2.25667	0.0240288	unknown
TTTATA	TATAAA	147	110.368	16.2591	1.3319	2.253	0.0242594	unknown
ACCCAC	GTGGGT	22	13.456	3.79643	1.63496	2.25054	0.0244149	unknown
CTCCCG	CGGGAG	9	4.38133	2.05475	2.05417	2.2478	0.0245889	unknown
ATATCT	AGATAT	72	55.1497	7.53531	1.30554	2.23618	0.0253397	EE
AATTAA	TTAATT	173	134.935	17.0368	1.2821	2.23429	0.0254642	unknown
CTAGCG	CGCTAG	8	3.67367	1.94227	2.17766	2.22746	0.0259167	unknown
CTATCT	AGATAG	36	24.5157	5.15926	1.46845	2.22597	0.0260165	unknown
TATCTC	GAGATA	49	35.6193	6.02449	1.37566	2.22104	0.026348	unknown
ATTAAT	ATTAAT	137	106.981	13.5657	1.2806	2.21287	0.0269069	unknown
ACATAT	ATATGT	86	65.3643	9.3392	1.3157	2.20958	0.0271347	unknown
CATACG	CGTATG	16	9.02	3.16032	1.77384	2.20864	0.0271997	unknown
ATAATA	TATTAT	141	105.474	16.087	1.33682	2.20836	0.0272191	unknown
CTAATA	TATTAG	56	41.1357	6.73511	1.36135	2.20699	0.0273146	cytokinin-enhanced binding
ACGTTT	AAACGT	40	28.2577	5.32373	1.41555	2.20566	0.0274078	unknown
GACCAC	GTGGTC	20	12.3593	3.48907	1.61821	2.18989	0.0285324	unknown
ATCCAT	ATGGAT	50	36.6903	6.12375	1.36276	2.17345	0.0297463	amylase box
AATAGT	ACTATT	62	45.5227	7.58125	1.36196	2.17343	0.0297477	unknown
CAAACG	CGTTTG	29	19.1777	4.53207	1.51218	2.1673	0.0302122	unknown
ACTAAC	GTTAGT	35	23.8703	5.15833	1.46626	2.15761	0.0309582	Myb1
ATAACG	CGTTAT	27	17.813	4.26248	1.51575	2.15532	0.031137	unknown
TAGTCG	CGACTA	15	8.555	2.99566	1.75336	2.15145	0.0314409	unknown
AATAAC	GTTATT	73	53.6857	8.98861	1.35977	2.14876	0.0316537	unknown
TCGGCC	GGCCGA	10	5.07867	2.29265	1.96902	2.14657	0.0318273	unknown
CCACCC	GGGTGG	12	6.372	2.62283	1.88324	2.14577	0.0318911	CE1
ATAAAT	ATTTAT	172	131.878	18.6989	1.30424	2.14571	0.0318964	unknown
GACGTG	CACGTC	18	10.656	3.42378	1.68919	2.145	0.0319528	unknown
TCATAG	CTATGA	32	22.0703	4.64513	1.44991	2.13765	0.0325451	unknown
TCATTT	AAATGA	103	80.8217	10.4169	1.27441	2.12907	0.0332485	unknown
CAATTA	TAATTG	70	53.315	7.8414	1.31295	2.12781	0.033353	unknown
TATTAA	TTAATA	117	88.327	13.4928	1.32462	2.12506	0.0335819	unknown
CGTACG	CGTACG	12	6.37133	2.65439	1.88344	2.12051	0.033963	unknown
CTCTCC	GGAGAG	35	23.763	5.3058	1.47288	2.11787	0.0341861	unknown
GCCTAT	ATAGGC	18	11.0287	3.29314	1.63211	2.11692	0.0342663	unknown
TATATT	AATATA	149	111.797	17.5752	1.33277	2.11679	0.0342778	unknown
TTTAGG	CCTAAA	43	30.2603	6.02877	1.421	2.11315	0.0345882	unknown
ACCATT	AATGGT	51	37.254	6.51257	1.36898	2.11069	0.0347993	unknown
TTCACC	GGTGAA	35	24.4343	5.0096	1.43241	2.10909	0.0349372	unknown
CGATAC	GTATCG	14	8.04833	2.823	1.73949	2.10828	0.0350069	unknown
CGGACT	AGTCCG	10	5.04733	2.34967	1.98124	2.10782	0.0350468	unknown
ACATCA	TGATGT	53	39.1527	6.60135	1.35368	2.09765	0.0359361	unknown
TGAGTG	CACTCA	25	16.2427	4.17599	1.53916	2.09707	0.0359878	unknown
TAGATT	AATCTA	68	51.652	7.80136	1.3165	2.09553	0.0361237	unknown
CACGCC	GGCGTG	8	3.85867	1.9836	2.07326	2.08779	0.0368171	unknown
AATTGT	ACAATT	77	58.9163	8.67689	1.30694	2.08412	0.0371494	unknown
AACGTT	AACGTT	37	26.3543	5.11672	1.40394	2.08056	0.0374738	Tbox
TCGTAT	ATACGA	27	17.9437	4.38066	1.50471	2.06734	0.0387019	unknown
ATACGA	TCGTAT	29	19.7343	4.48536	1.46952	2.06576	0.0388514	unknown
GCATAA	TTATGC	32	22.25	4.72972	1.4382	2.06143	0.0392619	unknown
CTATTT	AAATAG	72	55.1343	8.22611	1.3059	2.05026	0.040339	unknown
TATAGA	TCTATA	58	43.5443	7.05124	1.33198	2.05009	0.0403557	unknown
AATTGA	TCAATT	86	68.0243	8.77371	1.26425	2.04881	0.0404808	unknown
ATATTT	AAATAT	193	147.628	22.1538	1.30734	2.04803	0.040557	EE
GACCCC	GGGGTC	9	4.62467	2.14895	1.94609	2.03603	0.0417473	unknown
AAGTGA	TCACTT	50	37.474	6.1656	1.33426	2.03159	0.0421948	unknown
TAATAT	ATATTA	123	94.089	14.2346	1.30727	2.03104	0.0422513	unknown
TTCGGG	CCCGAA	12	6.417	2.74984	1.87003	2.0303	0.0423262	unknown
ACGTGC	GCACGT	13	7.05667	2.9274	1.84223	2.03025	0.0423315	unknown
ACACCC	GGGTGT	12	6.58833	2.67056	1.8214	2.02641	0.0427224	unknown
CATCCA	TGGATG	32	22.3297	4.77255	1.43307	2.02624	0.0427402	unknown
TAATAA	TTATTA	146	113.677	15.9663	1.28434	2.02445	0.0429235	unknown
ATACCA	TGGTAT	37	26.31	5.28847	1.40631	2.02138	0.0432405	S1F box
AGGGCT	AGCCCT	11	6.03867	2.4549	1.82159	2.021	0.0432802	unknown
GTGGCA	TGCCAC	20	12.7957	3.57745	1.56303	2.01382	0.0440289	ABRE
CGGCCA	TGGCCG	11	5.37567	2.79305	2.04626	2.01369	0.0440424	unknown
TCCACG	CGTGGA	19	11.9503	3.50941	1.58991	2.00879	0.0445596	unknown
CACATC	GATGTG	32	22.1637	4.899	1.4438	2.00782	0.044662	unknown
GACAAA	TTTGTC	70	54.5847	7.69597	1.28241	2.00304	0.0451729	unknown
CGTCAC	GTGACG	17	10.171	3.4112	1.67142	2.00193	0.0452919	unknown
GTATTT	AAATAC	69	53.249	7.8912	1.2958	1.99602	0.0459317	unknown
GAGTTA	TAACTC	34	23.75	5.14862	1.43158	1.99082	0.0465004	unknown
AAAAAA	TTTTTT	604	482.378	61.0963	1.25213	1.99066	0.0465183	unknown
ATCGGC	GCCGAT	11	5.90733	2.56676	1.86209	1.98408	0.0472468	unknown
AAAATA	TATTTT	256	196.464	30.077	1.30304	1.97946	0.0477638	EE
TAGGGA	TCCCTA	18	11.3903	3.3464	1.58029	1.97516	0.0482501	unknown
AATACG	CGTATT	24	16.2183	3.9462	1.47981	1.97194	0.0486167	unknown
TAGGTT	AACCTA	33	23.1943	4.98513	1.42276	1.96698	0.0491851	unknown
ATCAAT	ATTGAT	83	65.8123	8.74254	1.26116	1.96598	0.0493007	unknown
CACCCA	TGGGTG	18	11.1077	3.50649	1.6205	1.96559	0.0493459	unknown
TAGTGC	GCACTA	13	7.56067	2.76939	1.71943	1.96409	0.0495199	unknown
TACCTA	TAGGTA	24	16.0943	4.02619	1.49121	1.96356	0.0495809	unknown
TACCAC	GTGGTA	23	15.318	3.91552	1.5015	1.96193	0.0497701	unknown
ACGTTC	GAACGT	15	9.15133	2.98464	1.63911	1.95959	0.0500438	unknown
CCACAA	TTGTGG	42	31.1327	5.57471	1.34907	1.9494	0.0512479	unknown
CTCGAC	GTCGAG	14	8.333	2.91014	1.68007	1.94733	0.0514956	unknown
TAGTAT	ATACTA	51	38.3103	6.53066	1.33123	1.94309	0.0520053	unknown
ACCCCA	TGGGGT	19	11.913	3.64809	1.5949	1.94266	0.052057	unknown
TACCCT	AGGGTA	18	11.5233	3.33914	1.56205	1.93962	0.0524256	unknown
TATAGT	ACTATA	56	42.441	6.9922	1.31948	1.93916	0.0524817	unknown
CGACTC	GAGTCG	13	7.70633	2.73592	1.68692	1.93488	0.0530054	unknown
CACCAT	ATGGTG	32	22.3563	4.9953	1.43136	1.93055	0.0535389	unknown
TCTCCG	CGGAGA	23	14.999	4.14778	1.53344	1.92898	0.0537328	unknown
CCATAC	GTATGG	19	12.2163	3.51914	1.55529	1.92765	0.0538986	unknown
TAATAG	CTATTA	44	32.3857	6.02586	1.35863	1.92741	0.0539281	unknown
ACCCTC	GAGGGT	16	9.783	3.23575	1.63549	1.92135	0.0546878	unknown
AAAGTA	TACTTT	80	63.6703	8.50065	1.25647	1.92099	0.054733	unknown
GACATG	CATGTC	29	19.7153	4.83633	1.47094	1.91977	0.0548863	unknown
GTCAAT	ATTGAC	39	28.72	5.36158	1.35794	1.91735	0.055194	unknown
GGGACA	TGTCCC	15	9.092	3.08502	1.6498	1.91506	0.0554851	Site IIb
CCCACT	AGTGGG	20	12.9143	3.70543	1.54867	1.91224	0.0558458	unknown
TACGTA	TACGTA	29	19.4073	5.02784	1.49428	1.90791	0.0564028	Abox
TATCGC	GCGATA	12	7.03067	2.61381	1.70681	1.90118	0.057278	unknown
GGACAC	GTGTCC	14	8.14233	3.08803	1.71941	1.8969	0.0578418	unknown
TATACG	CGTATA	25	16.7577	4.34986	1.49185	1.89485	0.058112	unknown
TAGCTC	GAGCTA	21	13.967	3.71553	1.50354	1.89286	0.0583759	unknown
TACTAT	ATAGTA	51	38.0787	6.84023	1.33933	1.88902	0.0588891	unknown
CAAATA	TATTTG	93	74.1313	10.0364	1.25453	1.88003	0.0601045	unknown
TACGCA	TGCGTA	14	8.60467	2.87085	1.62702	1.87935	0.0601968	unknown
ACTCGA	TCGAGT	22	14.8823	3.78945	1.47826	1.87828	0.0603423	unknown
CTTATC	GATAAG	40	29.551	5.56552	1.35359	1.87745	0.0604563	I-box core motif
CAAAAT	ATTTTG	138	114.786	12.3862	1.20224	1.87421	0.0609018	unknown
ATTCTA	TAGAAT	52	39.1507	6.86263	1.3282	1.87236	0.0611564	unknown
TACTCG	CGAGTA	15	9.314	3.04168	1.61048	1.86936	0.0615726	unknown
GTAGGT	ACCTAC	16	10.0847	3.17619	1.58657	1.8624	0.062547	unknown
ATTTGA	TCAAAT	103	83.8453	10.3029	1.22845	1.85916	0.0630051	unknown
ATCTAG	CTAGAT	30	21.311	4.68426	1.40772	1.85494	0.0636052	unknown
TATCTA	TAGATA	53	40.4967	6.77377	1.30875	1.84585	0.0649146	unknown
CTAGTC	GACTAG	18	11.725	3.40479	1.53518	1.84299	0.0653299	unknown
ACGTAT	ATACGT	25	17.2657	4.20717	1.44796	1.83837	0.0660083	ABRE
TAACTC	GAGTTA	34	24.9187	4.94822	1.36444	1.83527	0.0664653	unknown
ATACAT	ATGTAT	71	55.997	8.19862	1.26793	1.82994	0.0672587	unknown
AAAATT	AATTTT	215	169.959	24.6792	1.26501	1.82507	0.0679903	unknown
TGGACC	GGTCCA	21	14.1697	3.7432	1.48204	1.82473	0.0680417	unknown
ATTGTA	TACAAT	60	46.1353	7.59949	1.30052	1.82442	0.0680885	unknown
TACACC	GGTGTA	18	11.261	3.69866	1.59844	1.82201	0.0684535	unknown
CCCCAC	GTGGGG	14	8.49367	3.04692	1.64829	1.80718	0.0707342	unknown
CTACCC	GGGTAG	10	5.66933	2.39665	1.76388	1.80697	0.0707669	unknown
CGTGGG	CCCACG	10	5.57633	2.45225	1.79329	1.80392	0.0712432	unknown
TTTCTA	TAGAAA	83	66.3597	9.24237	1.25076	1.80044	0.0717913	unknown
ACCACA	TGTGGT	36	26.5307	5.26083	1.35692	1.79997	0.0718652	unknown
TTAAAA	TTTTAA	209	166.633	23.8842	1.25425	1.77385	0.0760877	unknown
ACATAA	TTATGT	78	61.5863	9.26217	1.26651	1.77212	0.0763748	unknown
TCGGCA	TGCCGA	9	5.03033	2.24761	1.78915	1.76617	0.0773673	DRE
AATGGT	ACCATT	47	36.3697	6.02183	1.29229	1.7653	0.0775134	unknown
AATGTA	TACATT	66	53.023	7.40707	1.24474	1.75197	0.0797783	L1 box
CTAGAA	TTCTAG	36	26.8287	5.2369	1.34185	1.75129	0.0798959	unknown
ACCAAA	TTTGGT	106	87.7973	10.4491	1.20733	1.74204	0.0815014	unknown
TATAAT	ATTATA	115	91.1773	13.7031	1.26128	1.73848	0.0821257	unknown
GTCTAT	ATAGAC	28	20.1473	4.53098	1.38976	1.7331	0.0830771	unknown
GGGAGT	ACTCCC	12	7.134	2.80797	1.68209	1.73293	0.0831086	unknown
TGGCAA	TTGCCA	29	20.8323	4.72056	1.39207	1.73023	0.0835885	unknown
TAGACA	TGTCTA	32	23.496	4.91929	1.36193	1.72871	0.0838618	unknown
AGGGAC	GTCCCT	12	7.28867	2.72552	1.64639	1.7286	0.0838812	unknown
TCGCAT	ATGCGA	15	9.526	3.17837	1.57464	1.72227	0.0850211	unknown
GACCAA	TTGGTC	41	31.459	5.56567	1.30328	1.71426	0.086481	unknown
CCTGCA	TGCAGG	14	8.394	3.28913	1.66786	1.7044	0.0883059	unknown
CCTACG	CGTAGG	8	4.47567	2.0695	1.78744	1.70299	0.0885705	unknown
ACGTCA	TGACGT	22	15.1717	4.01965	1.45007	1.69874	0.0893685	C-box/hexamer motif/TGA-box
ATTTTT	AAAAAT	237	191.711	26.6621	1.23624	1.69864	0.0893869	unknown
ATATGG	CCATAT	41	31.0417	5.87419	1.32081	1.69527	0.0900243	unknown
CATAAT	ATTATG	63	50.381	7.44408	1.25047	1.69517	0.0900426	unknown
ACCTAC	GTAGGT	16	10.5553	3.23405	1.51582	1.68354	0.0922699	unknown
CGAGGT	ACCTCG	11	6.571	2.63121	1.67402	1.68326	0.0923256	unknown
GAAAAT	ATTTTC	113	95.1557	10.6013	1.18753	1.68322	0.0923323	unknown
CACAAT	ATTGTG	45	34.9353	5.9829	1.28809	1.68224	0.0925225	unknown
GACACG	CGTGTC	17	11.1517	3.48148	1.52444	1.67984	0.0929882	ABRE/CE3
CATAAA	TTTATG	86	69.2237	9.99341	1.24235	1.67874	0.0932028	unknown
TATTTT	AAAATA	225	182.45	25.3601	1.23322	1.67784	0.0933779	EE
GCGAAT	ATTCGC	15	9.63533	3.20298	1.55677	1.6749	0.0939545	pE2F
ACTCTA	TAGAGT	32	23.3353	5.18522	1.37131	1.67103	0.0947155	unknown
ACCATA	TATGGT	39	29.8293	5.49038	1.30744	1.67032	0.0948569	unknown
CGGGTT	AACCCG	15	9.31133	3.40729	1.61094	1.66956	0.0950067	unknown
TAAAAA	TTTTTA	232	190.348	25.001	1.21882	1.66603	0.095708	unknown
TATACT	AGTATA	48	37.7873	6.14676	1.27027	1.66147	0.096619	unknown
CTACCA	TGGTAG	22	15.4517	3.94202	1.42379	1.66116	0.0966808	unknown
TTGTAC	GTACAA	32	23.6983	5.01236	1.35031	1.65624	0.0976731	unknown
TGACTA	TAGTCA	33	24.4403	5.17469	1.35023	1.65414	0.0980986	unknown
CACTCG	CGAGTG	13	8.21967	2.89094	1.58157	1.65356	0.0982176	unknown
GACTCG	CGAGTC	13	8.255	2.87473	1.5748	1.65059	0.0988222	unknown
GAATAG	CTATTC	26	18.8563	4.32881	1.37885	1.65026	0.0988896	unknown
CAACAC	GTGTTG	36	27.2867	5.2855	1.31933	1.64854	0.0992426	unknown
ATAATG	CATTAT	63	50.7353	7.44959	1.24174	1.64635	0.099691	unknown
CAGTCC	GGACTG	11	6.7	2.61259	1.64179	1.64588	0.0997888	unknown
ATTACT	AGTAAT	56	44.3513	7.11928	1.26265	1.63621	0.101795	unknown
TAAGGG	CCCTTA	16	10.6037	3.31103	1.50891	1.62981	0.103143	unknown
GGAGTA	TACTCC	17	11.626	3.32282	1.46224	1.6173	0.105813	unknown
AACGTC	GACGTT	18	12.4367	3.44053	1.44733	1.617	0.105879	unknown
ACCAAT	ATTGGT	53	42.2463	6.65515	1.25455	1.61584	0.106129	unknown
AAATGT	ACATTT	92	77.049	9.26091	1.19405	1.61442	0.106436	L1 box
TACGCT	AGCGTA	10	6.034	2.46297	1.65728	1.61025	0.107342	unknown
TGGACG	CGTCCA	13	8.13833	3.03847	1.59738	1.60004	0.10959	unknown
CGTATA	TATACG	23	16.4367	4.1045	1.39931	1.59906	0.109808	unknown
CATACT	AGTATG	27	19.802	4.50765	1.3635	1.59684	0.110301	unknown
TAACTA	TAGTTA	55	42.487	7.85691	1.29451	1.59261	0.111248	unknown
ATATGC	GCATAT	33	25.0447	5.01089	1.31765	1.58761	0.112375	unknown
CAATTT	AAATTG	95	80.4183	9.20584	1.18132	1.58396	0.113203	unknown
CACATA	TATGTG	45	34.5327	6.61076	1.30311	1.58338	0.113335	unknown
GCCTAG	CTAGGC	9	5.38167	2.29021	1.67234	1.57991	0.114127	unknown
CCACTT	AAGTGG	31	23.2903	4.88685	1.33102	1.57763	0.11465	unknown
ATACTC	GAGTAT	28	20.9393	4.47597	1.3372	1.57746	0.11469	unknown
TCCTAA	TTAGGA	36	27.2413	5.5607	1.32152	1.5751	0.115233	unknown
TGACAT	ATGTCA	40	31.2947	5.53595	1.27817	1.57251	0.115832	unknown
GTTAGG	CCTAAC	20	13.8757	3.89871	1.44137	1.57086	0.116215	unknown
TAAGTG	CACTTA	28	20.8997	4.52162	1.33973	1.57031	0.116344	unknown
TAGAAT	ATTCTA	51	39.7847	7.1665	1.2819	1.56497	0.117591	unknown
TGTGAC	GTCACA	26	19.158	4.384	1.35714	1.56068	0.1186	TGTCACA motif
ATGTAG	CTACAT	31	23.557	4.77965	1.31596	1.55723	0.119416	unknown
TTTGCA	TGCAAA	55	44.4137	6.79843	1.23836	1.55717	0.119429	Prolamine box
GCATTT	AAATGC	40	30.986	5.78944	1.29091	1.55697	0.119477	L1 box
AACTAT	ATAGTT	62	49.2953	8.16727	1.25773	1.55556	0.119813	unknown
AAATAG	CTATTT	70	56.5493	8.64988	1.23786	1.55501	0.119943	unknown
GTCTTA	TAAGAC	28	20.9703	4.52338	1.33522	1.55407	0.120167	unknown
CGTAGA	TCTACG	17	11.5347	3.51704	1.47382	1.55396	0.120195	unknown
TAGATG	CATCTA	33	25.4363	4.86818	1.29736	1.55369	0.120257	unknown
TGGGAC	GTCCCA	15	10.069	3.17431	1.48972	1.55341	0.120326	Site IIb
CCGCTA	TAGCGG	8	4.58933	2.20189	1.74317	1.54898	0.121388	unknown
CTTAGT	ACTAAG	26	19.0007	4.51886	1.36837	1.54891	0.121402	unknown
AATTCT	AGAATT	68	56.1793	7.63588	1.21041	1.54804	0.121612	unknown
ATATAA	TTATAT	143	117.959	16.1789	1.21229	1.54778	0.121676	unknown
ATAACA	TGTTAT	72	59.1443	8.31536	1.21736	1.54601	0.122101	unknown
TGCGGC	GCCGCA	7	3.807	2.06797	1.83872	1.54402	0.122582	unknown
CCTTGC	GCAAGG	13	8.503	2.91562	1.52887	1.54238	0.12298	unknown
TTGATT	AATCAA	104	88.5813	10.0127	1.17406	1.53992	0.123581	unknown
TACTAA	TTAGTA	53	42.158	7.05225	1.25718	1.53738	0.1242	unknown
TGCCAC	GTGGCA	18	12.5647	3.53676	1.43259	1.53681	0.124339	ABRE
GGTAAA	TTTACC	41	32.251	5.69984	1.27128	1.53496	0.124795	unknown
TAACGG	CCGTTA	17	11.574	3.54289	1.46881	1.53152	0.125641	unknown
TTAATA	TATTAA	112	90.887	13.8291	1.2323	1.52671	0.126832	unknown
ACGTTA	TAACGT	25	18.264	4.41786	1.36881	1.52472	0.127329	GARE
GTAGGA	TCCTAC	18	12.3033	3.74121	1.46302	1.52268	0.127839	unknown
AAAACA	TGTTTT	169	145.434	15.4818	1.16204	1.52215	0.127972	unknown
CGATCG	CGATCG	11	6.835	2.73635	1.60936	1.5221	0.127984	unknown
TACTCA	TGAGTA	30	22.5663	4.88599	1.32941	1.52143	0.128153	unknown
CCTCCC	GGGAGG	11	6.96567	2.65346	1.57917	1.52041	0.128409	unknown
ATGTGA	TCACAT	50	40.1457	6.48386	1.24546	1.51982	0.128555	unknown
TTATAT	ATATAA	132	108.646	15.3909	1.21495	1.51737	0.129175	unknown
CCCACA	TGTGGG	21	14.9393	3.99504	1.40569	1.51705	0.129254	unknown
TACCCC	GGGGTA	9	5.483	2.32627	1.64144	1.51186	0.130568	unknown
CTACTA	TAGTAG	32	23.4427	5.68485	1.36503	1.50529	0.13225	unknown
GATATA	TATATC	57	45.781	7.45799	1.24506	1.50429	0.132506	unknown
TTTTTA	TAAAAA	201	168.635	21.5762	1.19192	1.50002	0.13361	unknown
GAGTAG	CTACTC	19	13.4047	3.73205	1.41742	1.49926	0.133805	unknown
AGACCC	GGGTCT	14	9.33933	3.11064	1.49904	1.4983	0.134056	unknown
ATTAGA	TCTAAT	61	49.801	7.49418	1.22488	1.49436	0.135082	unknown
ATCATA	TATGAT	68	56.074	7.99265	1.21268	1.49212	0.135668	unknown
TTGCCT	AGGCAA	23	16.845	4.12553	1.36539	1.49193	0.135717	unknown
GGTGGT	ACCACC	23	16.132	4.60771	1.42574	1.49055	0.136081	unknown
TAACAA	TTGTTA	86	72.083	9.34779	1.19307	1.4888	0.13654	amylase box/GARE/TAACAAA box
TATGTT	AACATA	72	59.684	8.27746	1.20635	1.4879	0.136778	unknown
TACCAT	ATGGTA	32	24.5227	5.0301	1.30492	1.48652	0.137142	S1F box
AATTTG	CAAATT	107	90.8757	10.8518	1.17743	1.48586	0.137315	unknown
ATGCGA	TCGCAT	15	10.3217	3.1564	1.45325	1.48217	0.138294	unknown
GTACGC	GCGTAC	6	3.26733	1.84617	1.83636	1.48018	0.138824	unknown
TTAATT	AATTAA	151	128.341	15.3424	1.17655	1.47689	0.139706	unknown
ATAAGA	TCTTAT	70	58.07	8.08997	1.20544	1.47467	0.140302	I-box core motif
ACCAGA	TCTGGT	29	21.7217	4.94931	1.33507	1.47057	0.141406	unknown
GGTAAT	ATTACC	28	21.1763	4.64131	1.32223	1.4702	0.141507	unknown
ATGTTT	AAACAT	97	82.457	9.89671	1.17637	1.46948	0.141703	unknown
GGACGA	TCGTCC	13	8.65433	2.9589	1.50214	1.46868	0.141921	unknown
TCAATC	GATTGA	48	38.7227	6.32459	1.23958	1.46687	0.142412	unknown
CCCTCA	TGAGGG	14	9.374	3.15406	1.49349	1.46668	0.142463	unknown
ATACAA	TTGTAT	75	62.5993	8.46601	1.1981	1.46476	0.142987	unknown
GTAGAC	GTCTAC	17	11.852	3.52159	1.43436	1.46184	0.143785	unknown
GGCCAC	GTGGCC	12	7.39567	3.15443	1.62257	1.45964	0.144389	unknown
TAAATG	CATTTA	66	54.574	7.83294	1.20937	1.45871	0.144645	L1 box
TTCACT	AGTGAA	47	37.8823	6.25237	1.24068	1.45827	0.144765	unknown
TTTTTG	CAAAAA	161	140.559	14.0261	1.14543	1.45738	0.145012	unknown
TCGCCC	GGGCGA	4	1.94367	1.41156	2.05797	1.45678	0.145176	unknown
GGGCGT	ACGCCC	4	1.96433	1.39775	2.03631	1.45639	0.145286	unknown
CCACGA	TCGTGG	15	10.219	3.2844	1.46785	1.45567	0.145484	unknown
TTTACA	TGTAAA	75	60.9827	9.63005	1.22986	1.45558	0.145508	unknown
AGATAA	TTATCT	67	55.903	7.64241	1.1985	1.45203	0.146493	unknown
TCCTTT	AAAGGA	59	48.82	7.02467	1.20852	1.44918	0.147288	unknown
GTCACC	GGTGAC	15	10.3557	3.20571	1.44848	1.44877	0.147402	unknown
CCACCA	TGGTGG	36	24.3553	8.04458	1.47812	1.44752	0.147752	unknown
TGCCCG	CGGGCA	4	1.92867	1.43141	2.07397	1.44706	0.14788	unknown
TACGAA	TTCGTA	28	21.2133	4.70211	1.31992	1.44332	0.14893	unknown
TCCCAC	GTGGGA	20	14.152	4.08074	1.41323	1.43307	0.151837	Box C
AGGCAT	ATGCCT	17	11.728	3.68762	1.44952	1.42965	0.152818	unknown
CTAGGT	ACCTAG	12	7.82567	2.92816	1.53342	1.42558	0.153989	unknown
CTAGAT	ATCTAG	28	21.2513	4.73437	1.31756	1.42546	0.154024	unknown
CCATTT	AAATGG	62	51.4427	7.42211	1.20523	1.42242	0.154905	unknown
GTACAC	GTGTAC	18	12.115	4.14441	1.48576	1.41998	0.155612	unknown
AGAAAA	TTTTCT	179	159.41	13.8226	1.12289	1.41721	0.15642	unknown
GACAAT	ATTGTC	35	27.511	5.31896	1.27222	1.40798	0.159136	unknown
GGGCTA	TAGCCC	11	7.105	2.76801	1.54821	1.40715	0.159383	unknown
TGTGGC	GCCACA	16	11.263	3.36704	1.42058	1.40687	0.159465	unknown
TGACGT	ACGTCA	20	14.459	3.947	1.38322	1.40385	0.160364	C-box/hexamer motif/TGA-box
TCCAAC	GTTGGA	34	26.4597	5.37401	1.28497	1.40311	0.160584	unknown
TCCAAA	TTTGGA	76	64.5493	8.16279	1.17739	1.40279	0.16068	unknown
TATTCG	CGAATA	24	18.0047	4.28541	1.33299	1.39901	0.16181	unknown
TCGTAG	CTACGA	15	10.4513	3.25174	1.43522	1.39884	0.161861	unknown
TCAATT	AATTGA	79	66.6963	8.7978	1.18447	1.39849	0.161965	unknown
AACTGG	CCAGTT	21	15.266	4.10482	1.37561	1.3969	0.162445	unknown
GATATG	CATATC	37	29.4127	5.43724	1.25796	1.39544	0.162884	unknown
ATTTTG	CAAAAT	125	108.341	11.9669	1.15376	1.39209	0.163894	unknown
CCTCAT	ATGAGG	22	16.2367	4.14412	1.35496	1.39073	0.164308	unknown
CTATTC	GAATAG	26	19.6453	4.58001	1.32347	1.38748	0.165296	unknown
CCCACC	GGTGGG	14	9.523	3.23331	1.47012	1.38465	0.16616	unknown
AAACAA	TTGTTT	172	149.849	16.0314	1.14782	1.3817	0.167063	unknown
GTTCAC	GTGAAC	22	16.275	4.14702	1.35177	1.38051	0.16743	unknown
CATGTG	CACATG	34	26.7333	5.26898	1.27182	1.37914	0.167851	CATGTG moti/MYC binding site
TCACGC	GCGTGA	11	7.133	2.80415	1.54213	1.37903	0.167886	unknown
AATTAC	GTAATT	61	50.2903	7.7666	1.21296	1.37894	0.167914	unknown
CTCCAT	ATGGAG	34	26.597	5.38457	1.27834	1.37485	0.169177	unknown
ACGGGA	TCCCGT	10	6.41033	2.61322	1.55998	1.37366	0.169548	unknown
ACGAAA	TTTCGT	47	38.2647	6.36774	1.22829	1.37181	0.170123	unknown
ATATAG	CTATAT	59	48.4983	7.68095	1.21654	1.36724	0.171552	unknown
TATCTG	CAGATA	29	22.1593	5.00782	1.3087	1.366	0.17194	unknown
TGGCTT	AAGCCA	29	22.4977	4.76588	1.28902	1.36435	0.172457	unknown
TAGATA	TATCTA	50	40.639	6.87666	1.23035	1.36127	0.173428	unknown
TGGTAT	ATACCA	31	24.1613	5.02405	1.28304	1.36119	0.173455	S1F box
TTCTAT	ATAGAA	62	51.5243	7.70514	1.20331	1.35957	0.173967	unknown
ACTATT	AATAGT	55	43.846	8.21763	1.25439	1.35733	0.174678	unknown
TGTCAA	TTGACA	47	38.591	6.19934	1.2179	1.35643	0.174961	unknown
AATATT	AATATT	147	123.665	17.233	1.18869	1.35407	0.175714	unknown
TAACAG	CTGTTA	28	21.4743	4.81931	1.30388	1.35407	0.175715	amylase box/GARE
CCAAAT	ATTTGG	70	59.2507	7.95254	1.18142	1.35169	0.176476	unknown
GTAGGC	GCCTAC	9	5.42367	2.64748	1.65939	1.35084	0.176746	unknown
GAGACC	GGTCTC	16	11.397	3.41515	1.40388	1.34782	0.177718	unknown
ACATGC	GCATGT	23	17.1833	4.33366	1.33851	1.34221	0.17953	unknown
CTATAA	TTATAG	55	45.0797	7.3997	1.22006	1.34064	0.180037	TATA
ATAACT	AGTTAT	54	43.5267	7.81799	1.24062	1.33964	0.180361	unknown
CAGTAT	ATACTG	21	15.723	3.93922	1.33562	1.33961	0.180374	unknown
CTCCGT	ACGGAG	13	8.853	3.09967	1.46843	1.33789	0.180934	unknown
TCCACA	TGTGGA	34	27.021	5.21705	1.25828	1.33773	0.180985	unknown
CACAAA	TTTGTG	73	61.8933	8.32068	1.17945	1.33483	0.181933	unknown
CGGCAT	ATGCCG	8	5.00967	2.24661	1.59691	1.33104	0.183175	unknown
TCTCTC	GAGAGA	105	84.4307	15.521	1.24362	1.32525	0.185087	unknown
TTGCAT	ATGCAA	44	35.6653	6.29777	1.23369	1.32343	0.185692	unknown
AAATAA	TTATTT	216	183.664	24.4437	1.17606	1.32289	0.185872	unknown
TCACAA	TTGTGA	55	45.761	6.98652	1.2019	1.3224	0.186034	unknown
AATTTA	TAAATT	139	116.645	16.956	1.19165	1.31843	0.187358	unknown
GGGGGG	CCCCCC	6	2.327	2.78639	2.57843	1.31819	0.18744	unknown
ATATTG	CAATAT	63	52.3457	8.0836	1.20354	1.31802	0.187498	unknown
CGTGGT	ACCACG	12	8.186	2.89866	1.46592	1.31578	0.188247	unknown
AGGACA	TGTCCT	20	14.7303	4.00861	1.35774	1.31459	0.188649	unknown
AGGTAG	CTACCT	15	10.6427	3.31662	1.40942	1.31379	0.188918	unknown
CGAATT	AATTCG	32	25.1737	5.19601	1.27117	1.31376	0.188925	unknown
TGGCAT	ATGCCA	21	15.8197	3.94322	1.32746	1.31373	0.188937	unknown
TTAGAT	ATCTAA	60	49.842	7.73781	1.2038	1.31278	0.189259	unknown
ACGTCT	AGACGT	15	10.646	3.31678	1.40898	1.31272	0.189277	unknown
TCACCG	CGGTGA	17	12.041	3.77802	1.41184	1.31259	0.18932	CE1
CGAGTA	TACTCG	14	9.85333	3.1593	1.42084	1.31253	0.189342	unknown
GGTATG	CATACC	16	11.5187	3.42708	1.38905	1.30762	0.191001	unknown
TCCTTA	TAAGGA	32	25.2607	5.16194	1.26679	1.30558	0.191695	unknown
ACACTC	GAGTGT	25	19.1333	4.499	1.30662	1.30399	0.192235	unknown
CGCCCC	GGGGCG	3	1.379	1.24387	2.17549	1.30319	0.192509	unknown
AATTTT	AAAATT	189	158.686	23.3075	1.19103	1.3006	0.193396	unknown
ACAAAC	GTTTGT	64	53.9047	7.82509	1.18728	1.29012	0.197008	unknown
ACGAGT	ACTCGT	19	14.1063	3.79919	1.34691	1.28808	0.197717	unknown
ATTTTA	TAAAAT	159	133.201	20.1063	1.19368	1.28312	0.199451	unknown
AGCCAC	GTGGCT	17	12.5407	3.48306	1.35559	1.28029	0.200443	unknown
ATAATT	AATTAT	131	110.9	15.7125	1.18124	1.27924	0.200813	unknown
AATGCC	GGCATT	18	13.202	3.75516	1.36343	1.27771	0.201352	unknown
CCACTC	GAGTGG	19	14.292	3.68681	1.32942	1.27698	0.201608	unknown
CTAACT	AGTTAG	31	24.7253	4.91385	1.25377	1.27693	0.201625	unknown
AAAAAG	CTTTTT	159	142.557	12.8819	1.11534	1.27642	0.201808	unknown
TTGCGG	CCGCAA	11	7.56567	2.70039	1.45394	1.27179	0.203448	unknown
AGACAA	TTGTCT	56	46.8487	7.20086	1.19534	1.27087	0.203776	unknown
GAAAAA	TTTTTC	159	142.04	13.3797	1.1194	1.26759	0.204943	GT-1 motif
TTTAAA	TTTAAA	176	146.246	23.4798	1.20345	1.26722	0.205078	unknown
CACATT	AATGTG	46	37.991	6.32125	1.21081	1.267	0.205157	unknown
GTGTTA	TAACAC	31	24.703	4.97263	1.25491	1.26633	0.205394	unknown
AGAATA	TATTCT	55	46.476	6.73646	1.18341	1.26535	0.205745	unknown
TTTTCA	TGAAAA	111	95.9353	11.9074	1.15703	1.26515	0.205817	unknown
AACGGC	GCCGTT	16	11.369	3.66533	1.40734	1.26346	0.206424	unknown
CTATCA	TGATAG	28	22.1593	4.64368	1.26358	1.25777	0.208476	unknown
AAGGAC	GTCCTT	20	15.059	3.9442	1.32811	1.25273	0.210305	unknown
ATTTTC	GAAAAT	110	95.662	11.4528	1.14988	1.25192	0.2106	unknown
ACTCGG	CCGAGT	11	7.579	2.73513	1.45138	1.25076	0.21102	unknown
AACATA	TATGTT	75	63.253	9.39534	1.18571	1.2503	0.21119	unknown
CGACAC	GTGTCG	13	8.95933	3.23283	1.451	1.24989	0.211341	ABRE
CGGCAG	CTGCCG	6	3.59233	1.92736	1.67022	1.24921	0.21159	unknown
CATGGT	ACCATG	24	18.4847	4.42617	1.29837	1.24607	0.212737	unknown
TCCATA	TATGGA	39	31.8273	5.75638	1.22536	1.24604	0.21275	unknown
CTTGCC	GGCAAG	14	9.97233	3.2357	1.40388	1.24476	0.21322	unknown
AATCTT	AAGATT	85	73.698	9.0833	1.15336	1.24426	0.213403	unknown
GGTGAT	ATCACC	24	18.3873	4.52682	1.30525	1.23987	0.215024	unknown
ACTTTG	CAAAGT	49	41.012	6.44549	1.19477	1.23932	0.215229	Tbox
GATAAG	CTTATC	34	27.2097	5.48225	1.24956	1.2386	0.215492	I-box core motif
TTGGCA	TGCCAA	26	20.4467	4.49042	1.2716	1.23671	0.216196	unknown
ATTGGC	GCCAAT	22	16.9223	4.10779	1.30006	1.23611	0.216419	unknown
TCTTTA	TAAAGA	75	64.8207	8.24228	1.15704	1.23501	0.216825	unknown
CGCCTC	GAGGCG	9	5.58967	2.76234	1.61011	1.23458	0.216986	unknown
GGGTAC	GTACCC	7	4.43033	2.08884	1.58002	1.23019	0.218627	unknown
GGCAAT	ATTGCC	18	13.3863	3.75497	1.34465	1.22868	0.21919	unknown
GGAACC	GGTTCC	15	10.789	3.4274	1.3903	1.22863	0.219211	unknown
TAAACG	CGTTTA	29	22.907	4.95942	1.26599	1.22857	0.219233	unknown
TGCCGG	CCGGCA	7	4.377	2.13691	1.59927	1.22747	0.219645	unknown
TAAGGT	ACCTTA	25	19.4813	4.4996	1.28328	1.22648	0.220018	unknown
TTACCC	GGGTAA	18	13.4747	3.69539	1.33584	1.22459	0.22073	unknown
TTAAAT	ATTTAA	131	110.658	16.6345	1.18382	1.22286	0.221383	unknown
TTTGAG	CTCAAA	53	44.5957	6.87648	1.18846	1.22219	0.221637	unknown
TCTAGT	ACTAGA	29	22.9987	4.91603	1.26094	1.22077	0.222174	unknown
AAACCA	TGGTTT	81	69.907	9.08959	1.15868	1.22041	0.22231	MYB recognition sequences
TGACCG	CGGTCA	11	7.57433	2.81113	1.45227	1.21861	0.222993	unknown
GAATGG	CCATTC	25	19.2687	4.70799	1.29744	1.21736	0.223466	unknown
CTCGGA	TCCGAG	12	8.38	2.97544	1.43198	1.21663	0.223746	unknown
TTTGTA	TACAAA	88	76.7493	9.251	1.14659	1.21616	0.223925	unknown
GTAGCC	GGCTAC	11	7.58867	2.80727	1.44953	1.21518	0.224298	unknown
TATAAC	GTTATA	50	41.621	6.8954	1.20132	1.21516	0.224306	unknown
GTTCGG	CCGAAC	13	8.90733	3.3742	1.45947	1.21293	0.225156	unknown
TAGAAC	GTTCTA	27	21.4873	4.54775	1.25655	1.21217	0.225446	unknown
ACTGGG	CCCAGT	10	6.639	2.77463	1.50625	1.21133	0.225768	unknown
GTGGTT	AACCAC	30	23.854	5.08756	1.25765	1.20804	0.22703	unknown
GCGCCT	AGGCGC	5	2.87733	1.75802	1.73772	1.20742	0.227272	unknown
TTAGTG	CACTAA	34	27.583	5.31613	1.23264	1.20708	0.227401	unknown
TCACTT	AAGTGA	47	39.1337	6.51818	1.20101	1.20683	0.227498	unknown
AAATGA	TCATTT	93	81.169	9.80618	1.14576	1.20648	0.227631	unknown
TTCCGC	GCGGAA	9	6.02633	2.4661	1.49345	1.20582	0.227889	unknown
CGGGTA	TACCCG	7	4.42433	2.13693	1.58216	1.20531	0.228083	unknown
ACTACT	AGTAGT	32	25.373	5.49987	1.26118	1.20494	0.228228	unknown
GTGCAG	CTGCAC	11	7.51433	2.89377	1.46387	1.20454	0.228381	unknown
TTGTGT	ACACAA	60	50.7607	7.67487	1.18202	1.20384	0.228651	unknown
CGGTCA	TGACCG	12	8.43533	2.96188	1.42259	1.20351	0.228777	unknown
AATACA	TGTATT	67	57.1017	8.22759	1.17335	1.20307	0.228951	unknown
CATCTA	TAGATG	32	25.6177	5.31817	1.24914	1.2001	0.230101	unknown
TTTTAC	GTAAAA	75	63.6323	9.47487	1.17865	1.19977	0.230228	unknown
ACGATC	GATCGT	16	11.827	3.48154	1.35284	1.19861	0.23068	unknown
GTCTCC	GGAGAC	19	14.3697	3.86471	1.32223	1.19811	0.230876	unknown
AGAAAT	ATTTCT	90	78.677	9.47255	1.14392	1.19535	0.231951	unknown
CCACGG	CCGTGG	7	4.47333	2.11489	1.56483	1.1947	0.232204	unknown
GTATCC	GGATAC	15	10.7763	3.5372	1.39194	1.19407	0.232451	unknown
TATAAA	TTTATA	149	128.07	17.5445	1.16342	1.19295	0.232891	TATA
TAGTAC	GTACTA	21	16.165	4.05667	1.2991	1.19186	0.233315	unknown
TGTATA	TATACA	63	53.8563	7.70364	1.16978	1.18693	0.235256	unknown
GGACGT	ACGTCC	8	5.30333	2.27458	1.50849	1.18557	0.235793	unknown
CAATCT	AGATTG	43	35.6163	6.23673	1.20731	1.1839	0.236452	unknown
TATTTG	CAAATA	83	71.382	9.81877	1.16276	1.18324	0.236712	unknown
GACGTC	GACGTC	12	8.48433	2.97165	1.41437	1.18307	0.236782	C-box
CGTGTA	TACACG	17	12.8303	3.52681	1.32499	1.18228	0.237095	unknown
GATGGC	GCCATC	13	9.38067	3.06271	1.38583	1.18174	0.237309	unknown
ATTTAG	CTAAAT	61	51.8957	7.70601	1.17544	1.18146	0.23742	unknown
TTAGGA	TCCTAA	31	24.7033	5.33412	1.25489	1.18045	0.237821	unknown
ACTCAT	ATGAGT	35	28.4737	5.52927	1.22921	1.18032	0.237871	ACTCAT motif
TTTTGC	GCAAAA	59	50.6227	7.10641	1.16549	1.17884	0.238461	unknown
GAGTAT	ATACTC	27	21.5087	4.66439	1.25531	1.17729	0.23908	unknown
CTTCCT	AGGAAG	39	31.734	6.19161	1.22897	1.17352	0.240586	unknown
TGGTAG	CTACCA	21	16.079	4.19801	1.30605	1.17222	0.241108	unknown
TTTTGT	ACAAAA	163	146.9	13.7497	1.1096	1.17096	0.241615	unknown
TCAACG	CGTTGA	27	21.044	5.11189	1.28303	1.16513	0.243968	unknown
GTCACA	TGTGAC	26	20.5447	4.69482	1.26554	1.16199	0.24524	TGTCACA motif
TAGGTA	TACCTA	19	14.4223	3.94011	1.3174	1.16181	0.245312	unknown
TCCATT	AATGGA	52	44.197	6.75372	1.17655	1.15536	0.247942	unknown
ATTACC	GGTAAT	31	25.0283	5.17485	1.2386	1.15398	0.248509	unknown
ACCGAT	ATCGGT	18	13.4673	3.93091	1.33657	1.15308	0.248877	unknown
AGTCTC	GAGACT	27	21.6153	4.67468	1.24911	1.15188	0.249371	unknown
AACTTG	CAAGTT	50	42.285	6.69896	1.18245	1.15167	0.249456	unknown
CTCTCT	AGAGAG	99	81.127	15.5738	1.22031	1.14764	0.251119	unknown
CATCAC	GTGATG	31	24.934	5.28926	1.24328	1.14685	0.251443	unknown
CGTCAT	ATGACG	18	13.8123	3.65425	1.30318	1.14597	0.251807	unknown
TGTCTC	GAGACA	34	27.612	5.58108	1.23135	1.14458	0.252383	AuxREs
CTAGCT	AGCTAG	20	15.3463	4.07823	1.30324	1.1411	0.253828	unknown
GTCTAG	CTAGAC	13	9.54967	3.03149	1.3613	1.13816	0.255052	unknown
AAATGC	GCATTT	37	30.535	5.68157	1.21172	1.13789	0.255166	L1 box
CACCCT	AGGGTG	10	6.699	2.91088	1.49276	1.13402	0.256786	unknown
GCAGTA	TACTGC	12	8.611	2.98942	1.39357	1.13366	0.256936	unknown
ATGATT	AATCAT	78	68.582	8.31001	1.13732	1.13333	0.257075	unknown
ATCTCC	GGAGAT	34	27.6513	5.60573	1.2296	1.13253	0.257411	unknown
CATGCG	CGCATG	9	6.17267	2.5111	1.45804	1.12593	0.260193	unknown
TTAGGG	CCCTAA	22	17.108	4.34802	1.28595	1.12511	0.260543	unknown
TTTTAA	TTAAAA	181	156.841	21.4742	1.15403	1.12503	0.260578	unknown
GGTAGC	GCTACC	8	5.37867	2.3349	1.48736	1.12267	0.261576	unknown
TTTCAC	GTGAAA	54	45.8027	7.30932	1.17897	1.12149	0.262079	unknown
CTCCCA	TGGGAG	18	13.6987	3.84163	1.314	1.11966	0.262857	Box C
CATGCA	TGCATG	29	23.153	5.23877	1.25254	1.1161	0.264379	RY repeat
CACCGC	GCGGTG	10	6.47933	3.16073	1.54337	1.11388	0.265332	unknown
CCCAAC	GTTGGG	20	15.49	4.05537	1.29116	1.1121	0.266093	unknown
ACCACC	GGTGGT	26	18.5143	6.73436	1.40432	1.11156	0.266326	unknown
TTAGAA	TTCTAA	63	53.5467	8.51998	1.17654	1.10955	0.267193	unknown
ACGCCT	AGGCGT	8	5.243	2.48502	1.52584	1.10945	0.267238	unknown
GGAATA	TATTCC	27	21.7367	4.74716	1.24214	1.10873	0.267545	unknown
AGTGCA	TGCACT	14	10.493	3.18769	1.33422	1.10017	0.271257	unknown
ATTAAA	TTTAAT	148	128.14	18.0647	1.15498	1.09936	0.27161	unknown
GAGCGA	TCGCTC	11	7.88533	2.84644	1.39499	1.09423	0.273853	unknown
TCCCGC	GCGGGA	8	5.251	2.51252	1.52352	1.09412	0.273903	E2Fa element
ATTGAC	GTCAAT	35	29.1387	5.35771	1.20115	1.094	0.273955	unknown
TAAAAT	ATTTTA	171	147.225	21.7397	1.16149	1.09362	0.274122	unknown
CCTATT	AATAGG	23	18.314	4.28791	1.25587	1.09284	0.274464	unknown
ACACGC	GCGTGT	10	7.182	2.58001	1.39237	1.09225	0.274725	CE3
CAAGTC	GACTTG	27	21.7193	4.83911	1.24313	1.09125	0.275164	unknown
TGGTTA	TAACCA	43	36.393	6.06378	1.18155	1.08958	0.275897	MYB recognition sequences
CGCTAG	CTAGCG	6	3.79833	2.02147	1.57964	1.08914	0.276093	unknown
GTTATA	TATAAC	48	40.3083	7.06767	1.19082	1.08829	0.276467	unknown
TCCGAA	TTCGGA	19	14.7533	3.90917	1.28784	1.08634	0.277331	unknown
AAGAGT	ACTCTT	47	40.111	6.35286	1.17175	1.08439	0.27819	unknown
TTTTTT	AAAAAA	499	439.638	54.7998	1.13503	1.08326	0.278693	unknown
AAAAAC	GTTTTT	149	133.448	14.3967	1.11654	1.08022	0.280043	unknown
CCCCTT	AAGGGG	11	8.059	2.72384	1.36493	1.07972	0.280265	unknown
TGATAT	ATATCA	65	56.2873	8.12663	1.15479	1.07211	0.283669	unknown
TAAGAA	TTCTTA	81	71.8563	8.53706	1.12725	1.07106	0.284144	unknown
ATGACC	GGTCAT	19	14.8027	3.92533	1.28355	1.0693	0.284937	unknown
ATATGA	TCATAT	69	60.1377	8.29439	1.14737	1.06847	0.285307	unknown
GACCAT	ATGGTC	23	18.4133	4.29426	1.24909	1.06809	0.285478	unknown
GCGTAT	ATACGC	10	7.16	2.6621	1.39665	1.06683	0.28605	unknown
CAAACT	AGTTTG	56	48.0513	7.4517	1.16542	1.06669	0.286111	unknown
CCGTTG	CAACGG	15	11.1807	3.58092	1.3416	1.06658	0.286162	unknown
GTAGTC	GACTAC	14	10.498	3.29388	1.33359	1.06319	0.287698	unknown
GAATTA	TAATTC	52	44.869	6.73456	1.15893	1.05887	0.289661	unknown
CCCTCC	GGAGGG	11	7.76433	3.05896	1.41673	1.05777	0.290162	unknown
TCACGT	ACGTGA	20	15.426	4.3336	1.29651	1.05547	0.291209	unknown
GGTATC	GATACC	12	8.91033	2.92788	1.34675	1.05526	0.291308	unknown
CCTCCT	AGGAGG	24	17.5507	6.11925	1.36747	1.05394	0.29191	unknown
GGACAA	TTGTCC	26	20.9573	4.78482	1.24062	1.05389	0.291934	unknown
ACCTAG	CTAGGT	13	9.65867	3.17546	1.34594	1.05224	0.292691	unknown
CTCCAA	TTGGAG	36	30.176	5.53599	1.193	1.05202	0.292788	unknown
GACCAG	CTGGTC	13	9.65767	3.17834	1.34608	1.0516	0.292984	unknown
ACTTAT	ATAAGT	48	40.8313	6.82288	1.17557	1.05068	0.293406	unknown
AGTACA	TGTACT	26	21.0357	4.73799	1.236	1.04777	0.294744	unknown
AACCAC	GTGGTT	32	26.4987	5.25857	1.20761	1.04617	0.295485	unknown
AGTAGC	GCTACT	17	13.091	3.743	1.2986	1.04435	0.296324	unknown
CTATTA	TAATAG	39	32.609	6.14508	1.19599	1.04002	0.298331	unknown
ACGCTT	AAGCGT	13	9.662	3.21266	1.34548	1.03901	0.298798	unknown
GACCCA	TGGGTC	18	14.183	3.68131	1.26913	1.03686	0.299801	unknown
AACACG	CGTGTT	22	17.4263	4.42121	1.26246	1.03448	0.30091	unknown
ATTTAA	TTAAAT	125	108.192	16.3157	1.15536	1.03019	0.302919	unknown
GTCTCG	CGAGAC	12	8.73967	3.16974	1.37305	1.02858	0.303677	unknown
CCATCC	GGATGG	15	11.021	3.87103	1.36104	1.02789	0.304001	PE3
TGCATC	GATGCA	23	18.4177	4.46459	1.2488	1.02637	0.304716	unknown
TAACTG	CAGTTA	23	18.5997	4.29126	1.23658	1.02542	0.305166	MYB recognition sequences
CGTTAA	TTAACG	23	18.3783	4.50888	1.25147	1.02501	0.305356	unknown
CCAGAG	CTCTGG	16	12.2863	3.632	1.30226	1.02249	0.306551	unknown
CTCACA	TGTGAG	26	21.404	4.52485	1.21473	1.01572	0.309761	unknown
AGACGT	ACGTCT	15	11.4107	3.53547	1.31456	1.01524	0.309993	unknown
AAAATC	GATTTT	118	105.189	12.6383	1.12179	1.01364	0.310756	unknown
CATAAC	GTTATG	35	29.3317	5.59232	1.19325	1.01359	0.310778	unknown
GGACCG	CGGTCC	8	5.58833	2.38259	1.43155	1.0122	0.311442	unknown
ACGTGA	TCACGT	21	16.4477	4.50267	1.27678	1.01103	0.312002	unknown
GTAAGG	CCTTAC	14	10.5787	3.38531	1.32342	1.01064	0.312188	unknown
AGTCAC	GTGACT	20	15.9447	4.01335	1.25434	1.01046	0.312274	unknown
AATCAA	TTGATT	107	95.5223	11.3734	1.12016	1.00916	0.312896	unknown
GCCTGC	GCAGGC	5	3.137	1.84681	1.59388	1.00877	0.313086	unknown
TGCATG	CATGCA	28	22.785	5.1762	1.22888	1.0075	0.313696	RY repeat
GTCGTA	TACGAC	13	9.80367	3.17729	1.32603	1.00599	0.314418	unknown
CGTAAC	GTTACG	14	10.6873	3.293	1.30996	1.00597	0.314429	unknown
TCCGCA	TGCGGA	8	5.62733	2.36269	1.42163	1.00422	0.315272	unknown
AATACC	GGTATT	26	20.9967	4.98407	1.23829	1.00387	0.315444	S1F box
TACGTC	GACGTA	11	8.06367	2.92799	1.36414	1.00285	0.315934	TGA-box
CACGCA	TGCGTG	10	7.27167	2.72305	1.3752	1.00194	0.316372	D4 element
CGTCCT	AGGACG	9	6.19833	2.80314	1.452	0.999473	0.317566	unknown
TAGGGC	GCCCTA	7	4.80567	2.19792	1.45661	0.998369	0.3181	unknown
ACTTGC	GCAAGT	22	17.5107	4.50733	1.25638	0.996008	0.319246	unknown
GCACTA	TAGTGC	11	8.19	2.83136	1.3431	0.992458	0.320974	unknown
CCTCTC	GAGAGG	28	22.9447	5.09564	1.22033	0.992089	0.321154	unknown
TCCAGA	TCTGGA	23	18.5293	4.50665	1.24128	0.992015	0.32119	unknown
CATTTA	TAAATG	63	54.9137	8.16462	1.14726	0.990411	0.321973	L1 box
ATGATC	GATCAT	40	33.9913	6.06967	1.17677	0.98995	0.322199	unknown
TCCGAC	GTCGGA	12	9.00167	3.02964	1.33309	0.989666	0.322337	unknown
ATCTAA	TTAGAT	61	53.2337	7.85958	1.14589	0.988136	0.323086	unknown
CTACGT	ACGTAG	13	9.77433	3.26654	1.33001	0.987487	0.323404	unknown
GATACG	CGTATC	13	9.84433	3.19774	1.32056	0.986844	0.323719	unknown
CGAAAA	TTTTCG	44	37.5597	6.52932	1.17147	0.986372	0.323951	unknown
ATCGTA	TACGAT	20	15.9123	4.14645	1.25689	0.985823	0.32422	unknown
TTTAGA	TCTAAA	67	58.227	8.91908	1.15067	0.983622	0.325302	unknown
GCCACA	TGTGGC	16	12.5157	3.55415	1.2784	0.980357	0.32691	unknown
TCTCCA	TGGAGA	42	35.8263	6.30255	1.17232	0.979551	0.327308	unknown
ATAAAA	TTTTAT	197	176.802	20.6982	1.11424	0.975835	0.329146	unknown
TCTATT	AATAGA	55	47.6373	7.55135	1.15456	0.975014	0.329553	unknown
ATCGGT	ACCGAT	16	12.5313	3.55817	1.2768	0.974846	0.329637	unknown
TGACGG	CCGTCA	11	8.11967	2.95673	1.35474	0.974161	0.329976	unknown
TATACC	GGTATA	23	18.8223	4.30081	1.22195	0.971368	0.331365	unknown
TTTATC	GATAAA	66	58.2157	8.05763	1.13372	0.966082	0.334003	unknown
CCTTAT	ATAAGG	26	21.4933	4.66846	1.20968	0.965343	0.334373	I-box core motif
AGATAC	GTATCT	28	23.1483	5.0268	1.20959	0.965159	0.334465	unknown
GTGAGT	ACTCAC	20	16.1187	4.03584	1.2408	0.961716	0.336192	unknown
CGAATG	CATTCG	15	11.481	3.66043	1.30651	0.961362	0.33637	unknown
CACCTG	CAGGTG	10	7.25467	2.85725	1.37842	0.960831	0.336637	RAV1-B/Site I
TGTGAT	ATCACA	45	38.944	6.30366	1.15551	0.960712	0.336697	unknown
CCGATA	TATCGG	12	9.05967	3.06419	1.32455	0.959581	0.337266	unknown
CGCTAT	ATAGCG	8	5.756	2.33915	1.38985	0.959323	0.337396	unknown
CCACGC	GCGTGG	7	4.878	2.21301	1.43501	0.958875	0.337622	hex3
GACATC	GATGTC	19	15.2357	3.9275	1.24707	0.958455	0.337833	unknown
GTGACT	AGTCAC	19	15.3203	3.84491	1.24018	0.957023	0.338555	unknown
TTGATA	TATCAA	65	57.032	8.33339	1.13971	0.956153	0.338995	unknown
GTATCA	TGATAC	28	23.3897	4.8398	1.19711	0.952588	0.340799	unknown
GTATTC	GAATAC	23	18.9273	4.28285	1.21517	0.950924	0.341643	unknown
TAGACT	AGTCTA	23	18.86	4.35401	1.21951	0.950848	0.341682	unknown
TTTAGC	GCTAAA	34	28.9703	5.29303	1.17361	0.950244	0.341988	unknown
CTAACC	GGTTAG	20	16.1007	4.10944	1.24218	0.948872	0.342686	unknown
CACCAC	GTGGTG	27	20.3497	7.01621	1.3268	0.947853	0.343204	unknown
ACATCG	CGATGT	15	11.7627	3.42533	1.27522	0.945114	0.3446	unknown
ATCCCG	CGGGAT	8	5.61933	2.52413	1.42366	0.943164	0.345597	unknown
GTTTTT	AAAAAC	132	120.006	12.7449	1.09995	0.94108	0.346664	unknown
ACAATG	CATTGT	41	35.2863	6.08413	1.16192	0.939109	0.347675	unknown
ACTCAC	GTGAGT	22	17.896	4.38865	1.22932	0.935139	0.349717	unknown
CTAATT	AATTAG	68	60.2943	8.2428	1.1278	0.934837	0.349873	unknown
TTTGAC	GTCAAA	53	46.533	6.92837	1.13898	0.933409	0.350609	WB box
TCCCTC	GAGGGA	19	15.228	4.04501	1.2477	0.932506	0.351075	unknown
CACTCT	AGAGTG	28	23.2303	5.11866	1.20532	0.931819	0.35143	unknown
AGTCCT	AGGACT	14	10.9583	3.26489	1.27757	0.93163	0.351528	unknown
ATTCTC	GAGAAT	48	41.932	6.54754	1.14471	0.92676	0.354051	unknown
CACTAT	ATAGTG	26	21.6783	4.67113	1.19935	0.925186	0.354869	unknown
CGCCAC	GTGGCG	10	7.299	2.92423	1.37005	0.923662	0.355662	ABRE
TAGGTC	GACCTA	12	9.18733	3.04729	1.30615	0.923005	0.356005	unknown
TGATTA	TAATCA	64	56.6427	7.983	1.12989	0.921626	0.356724	unknown
GTACCC	GGGTAC	7	4.981	2.19277	1.40534	0.920753	0.357179	unknown
GGGATA	TATCCC	14	10.8557	3.42024	1.28965	0.91933	0.357923	unknown
CGGGAA	TTCCCG	13	9.75333	3.53327	1.33288	0.918885	0.358156	E2Fa element
TATGGC	GCCATA	14	10.9517	3.32481	1.27834	0.916845	0.359224	unknown
TATCGA	TCGATA	22	18.2557	4.08491	1.20511	0.916625	0.359339	unknown
TTCATA	TATGAA	66	58.684	7.99392	1.12467	0.915195	0.360089	unknown
AAACGA	TCGTTT	51	44.4903	7.1167	1.14632	0.914703	0.360348	unknown
TACTAG	CTAGTA	23	18.9697	4.40733	1.21246	0.914462	0.360474	unknown
CACTTT	AAAGTG	46	40.1277	6.42976	1.14634	0.913305	0.361082	unknown
AATGTT	AACATT	79	71.118	8.64976	1.11083	0.911239	0.362169	unknown
TACTCC	GGAGTA	14	10.988	3.30588	1.27412	0.911104	0.36224	unknown
TATGAA	TTCATA	65	57.608	8.11782	1.12832	0.91059	0.362512	unknown
ATGCCG	CGGCAT	7	4.932	2.27254	1.4193	0.909996	0.362825	unknown
CTAACG	CGTTAG	12	9.27433	2.99634	1.29389	0.909665	0.362999	unknown
GGAGTT	AACTCC	22	18.0663	4.34545	1.21773	0.905239	0.365339	unknown
ACGCCA	TGGCGT	11	8.12467	3.18661	1.3539	0.902316	0.366889	unknown
GTGACG	CGTCAC	13	9.989	3.34254	1.30143	0.900811	0.367689	unknown
ATAGAT	ATCTAT	51	44.324	7.41328	1.15062	0.900546	0.36783	unknown
GGGGGC	GCCCCC	3	1.79967	1.33321	1.66698	0.900331	0.367944	unknown
ATACTG	CAGTAT	19	15.339	4.06779	1.23867	0.899997	0.368122	unknown
TTATAG	CTATAA	44	37.914	6.76524	1.16052	0.899598	0.368334	unknown
CCAACG	CGTTGG	15	11.804	3.55666	1.27076	0.898597	0.368867	unknown
ATCTAT	ATAGAT	51	44.401	7.34676	1.14862	0.898219	0.369069	unknown
CCCGTT	AACGGG	8	5.76267	2.49902	1.38825	0.895285	0.370635	unknown
CACGTC	GACGTG	14	10.9107	3.45263	1.28315	0.894777	0.370907	unknown
TTAGTA	TACTAA	47	41.0693	6.63846	1.14441	0.893379	0.371654	unknown
GCTGCC	GGCAGC	7	4.91867	2.33564	1.42315	0.89112	0.372865	unknown
GTCGCA	TGCGAC	8	5.809	2.45897	1.37717	0.891023	0.372917	unknown
ATCACT	AGTGAT	37	31.9087	5.72147	1.15956	0.889864	0.373539	unknown
TAAATT	AATTTA	135	120.008	16.8499	1.12493	0.889738	0.373607	unknown
TTATCA	TGATAA	63	56.035	7.82974	1.1243	0.889557	0.373704	unknown
TGTATC	GATACA	30	25.4913	5.08441	1.17687	0.886763	0.375206	unknown
AGCCTA	TAGGCT	15	11.8233	3.59227	1.26868	0.884306	0.376531	unknown
TCATAA	TTATGA	63	55.6847	8.28163	1.13137	0.88332	0.377063	unknown
GTAATT	AATTAC	55	48.579	7.27265	1.13218	0.882897	0.377292	unknown
GTTACT	AGTAAC	30	25.4307	5.19822	1.17968	0.879018	0.379391	unknown
CGCGAT	ATCGCG	5	3.35067	1.8764	1.49224	0.878989	0.379407	unknown
TACATC	GATGTA	26	21.751	4.83682	1.19535	0.87847	0.379689	unknown
TCACTC	GAGTGA	26	21.847	4.72811	1.19009	0.878363	0.379747	unknown
CTTCAC	GTGAAG	32	27.0217	5.67062	1.18423	0.877917	0.379989	unknown
AAACTT	AAGTTT	96	86.8017	10.4978	1.10597	0.876218	0.380911	unknown
ACGTCC	GGACGT	7	5.09333	2.2055	1.37435	0.864504	0.387311	unknown
TGCACT	AGTGCA	14	11.1317	3.32957	1.25767	0.861473	0.388978	unknown
CGCGTA	TACGCG	6	4.202	2.09045	1.42789	0.860101	0.389733	unknown
TAATGA	TCATTA	57	50.642	7.43494	1.12555	0.855152	0.392467	unknown
GTCCTC	GAGGAC	13	10.1263	3.38224	1.28378	0.849635	0.395528	unknown
CAATCA	TGATTG	48	42.213	6.8156	1.13709	0.849081	0.395836	unknown
TAGTCC	GGACTA	14	11.207	3.29835	1.24922	0.846787	0.397114	unknown
GGGTAT	ATACCC	12	9.33867	3.15573	1.28498	0.843334	0.399042	unknown
ATGTGC	GCACAT	17	13.7753	3.82741	1.23409	0.842519	0.399497	unknown
CACTCC	GGAGTG	13	10.297	3.20877	1.2625	0.842378	0.399576	unknown
TTAAGG	CCTTAA	28	24.01	4.74033	1.16618	0.841714	0.399948	unknown
GTCGGC	GCCGAC	7	5.096	2.26388	1.37363	0.841033	0.400329	DRE
AATGAT	ATCATT	71	63.5633	8.84911	1.117	0.840386	0.400692	unknown
AAATCT	AGATTT	95	85.9533	10.7796	1.10525	0.839242	0.401334	unknown
TATCAA	TTGATA	67	59.382	9.08113	1.12829	0.838883	0.401535	unknown
GATAGG	CCTATC	12	9.35667	3.15216	1.28251	0.838579	0.401706	unknown
GGTACA	TGTACC	15	12.0877	3.47544	1.24093	0.837976	0.402044	unknown
AGTATT	AATACT	46	40.277	6.83182	1.14209	0.837697	0.402201	unknown
TAGTAA	TTACTA	50	43.644	7.62198	1.14563	0.833904	0.404335	unknown
GAACAC	GTGTTC	22	18.405	4.32865	1.19533	0.830513	0.406249	unknown
AAGCCG	CGGCTT	11	8.48833	3.02659	1.2959	0.829867	0.406614	unknown
CAGAAA	TTTCTG	57	50.792	7.48265	1.12222	0.829652	0.406735	unknown
GCCCCC	GGGGGC	3	1.83233	1.40767	1.63726	0.8295	0.406821	unknown
AGGTAC	GTACCT	13	10.2613	3.30263	1.26689	0.829239	0.406969	unknown
AAGGGC	GCCCTT	9	6.87933	2.56053	1.30827	0.828215	0.407549	MNF1 binding site
GTACCA	TGGTAC	16	13.0487	3.56603	1.22618	0.827625	0.407883	unknown
GGCTTA	TAAGCC	17	13.8373	3.82471	1.22856	0.826903	0.408292	unknown
CACGCT	AGCGTG	7	5.13233	2.25902	1.3639	0.826758	0.408374	unknown
AGTGAT	ATCACT	35	30.3463	5.65117	1.15335	0.823488	0.410231	unknown
TTCTAA	TTAGAA	61	53.951	8.56024	1.13066	0.823458	0.410247	unknown
AATTAT	ATAATT	121	109.219	14.355	1.10787	0.820688	0.411824	unknown
ACGGCA	TGCCGT	9	6.86733	2.60077	1.31055	0.820015	0.412208	unknown
ACCGTT	AACGGT	20	16.5523	4.20498	1.20829	0.819902	0.412272	unknown
GCACCA	TGGTGC	13	10.1913	3.42588	1.27559	0.819839	0.412308	unknown
ACGAGA	TCTCGT	24	20.1703	4.67375	1.18987	0.819399	0.412559	unknown
CGGCTA	TAGCCG	9	6.841	2.64122	1.3156	0.817425	0.413685	unknown
CATACA	TGTATG	36	31.0673	6.03581	1.15877	0.817234	0.413795	unknown
ATCCGA	TCGGAT	20	16.549	4.24479	1.20853	0.812996	0.41622	unknown
TCCGTT	AACGGA	17	13.926	3.78444	1.22074	0.812274	0.416634	unknown
ATGAAA	TTTCAT	94	86.1893	9.6254	1.09062	0.811464	0.417099	unknown
TTCACG	CGTGAA	19	15.6603	4.12156	1.21326	0.810291	0.417773	unknown
TTAAGT	ACTTAA	47	41.3423	6.99706	1.13685	0.808578	0.418758	unknown
ATCGAC	GTCGAT	15	12.2037	3.46259	1.22914	0.807585	0.41933	unknown
TGTACG	CGTACA	12	9.40233	3.22065	1.27628	0.806566	0.419917	unknown
ACGTAA	TTACGT	25	21.2313	4.69367	1.1775	0.802926	0.422017	TGA-box
GAACTA	TAGTTC	25	21.132	4.82158	1.18304	0.802226	0.422422	unknown
GCACGA	TCGTGC	8	6.001	2.49528	1.33311	0.801113	0.423066	unknown
GATGTA	TACATC	25	21.148	4.81794	1.18214	0.799513	0.423993	unknown
CTCCTT	AAGGAG	33	28.129	6.09623	1.17317	0.799018	0.42428	unknown
TTCGTA	TACGAA	25	21.341	4.58829	1.17145	0.797465	0.425181	unknown
GACGGG	CCCGTC	6	4.27967	2.15816	1.40198	0.797128	0.425377	unknown
CCAGTC	GACTGG	10	7.56833	3.05086	1.32129	0.797042	0.425427	unknown
GTTTCA	TGAAAC	52	46.3127	7.17947	1.1228	0.792166	0.428264	unknown
ATGTTA	TAACAT	56	49.8253	7.79725	1.12393	0.791903	0.428417	unknown
GCCCCG	CGGGGC	2	1.143	1.08333	1.74978	0.791078	0.428899	unknown
CACCTT	AAGGTG	20	16.7157	4.19047	1.19648	0.783763	0.433179	unknown
TTAACT	AGTTAA	52	46.245	7.35906	1.12445	0.78203	0.434197	unknown
ACCCGC	GCGGGT	6	4.349	2.11203	1.37963	0.781711	0.434384	unknown
CGCTTA	TAAGCG	9	6.99233	2.57847	1.28712	0.778628	0.436199	unknown
TGTATG	CATACA	34	29.6417	5.61092	1.14703	0.776759	0.437301	unknown
TCGCAG	CTGCGA	9	6.891	2.74134	1.30605	0.769331	0.441697	unknown
TTTGTG	CACAAA	64	57.7213	8.16892	1.10878	0.768604	0.442128	unknown
AATACT	AGTATT	46	41.1407	6.32536	1.11812	0.76823	0.442351	unknown
TCGTCC	GGACGA	11	8.60967	3.11478	1.27763	0.767416	0.442834	unknown
GGTCCT	AGGACC	10	7.784	2.88977	1.28469	0.766842	0.443175	unknown
GGCTAT	ATAGCC	14	11.3843	3.41533	1.22976	0.76586	0.44376	unknown
GGGGTT	AACCCC	13	10.4963	3.27173	1.23853	0.765242	0.444127	unknown
GAAATA	TATTTC	66	59.9757	7.87611	1.10045	0.764887	0.444339	unknown
CCCTTC	GAAGGG	13	10.5293	3.23047	1.23465	0.7648	0.44439	unknown
CCGCCC	GGGCGG	3	1.90333	1.43597	1.57618	0.763711	0.445039	unknown
ATCCAG	CTGGAT	17	13.9713	3.98076	1.21678	0.760826	0.446761	unknown
AATTAG	CTAATT	66	59.8097	8.14344	1.1035	0.760162	0.447158	unknown
TAGCTA	TAGCTA	28	24.185	5.02326	1.15774	0.759466	0.447574	unknown
CGCAGT	ACTGCG	6	4.40867	2.1036	1.36096	0.756481	0.449361	unknown
CGGGTC	GACCCG	8	5.99233	2.66345	1.33504	0.753784	0.450979	unknown
CTAGAC	GTCTAG	13	10.514	3.30113	1.23645	0.753076	0.451404	unknown
CACACT	AGTGTG	24	20.372	4.82529	1.17809	0.751873	0.452128	unknown
GACTAC	GTAGTC	13	10.519	3.3014	1.23586	0.751498	0.452353	unknown
GCATGG	CCATGC	12	9.53733	3.28058	1.25821	0.750681	0.452845	unknown
TCTCAC	GTGAGA	31	26.937	5.4241	1.15083	0.749065	0.453818	unknown
AAAACT	AGTTTT	106	97.6843	11.1148	1.08513	0.748158	0.454365	unknown
ACTCGC	GCGAGT	8	6.09167	2.55175	1.31327	0.747852	0.454549	unknown
GATACA	TGTATC	29	25.231	5.04329	1.14938	0.747329	0.454865	unknown
CCCTAT	ATAGGG	12	9.675	3.118	1.24031	0.745669	0.455867	unknown
CCAAAC	GTTTGG	46	40.861	6.90504	1.12577	0.744239	0.456732	unknown
GATCAA	TTGATC	47	42.164	6.49907	1.1147	0.744107	0.456812	unknown
TCTGAC	GTCAGA	18	14.9713	4.07227	1.2023	0.74373	0.45704	unknown
CCCCGT	ACGGGG	3	1.97133	1.3863	1.52181	0.742025	0.458072	unknown
CGTGCA	TGCACG	8	6.076	2.59329	1.31666	0.741916	0.458138	unknown
CCACAC	GTGTGG	19	16.0097	4.04455	1.18678	0.739349	0.459695	unknown
GCATTA	TAATGC	23	19.6547	4.52499	1.17021	0.739301	0.459724	unknown
ACTCCA	TGGAGT	24	20.583	4.62719	1.16601	0.738461	0.460235	unknown
CCCCGC	GCGGGG	3	1.94133	1.43408	1.54533	0.738222	0.46038	unknown
CCCGCC	GGCGGG	6	4.26867	2.35081	1.40559	0.736482	0.461437	unknown
ATCCAA	TTGGAT	57	51.5683	7.38053	1.10533	0.735946	0.461764	unknown
TTATAC	GTATAA	43	38.2243	6.51087	1.12494	0.733491	0.463259	unknown
CGTTCC	GGAACG	8	6.21633	2.45402	1.28693	0.726835	0.467327	unknown
ACTCAA	TTGAGT	41	36.6997	5.9384	1.11718	0.724157	0.468969	unknown
ACGGCT	AGCCGT	11	8.818	3.01561	1.24745	0.723568	0.469331	unknown
GTAAAT	ATTTAC	56	50.5517	7.53093	1.10778	0.723461	0.469397	unknown
GGACCC	GGGTCC	8	6.20967	2.47651	1.28831	0.722927	0.469725	unknown
GCATCC	GGATGC	10	7.95633	2.83133	1.25686	0.721804	0.470415	unknown
CAATCC	GGATTG	23	19.724	4.54093	1.16609	0.721438	0.47064	unknown
CCAACT	AGTTGG	27	23.341	5.07819	1.15676	0.720533	0.471197	unknown
CTACCT	AGGTAG	13	10.6503	3.26562	1.22062	0.719516	0.471823	unknown
ATATTA	TAATAT	103	92.5723	14.5072	1.11264	0.718791	0.47227	unknown
ACCGTA	TACGGT	13	10.585	3.36569	1.22815	0.717534	0.473044	unknown
GGCAAC	GTTGCC	12	9.74067	3.15067	1.23195	0.717096	0.473315	unknown
GTGAAA	TTTCAC	50	45.0383	6.93577	1.11017	0.715374	0.474378	unknown
GGTTCG	CGAACC	14	11.3917	3.64838	1.22897	0.714929	0.474653	unknown
GTGCCC	GGGCAC	4	2.79133	1.69098	1.43301	0.714773	0.474749	MNF1 binding site
TAATCC	GGATTA	29	25.2867	5.20066	1.14685	0.714012	0.47522	unknown
AACAGT	ACTGTT	32	28.2427	5.26862	1.13304	0.713153	0.475751	unknown
ACTGTA	TACAGT	25	21.6637	4.69545	1.15401	0.710546	0.477365	unknown
GTCCAT	ATGGAC	20	17.0157	4.21213	1.17539	0.70851	0.478629	unknown
CGGGCC	GGCCCG	4	2.79267	1.7088	1.43232	0.70654	0.479852	unknown
CACTAC	GTAGTG	16	13.3263	3.78532	1.20063	0.706326	0.479985	unknown
GTTGCA	TGCAAC	24	20.726	4.65491	1.15797	0.703344	0.481841	unknown
TCCCCG	CGGGGA	5	3.631	1.95332	1.37703	0.700859	0.483391	unknown
CGAGTG	CACTCG	10	8.03567	2.80803	1.24445	0.699542	0.484213	unknown
CACTTC	GAAGTG	24	20.6983	4.72244	1.15951	0.699144	0.484462	unknown
GCCCCA	TGGGGC	6	4.564	2.05442	1.31464	0.698981	0.484564	unknown
ATTGCC	GGCAAT	15	12.43	3.67726	1.20676	0.698889	0.484621	unknown
GACTCA	TGAGTC	19	16.1397	4.09297	1.17722	0.69884	0.484652	GCN4 motif
CCGGCT	AGCCGG	6	4.44367	2.22991	1.35024	0.697937	0.485217	unknown
AGTAGT	ACTACT	30	26.0367	5.68032	1.15222	0.69773	0.485346	unknown
CGCTCA	TGAGCG	6	4.48367	2.17914	1.33819	0.69584	0.486529	unknown
AACCAA	TTGGTT	84	76.98	10.105	1.09119	0.694708	0.487238	Realpha
GCGACA	TGTCGC	8	6.286	2.46743	1.27267	0.694649	0.487276	unknown
GGGGCC	GGCCCC	3	2.00733	1.4299	1.49452	0.694219	0.487545	unknown
AACCCC	GGGGTT	14	11.6153	3.44354	1.2053	0.692504	0.488621	unknown
TATAAG	CTTATA	43	38.418	6.62248	1.11927	0.691886	0.489009	unknown
CGTGTT	AACACG	18	15.117	4.18734	1.19071	0.688504	0.491136	unknown
TCATGC	GCATGA	19	16.173	4.13692	1.1748	0.683359	0.49438	unknown
TACAAT	ATTGTA	52	47.075	7.21393	1.10462	0.682707	0.494792	unknown
TCGATA	TATCGA	21	18.1267	4.2091	1.15851	0.682648	0.494829	unknown
CCTCTA	TAGAGG	18	15.264	4.01136	1.17925	0.682063	0.495199	unknown
TTTGGG	CCCAAA	41	36.782	6.18578	1.11468	0.681886	0.495311	unknown
TCACCC	GGGTGA	12	9.69633	3.37934	1.23758	0.681692	0.495434	CE1
GGCGGA	TCCGCC	8	6.13767	2.73237	1.30343	0.681581	0.495504	unknown
AATCTA	TAGATT	60	54.5343	8.02257	1.10022	0.681286	0.49569	unknown
TGATTG	CAATCA	45	40.4993	6.65032	1.11113	0.67676	0.498559	unknown
CACATG	CATGTG	31	27.22	5.59095	1.13887	0.676093	0.498982	CATGTG moti/MYC binding site
GTGTGG	CCACAC	16	13.3423	3.93501	1.19919	0.67539	0.499428	unknown
AGCCGT	ACGGCT	10	8.02833	2.93605	1.24559	0.671537	0.501879	unknown
GTAATA	TATTAC	43	38.7867	6.27845	1.10863	0.671078	0.502171	unknown
GGACTA	TAGTCC	13	10.786	3.30099	1.20527	0.670709	0.502406	unknown
CGAAAC	GTTTCG	25	21.8163	4.75634	1.14593	0.669352	0.503271	unknown
CCGGGG	CCCCGG	3	2.01767	1.47017	1.48687	0.668175	0.504022	unknown
ACTTAC	GTAAGT	24	20.9253	4.60805	1.14694	0.667237	0.50462	unknown
ATTTGT	ACAAAT	92	84.771	10.8648	1.08528	0.665358	0.505822	unknown
GTCGTC	GACGAC	16	13.239	4.1511	1.20855	0.665125	0.505971	unknown
GGTATT	AATACC	22	19.113	4.3523	1.15105	0.663327	0.507121	S1F box
TTACTA	TAGTAA	47	42.1903	7.27602	1.114	0.66103	0.508593	unknown
GCTAGG	CCTAGC	8	6.25567	2.63906	1.27884	0.660968	0.508633	unknown
ATTTAC	GTAAAT	55	49.9683	7.61836	1.1007	0.660466	0.508955	unknown
GTCGTG	CACGAC	10	8.09133	2.89352	1.23589	0.659635	0.509488	unknown
TGGGGC	GCCCCA	6	4.518	2.24723	1.32802	0.65948	0.509588	unknown
CATAGT	ACTATG	24	20.849	4.78802	1.15113	0.6581	0.510474	unknown
GGTTAT	ATAACC	29	25.6027	5.1653	1.13269	0.657722	0.510717	unknown
CACTCA	TGAGTG	22	19.076	4.44599	1.15328	0.657672	0.510749	unknown
CTTACA	TGTAAG	30	26.5757	5.21869	1.12885	0.656168	0.511716	unknown
TCGACA	TGTCGA	16	13.5757	3.69732	1.17858	0.6557	0.512017	unknown
GTGACC	GGTCAC	12	9.94167	3.14434	1.20704	0.654615	0.512716	unknown
GATTAA	TTAATC	53	48.3227	7.15693	1.09679	0.653539	0.513409	unknown
GCAAAC	GTTTGC	24	21.0347	4.53817	1.14097	0.65342	0.513485	unknown
GCCGTA	TACGGC	6	4.57	2.18861	1.31291	0.653382	0.51351	unknown
TCGGTC	GACCGA	10	8.15533	2.82498	1.22619	0.652983	0.513767	unknown
GAGTGG	CCACTC	15	12.6123	3.65839	1.18931	0.652654	0.513979	unknown
TCCGCG	CGCGGA	4	2.88833	1.70455	1.38488	0.652175	0.514288	PE3/Octamer motif
CGACAA	TTGTCG	21	18.166	4.3508	1.15601	0.651375	0.514804	unknown
TACCAA	TTGGTA	43	38.873	6.34804	1.10617	0.650122	0.515614	unknown
GCCCGC	GCGGGC	2	1.25833	1.14107	1.5894	0.649977	0.515707	unknown
CTCAAC	GTTGAG	26	22.9187	4.75972	1.13445	0.647377	0.517388	unknown
CCCCGA	TCGGGG	4	2.90433	1.70083	1.37725	0.644196	0.519448	unknown
GTCCGT	ACGGAC	7	5.45567	2.40277	1.28307	0.642731	0.520399	unknown
CAATGT	ACATTG	37	33.2663	5.80965	1.11224	0.642667	0.52044	WUS
GGGTTC	GAACCC	12	9.956	3.18257	1.2053	0.642248	0.520712	unknown
TAGAAG	CTTCTA	35	31.3097	5.76607	1.11787	0.640009	0.522167	unknown
CTGTCT	AGACAG	21	18.1277	4.51732	1.15845	0.635849	0.524875	unknown
TAAACC	GGTTTA	52	47.1087	7.70658	1.10383	0.634696	0.525627	unknown
TGCAGA	TCTGCA	26	22.5737	5.39854	1.15178	0.634677	0.525639	unknown
GTGATA	TATCAC	27	23.8477	4.97581	1.13219	0.633531	0.526387	unknown
GGTACG	CGTACC	8	6.36667	2.57962	1.25654	0.633168	0.526624	unknown
TTTCAT	ATGAAA	90	83.8963	9.64437	1.07275	0.632873	0.526816	unknown
TTTCGC	GCGAAA	15	12.738	3.57439	1.17758	0.632835	0.526842	unknown
ATGGTC	GACCAT	21	18.236	4.38391	1.15157	0.630487	0.528376	unknown
ATCTTT	AAAGAT	84	78.1397	9.29647	1.075	0.630383	0.528444	OSE
GAATAT	ATATTC	54	49.4937	7.22076	1.09105	0.62408	0.532575	unknown
AGTGGT	ACCACT	22	19.232	4.45423	1.14393	0.621432	0.534315	unknown
AGTACG	CGTACT	9	7.29333	2.7489	1.234	0.620853	0.534696	unknown
ACGAAT	ATTCGT	28	24.8597	5.06996	1.12632	0.619399	0.535653	unknown
ATGCAC	GTGCAT	15	12.7613	3.6241	1.17543	0.617717	0.536762	RY repeat
AGACAC	GTGTCT	21	18.405	4.20145	1.14099	0.617644	0.53681	unknown
GTCTAC	GTAGAC	14	11.8623	3.46526	1.18021	0.616884	0.537311	unknown
ACAATA	TATTGT	60	54.8973	8.27488	1.09295	0.616645	0.537469	unknown
CGAAAT	ATTTCG	31	27.6777	5.38932	1.12004	0.616466	0.537587	unknown
TTGGGT	ACCCAA	28	24.8737	5.07296	1.12569	0.616274	0.537714	unknown
AACTTA	TAAGTT	53	48.2897	7.71196	1.09754	0.610783	0.541343	unknown
TCCACC	GGTGGA	21	17.669	5.46248	1.18852	0.609796	0.541997	unknown
CGCCCA	TGGGCG	4	2.95933	1.70763	1.35166	0.609423	0.542244	RE1
AAACAT	ATGTTT	94	87.7477	10.2656	1.07125	0.609055	0.542488	unknown
CTGGGG	CCCCAG	4	2.93	1.75693	1.36519	0.609018	0.542513	unknown
GAACCA	TGGTTC	32	28.4107	5.89386	1.12634	0.608995	0.542528	unknown
GAAGTG	CACTTC	23	20.13	4.71372	1.14257	0.608861	0.542617	unknown
TAGTCT	AGACTA	24	21.1573	4.67017	1.13436	0.608686	0.542733	unknown
CGACCG	CGGTCG	5	3.833	1.91877	1.30446	0.608203	0.543053	unknown
AGTATC	GATACT	23	20.0793	4.81374	1.14546	0.606735	0.544027	unknown
TGTCCA	TGGACA	21	18.3687	4.33724	1.14325	0.606683	0.544061	unknown
TTTAAT	ATTAAA	132	122.52	15.6599	1.07738	0.605368	0.544935	unknown
TATGAC	GTCATA	24	21.135	4.74534	1.13556	0.60375	0.54601	unknown
GTAAAC	GTTTAC	34	30.491	5.82408	1.11508	0.602499	0.546842	unknown
TACGAG	CTCGTA	13	10.9967	3.32992	1.18218	0.601616	0.547429	unknown
GCAACG	CGTTGC	10	8.20667	2.98154	1.21852	0.601479	0.547521	unknown
TTTCCG	CGGAAA	20	17.331	4.44125	1.154	0.600957	0.547868	unknown
AACTAA	TTAGTT	75	69.1853	9.6855	1.08404	0.600348	0.548275	Myb1
CGGAAC	GTTCCG	9	7.31367	2.81412	1.23057	0.599241	0.549012	unknown
TCGTAC	GTACGA	11	9.172	3.05246	1.1993	0.598861	0.549266	unknown
ATGGAC	GTCCAT	19	16.5047	4.17793	1.15119	0.597265	0.550331	unknown
CTGGCG	CGCCAG	4	2.92967	1.79326	1.36534	0.596864	0.550598	unknown
GGTCGG	CCGACC	8	6.401	2.67966	1.2498	0.596717	0.550696	DRE
GTGACA	TGTCAC	22	19.331	4.48376	1.13807	0.595259	0.55167	TGTCACA motif
AGCCCC	GGGGCT	5	3.81967	1.98791	1.30901	0.593755	0.552676	unknown
CCCTCT	AGAGGG	15	12.8267	3.66485	1.16944	0.593022	0.553167	unknown
AGGGGG	CCCCCT	5	3.793	2.03688	1.31822	0.592574	0.553466	unknown
GTATGA	TCATAC	26	23.119	4.9094	1.12462	0.586833	0.557316	unknown
TCGCTA	TAGCGA	9	7.357	2.8011	1.22332	0.586555	0.557503	unknown
TGTACA	TGTACA	28	25.0567	5.02008	1.11747	0.586312	0.557666	unknown
TTAGCA	TGCTAA	28	24.9727	5.18198	1.12123	0.584204	0.559083	unknown
ACCGCC	GGCGGT	8	6.07667	3.29612	1.31651	0.583514	0.559547	unknown
GCACGT	ACGTGC	8	6.41	2.72575	1.24805	0.583326	0.559674	unknown
AGTCGC	GCGACT	7	5.60633	2.39038	1.24859	0.583031	0.559873	unknown
ATCAAA	TTTGAT	111	103.993	12.0205	1.06738	0.582947	0.559929	unknown
CATAGG	CCTATG	11	9.225	3.0578	1.19241	0.580482	0.56159	unknown
GTAACG	CGTTAC	14	11.9407	3.54815	1.17246	0.580397	0.561647	unknown
CCCCAT	ATGGGG	12	9.824	3.75807	1.2215	0.579021	0.562575	unknown
TAACGC	GCGTTA	10	8.29067	2.96014	1.20618	0.57745	0.563636	unknown
CGGACC	GGTCCG	6	4.73433	2.1953	1.26734	0.576534	0.564255	unknown
ACGCGA	TCGCGT	6	4.71133	2.24195	1.27352	0.574797	0.565429	unknown
TTAGAC	GTCTAA	24	21.392	4.53952	1.12191	0.574511	0.565622	unknown
TGTGCA	TGCACA	18	15.685	4.05182	1.14759	0.571348	0.567764	unknown
GTCCCA	TGGGAC	12	10.1883	3.17441	1.17782	0.570709	0.568197	Site IIb
GCATGT	ACATGC	20	17.548	4.29781	1.13973	0.570523	0.568323	unknown
TCGTGT	ACACGA	18	15.683	4.06727	1.14774	0.569669	0.568902	unknown
CTAAGG	CCTTAG	11	9.21867	3.13817	1.19323	0.567634	0.570284	unknown
GAGGTG	CACCTC	13	10.9723	3.58039	1.1848	0.566326	0.571172	unknown
GGTCGT	ACGACC	9	7.39133	2.84726	1.21764	0.564987	0.572082	unknown
CCAATT	AATTGG	46	42.397	6.40597	1.08498	0.562444	0.573813	unknown
GGATGG	CCATCC	12	10.1453	3.3025	1.18281	0.561595	0.574392	PE3
CACTTG	CAAGTG	25	22.3373	4.74317	1.1192	0.561368	0.574547	unknown
CATAGA	TCTATG	29	26.0693	5.2221	1.11242	0.561205	0.574658	unknown
AATCAT	ATGATT	77	71.8977	9.09561	1.07097	0.560967	0.57482	unknown
GGTTGT	ACAACC	20	17.6467	4.19758	1.13336	0.56064	0.575043	unknown
CTATGA	TCATAG	25	22.326	4.77004	1.11977	0.560582	0.575083	unknown
TTTTTC	GAAAAA	139	131.891	12.7013	1.0539	0.559734	0.575661	GT-1 motif
GAAACC	GGTTTC	35	31.8217	5.69983	1.09988	0.557619	0.577104	unknown
ACATGT	ACATGT	47	43.1157	6.96705	1.09009	0.557529	0.577166	unknown
GGCCAA	TTGGCC	16	13.8143	3.93205	1.15822	0.555859	0.578307	unknown
GTCATT	AATGAC	32	28.9273	5.535	1.10622	0.555134	0.578803	unknown
ATAAGT	ACTTAT	43	39.3673	6.54502	1.09228	0.555027	0.578876	unknown
TCTACC	GGTAGA	16	13.8757	3.83098	1.1531	0.554514	0.579227	unknown
AGTTAG	CTAACT	25	22.354	4.77734	1.11837	0.553865	0.579671	unknown
GGTGCG	CGCACC	4	3.02833	1.75439	1.32086	0.553848	0.579683	unknown
TACAGC	GCTGTA	11	9.29933	3.07618	1.18288	0.55285	0.580366	unknown
AGTCAT	ATGACT	29	26.1317	5.20289	1.10976	0.551297	0.58143	unknown
AAACTA	TAGTTT	78	72.6633	9.70423	1.07344	0.549932	0.582366	unknown
CTATCG	CGATAG	9	7.51033	2.71214	1.19835	0.54926	0.582827	unknown
TCCTCC	GGAGGA	26	22.2913	6.75512	1.16637	0.549016	0.582995	unknown
AGCTAA	TTAGCT	35	31.814	5.80373	1.10014	0.548957	0.583035	unknown
TAACCT	AGGTTA	24	21.4557	4.64211	1.11859	0.548098	0.583625	unknown
CGTCTA	TAGACG	11	9.29567	3.1206	1.18335	0.546155	0.584959	unknown
GTTCTA	TAGAAC	23	20.504	4.57168	1.12173	0.54597	0.585087	unknown
TAGGAG	CTCCTA	15	12.9333	3.78862	1.15979	0.545493	0.585415	unknown
TGAGCG	CGCTCA	6	4.78833	2.2341	1.25305	0.542352	0.587576	unknown
ACAACT	AGTTGT	38	34.7237	6.05168	1.09435	0.541392	0.588237	unknown
CCAATC	GATTGG	27	24.2603	5.08191	1.11293	0.539101	0.589817	unknown
CCGCGT	ACGCGG	5	3.892	2.05599	1.28469	0.538914	0.589946	unknown
AGAGTT	AACTCT	41	37.646	6.22519	1.08909	0.538779	0.590039	unknown
TATGGA	TCCATA	33	29.9417	5.6895	1.10214	0.53754	0.590895	unknown
ACCGCT	AGCGGT	7	5.70033	2.42263	1.228	0.536468	0.591635	unknown
CTCCCT	AGGGAG	14	12.0587	3.65162	1.16099	0.531636	0.594978	unknown
CATATT	AATATG	61	56.691	8.11436	1.07601	0.531034	0.595395	unknown
AAGTAT	ATACTT	46	42.43	6.74336	1.08414	0.52941	0.596521	unknown
GCTATA	TATAGC	20	17.729	4.28987	1.1281	0.529386	0.596538	unknown
TCGAGT	ACTCGA	16	13.993	3.80654	1.14343	0.52725	0.59802	unknown
GTAGTT	AACTAC	28	25.3187	5.08682	1.1059	0.527114	0.598115	unknown
CGGGAC	GTCCCG	5	3.953	1.98732	1.26486	0.52684	0.598305	unknown
TTGACG	CGTCAA	17	14.866	4.05712	1.14355	0.525989	0.598896	unknown
CGTGGA	TCCACG	14	12.0127	3.77923	1.16544	0.525856	0.598988	unknown
CCATAA	TTATGG	37	33.9197	5.86043	1.09081	0.525615	0.599155	unknown
TGAACA	TGTTCA	39	35.9437	5.86065	1.08503	0.5215	0.602018	unknown
CACAGG	CCTGTG	9	7.55333	2.77484	1.19153	0.521352	0.602122	unknown
TCACAT	ATGTGA	45	41.526	6.67599	1.08366	0.520372	0.602804	unknown
TCGTCA	TGACGA	19	16.8397	4.16178	1.12829	0.519089	0.603699	unknown
GTGTGA	TCACAC	25	22.26	5.28082	1.12309	0.518859	0.603859	unknown
ACCTCC	GGAGGT	13	10.9357	3.98533	1.18877	0.517984	0.60447	unknown
TGATAG	CTATCA	24	21.574	4.69431	1.11245	0.516796	0.605299	unknown
TCCGGG	CCCGGA	5	3.77333	2.37455	1.32509	0.516588	0.605443	unknown
GTACAT	ATGTAC	25	22.4233	4.99751	1.11491	0.51559	0.606141	unknown
GTCCAG	CTGGAC	8	6.635	2.64955	1.20573	0.515182	0.606426	unknown
TAGTTG	CAACTA	32	29.1	5.66045	1.09966	0.512327	0.608422	unknown
TGCATT	AATGCA	35	32.073	5.72305	1.09126	0.511441	0.609042	L1 box
ACCCCC	GGGGGT	5	3.978	2.00354	1.25691	0.510096	0.609984	unknown
ACAATT	AATTGT	68	63.307	9.20918	1.07413	0.5096	0.610332	unknown
CTAAAA	TTTTAG	83	77.5473	10.7026	1.07031	0.509472	0.610421	unknown
CCTAAC	GTTAGG	18	15.974	3.97801	1.12683	0.509299	0.610542	unknown
CTTAGA	TCTAAG	24	21.7357	4.47651	1.10418	0.505826	0.612979	unknown
GTAACC	GGTTAC	16	14.1223	3.71806	1.13296	0.505012	0.61355	unknown
AATCCA	TGGATT	50	46.5137	6.94252	1.07495	0.502171	0.615547	unknown
ACAATC	GATTGT	37	34.1023	5.77647	1.08497	0.501632	0.615926	unknown
TGTTTT	AAAACA	139	132.291	13.3843	1.05071	0.501233	0.616207	unknown
AAAAGT	ACTTTT	94	88.6577	10.6729	1.06026	0.500552	0.616686	unknown
TTGTCC	GGACAA	23	20.6773	4.652	1.11233	0.499284	0.61758	unknown
GTTAAA	TTTAAC	60	56.1637	7.70411	1.06831	0.497959	0.618513	unknown
TCAACC	GGTTGA	25	22.661	4.71856	1.10322	0.495702	0.620105	unknown
TCTCTA	TAGAGA	48	44.5227	7.01669	1.0781	0.495581	0.62019	unknown
ATATCC	GGATAT	28	25.421	5.20994	1.10145	0.495015	0.620589	unknown
TATTGT	ACAATA	56	52.0597	7.98912	1.07569	0.493212	0.621863	unknown
AGTGTT	AACACT	36	33.004	6.07456	1.09078	0.493204	0.621868	unknown
TCTTAG	CTAAGA	26	23.664	4.7375	1.09872	0.493087	0.621951	unknown
AGGTGA	TCACCT	19	16.9187	4.23384	1.12302	0.491595	0.623005	unknown
CCCCCA	TGGGGG	8	6.66167	2.7244	1.2009	0.49124	0.623257	unknown
TACCCA	TGGGTA	15	13.2347	3.61533	1.13339	0.488291	0.625344	unknown
AATTTC	GAAATT	83	78.68	8.86806	1.05491	0.487142	0.626158	unknown
CGTCCA	TGGACG	10	8.55733	2.9653	1.16859	0.486517	0.626601	unknown
TACGTT	AACGTA	20	17.8547	4.41785	1.12016	0.485606	0.627247	GARE
TATCAT	ATGATA	57	53.2903	7.64056	1.06961	0.485523	0.627306	unknown
GACACT	AGTGTC	15	13.1957	3.72012	1.13674	0.48502	0.627662	unknown
CCCCCG	CGGGGG	2	1.41933	1.20054	1.40911	0.483669	0.62862	unknown
CATCCC	GGGATG	11	9.26033	3.59762	1.18786	0.48356	0.628698	unknown
TACACT	AGTGTA	25	22.553	5.0637	1.1085	0.483243	0.628923	unknown
GTCCAA	TTGGAC	25	22.7243	4.71456	1.10014	0.482689	0.629317	unknown
TCTACT	AGTAGA	29	26.554	5.07947	1.09211	0.481546	0.630128	unknown
GACCGA	TCGGTC	9	7.69733	2.70891	1.16924	0.480883	0.6306	unknown
CGTTAT	ATAACG	18	15.9967	4.18312	1.12523	0.478909	0.632003	unknown
GCGATA	TATCGC	8	6.773	2.56418	1.18116	0.478516	0.632283	unknown
AAATCA	TGATTT	101	95.6073	11.2924	1.0564	0.47755	0.632971	unknown
TATTCT	AGAATA	50	46.4527	7.43654	1.07636	0.477014	0.633352	unknown
TGTACC	GGTACA	14	12.346	3.47567	1.13397	0.475879	0.634161	unknown
CTTAAA	TTTAAG	64	59.792	8.84486	1.07038	0.475757	0.634248	unknown
TAAAAC	GTTTTA	87	81.8097	10.9764	1.06344	0.472863	0.636311	unknown
TAAGGA	TCCTTA	27	24.6373	5.00328	1.0959	0.472223	0.636767	unknown
TCGTGA	TCACGA	15	13.106	4.01183	1.14451	0.472104	0.636853	unknown
AAGGCA	TGCCTT	19	16.9563	4.33344	1.12053	0.471604	0.637209	unknown
GCAGTG	CACTGC	10	8.577	3.02122	1.16591	0.471002	0.63764	unknown
CAAACA	TGTTTG	67	63.032	8.43576	1.06295	0.470379	0.638085	unknown
ACCCGT	ACGGGT	7	5.84967	2.44998	1.19665	0.469528	0.638692	unknown
GTTGGA	TCCAAC	27	24.6523	5.00644	1.09523	0.468929	0.63912	unknown
CGGAAT	ATTCCG	13	11.4	3.4208	1.14035	0.467726	0.63998	unknown
AATGAA	TTCATT	81	76.9017	8.76761	1.05329	0.46744	0.640185	unknown
TCGCGA	TCGCGA	5	4.01733	2.10456	1.24461	0.466922	0.640555	unknown
GACCTA	TAGGTC	11	9.611	2.97545	1.14452	0.46682	0.640628	unknown
AAGAAT	ATTCTT	73	69.017	8.53626	1.05771	0.466598	0.640788	unknown
GCTAGT	ACTAGC	12	10.5163	3.18137	1.14108	0.466361	0.640957	unknown
ATTGAT	ATCAAT	68	64.1513	8.25493	1.05999	0.466227	0.641053	unknown
TTGTAT	ATACAA	64	60.2563	8.03887	1.06213	0.465695	0.641434	unknown
GACGTA	TACGTC	10	8.54967	3.11942	1.16964	0.464937	0.641977	TGA-box
CCAGGG	CCCTGG	4	3.08933	1.96094	1.29478	0.464402	0.64236	unknown
GTGTCA	TGACAC	19	17.073	4.15862	1.11287	0.463375	0.643096	ABRE
GCTTTA	TAAAGC	29	26.5597	5.26761	1.09188	0.463272	0.64317	unknown
TACTTA	TAAGTA	39	36.06	6.36547	1.08153	0.461867	0.644177	unknown
CGTGAA	TTCACG	17	15.1457	4.01802	1.12243	0.461504	0.644437	unknown
ACTAAT	ATTAGT	58	54.299	8.02324	1.06816	0.461285	0.644594	unknown
AGGGAG	CTCCCT	13	11.2913	3.70419	1.15133	0.461279	0.644598	unknown
TGTTAG	CTAACA	28	25.58	5.2525	1.09461	0.460733	0.64499	unknown
GTAATC	GATTAC	26	23.7363	4.91333	1.09537	0.460719	0.645	unknown
ATTGTC	GACAAT	30	27.5333	5.35965	1.08959	0.460229	0.645352	unknown
ACAGCC	GGCTGT	9	7.69633	2.83916	1.16939	0.459174	0.646109	unknown
CCTAGG	CCTAGG	5	3.97433	2.23577	1.25807	0.458753	0.646412	unknown
GGCGCC	GGCGCC	3	2.303	1.52205	1.30265	0.457936	0.646999	unknown
TGTAAC	GTTACA	32	29.4983	5.46375	1.08481	0.457866	0.647049	unknown
GAATAA	TTATTC	56	52.579	7.48913	1.06506	0.456795	0.647818	unknown
TGTCGT	ACGACA	18	16.1957	3.95507	1.11141	0.456207	0.648241	unknown
CTGCCC	GGGCAG	4	3.19767	1.76379	1.25091	0.454891	0.649188	unknown
CGTAAT	ATTACG	19	17.095	4.20839	1.11144	0.452667	0.650788	unknown
CTAGTA	TACTAG	21	18.9697	4.51865	1.10703	0.449323	0.653199	unknown
TTTTCC	GGAAAA	64	60.2087	8.44351	1.06297	0.449023	0.653415	unknown
ACGGTA	TACCGT	10	8.661	2.98413	1.1546	0.448707	0.653643	unknown
CATGAT	ATCATG	36	33.3993	5.80147	1.07787	0.448277	0.653953	unknown
GCGCTC	GAGCGC	3	2.32267	1.51217	1.29162	0.447922	0.654209	unknown
ACTGGT	ACCAGT	16	14.1933	4.03675	1.12729	0.447554	0.654475	unknown
TGTTTC	GAAACA	59	55.4787	7.89618	1.06347	0.445954	0.65563	unknown
GTAGAA	TTCTAC	31	28.584	5.42827	1.08452	0.445077	0.656264	unknown
AGGTGG	CCACCT	14	12.366	3.67295	1.13214	0.444874	0.656411	Site I
CGTATG	CATACG	10	8.69667	2.93011	1.14987	0.444808	0.656459	unknown
GTGGTG	CACCAC	20	17.842	4.85409	1.12095	0.444573	0.656628	unknown
CGGTCG	CGACCG	5	4.08733	2.05664	1.22329	0.443765	0.657212	unknown
TGATGA	TCATCA	59	55.3357	8.26376	1.06622	0.443422	0.657461	unknown
CACGGC	GCCGTG	6	4.994	2.27061	1.20144	0.443052	0.657728	unknown
TGTAGC	GCTACA	15	13.324	3.7948	1.12579	0.441657	0.658737	unknown
GTTATT	AATAAC	51	47.565	7.79684	1.07222	0.440563	0.659529	unknown
GAACAG	CTGTTC	19	17.056	4.43683	1.11398	0.438151	0.661277	unknown
ATCCTA	TAGGAT	23	20.9917	4.59434	1.09567	0.437132	0.662016	unknown
AAAACG	CGTTTT	49	45.8913	7.11644	1.06774	0.436829	0.662236	unknown
ACGCTA	TAGCGT	8	6.77533	2.80811	1.18075	0.436118	0.662751	unknown
TAATAC	GTATTA	39	36.3023	6.19756	1.07431	0.435279	0.66336	unknown
CCTATC	GATAGG	11	9.66933	3.05883	1.13762	0.435025	0.663545	unknown
ATAAAC	GTTTAT	71	66.969	9.28634	1.06019	0.434078	0.664231	unknown
AGTACC	GGTACT	11	9.67233	3.08255	1.13726	0.430704	0.666684	unknown
CCCGTC	GACGGG	4	3.21733	1.8204	1.24327	0.429941	0.667238	unknown
ACTCGT	ACGAGT	15	13.356	3.82502	1.12309	0.429801	0.66734	unknown
TGTAGA	TCTACA	30	27.7273	5.29355	1.08196	0.429328	0.667685	unknown
CGTTAG	CTAACG	11	9.63433	3.19469	1.14175	0.427481	0.669029	unknown
TGAAAA	TTTTCA	105	100.345	10.9061	1.04639	0.426825	0.669506	unknown
CATTTG	CAAATG	46	43.0723	6.86616	1.06797	0.426391	0.669823	unknown
AATATC	GATATT	58	54.3773	8.51174	1.06662	0.425608	0.670393	EE
CCATTA	TAATGG	36	33.3383	6.25696	1.07984	0.425393	0.67055	unknown
ATCAAC	GTTGAT	45	42.1407	6.72473	1.06785	0.425197	0.670693	unknown
ACGATA	TATCGT	19	17.2257	4.18624	1.10301	0.423849	0.671676	unknown
CTAGCA	TGCTAG	11	9.709	3.06237	1.13297	0.421569	0.67334	unknown
GCTATC	GATAGC	10	8.77667	2.90659	1.13938	0.420883	0.673841	unknown
CAAAAG	CTTTTG	68	64.6177	8.03714	1.05234	0.420838	0.673874	unknown
TTATCC	GGATAA	29	26.839	5.14962	1.08052	0.419643	0.674747	SRE
GCGGGC	GCCCGC	2	1.45767	1.2931	1.37206	0.419407	0.674919	unknown
GGCTCG	CGAGCC	6	4.99333	2.40663	1.2016	0.418288	0.675736	unknown
ACTAGT	ACTAGT	27	24.9467	4.91459	1.08231	0.417803	0.676091	unknown
AAAAGA	TCTTTT	147	141.597	13.0001	1.03816	0.415587	0.677712	unknown
TTCGAA	TTCGAA	35	32.5257	5.96131	1.07607	0.415066	0.678094	unknown
AGCATC	GATGCT	20	18.1317	4.50279	1.10304	0.414928	0.678194	unknown
TAATTG	CAATTA	54	50.8827	7.51974	1.06127	0.414554	0.678469	unknown
GACACA	TGTGTC	23	21.101	4.58554	1.09	0.414128	0.67878	unknown
ACACAC	GTGTGT	36	32.901	7.49728	1.09419	0.41335	0.67935	unknown
TCAAAT	ATTTGA	91	86.4387	11.0454	1.05277	0.412963	0.679633	unknown
TAATTC	GAATTA	48	45.2163	6.75742	1.06156	0.411942	0.680382	unknown
TCACCA	TGGTGA	32	29.7427	5.4955	1.0759	0.41076	0.681248	unknown
CCTTCA	TGAAGG	22	20.083	4.67162	1.09545	0.41035	0.681549	unknown
TATTAC	GTAATA	41	38.358	6.44006	1.06888	0.410245	0.681626	unknown
AAGCGC	GCGCTT	6	5.02667	2.37287	1.19363	0.410193	0.681664	unknown
TTCGCC	GGCGAA	9	7.80767	2.91116	1.15271	0.409574	0.682119	unknown
CGACCA	TGGTCG	12	10.6657	3.26192	1.12511	0.409064	0.682493	unknown
CTTCGC	GCGAAG	9	7.851	2.81533	1.14635	0.408122	0.683184	unknown
TAGGTG	CACCTA	13	11.5833	3.47646	1.1223	0.407503	0.683639	unknown
TGGGTA	TACCCA	13	11.5813	3.48608	1.1225	0.406952	0.684044	unknown
GCACTC	GAGTGC	7	5.98267	2.50395	1.17005	0.406291	0.684529	unknown
TAATTT	AAATTA	145	137.611	18.2366	1.0537	0.405193	0.685335	unknown
CAGATA	TATCTG	26	23.9497	5.06165	1.08561	0.405072	0.685425	unknown
TCGAAA	TTTCGA	37	34.6497	5.80771	1.06783	0.404692	0.685704	unknown
GAACCT	AGGTTC	18	16.3233	4.14518	1.10272	0.404486	0.685855	unknown
AAGTAC	GTACTT	23	21.0727	4.76777	1.09146	0.404242	0.686035	unknown
ATTAAC	GTTAAT	50	47.1937	6.95579	1.05946	0.403453	0.686615	unknown
TAACGT	ACGTTA	20	18.2217	4.42671	1.09759	0.401728	0.687884	GARE
GCGGAA	TTCCGC	8	6.98433	2.53276	1.14542	0.401011	0.688412	unknown
AGTGTA	TACACT	24	22.142	4.65293	1.08391	0.399319	0.689658	unknown
TCGACC	GGTCGA	10	8.819	2.95891	1.13392	0.399133	0.689795	unknown
GCCCGG	CCGGGC	2	1.483	1.30113	1.34862	0.397347	0.691112	unknown
GAATCA	TGATTC	45	42.2583	6.90204	1.06488	0.397226	0.691201	unknown
GATAAA	TTTATC	63	59.847	7.94296	1.05268	0.396955	0.6914	unknown
GGACGC	GCGTCC	3	2.36567	1.59838	1.26814	0.396861	0.69147	hex3
CGCCTA	TAGGCG	5	4.13767	2.18288	1.20841	0.395044	0.692811	unknown
GCTCTT	AAGAGC	24	22.027	5.03952	1.08957	0.391506	0.695423	unknown
TGGGGG	CCCCCA	7	6.034	2.47647	1.16009	0.390072	0.696483	unknown
ATGACG	CGTCAT	15	13.5663	3.68168	1.10568	0.389405	0.696976	unknown
CGCATA	TATGCG	9	7.87167	2.90735	1.14334	0.388097	0.697944	unknown
CAACTG	CAGTTG	17	15.479	3.93557	1.09826	0.386475	0.699145	unknown
TACGAC	GTCGTA	11	9.712	3.34317	1.13262	0.385263	0.700042	unknown
CCTACC	GGTAGG	8	6.98667	2.63327	1.14504	0.384819	0.700372	P (myb homolog) binding site
GACGAA	TTCGTC	23	21.061	5.05837	1.09207	0.383325	0.701479	unknown
CGGTAT	ATACCG	9	7.90733	2.85449	1.13818	0.382788	0.701877	unknown
TAGCGG	CCGCTA	5	4.22767	2.02679	1.18269	0.381063	0.703157	unknown
TCTTCC	GGAAGA	42	39.5047	6.54988	1.06317	0.380974	0.703223	unknown
ACGACT	AGTCGT	13	11.6777	3.47829	1.11324	0.380168	0.703821	unknown
TAGGCA	TGCCTA	11	9.794	3.17452	1.12314	0.3799	0.70402	unknown
TTGGGG	CCCCAA	16	14.4783	4.00777	1.1051	0.379679	0.704184	unknown
GTGTAC	GTACAC	13	11.6553	3.55801	1.11537	0.377927	0.705485	unknown
ACTACG	CGTAGT	9	7.92067	2.86143	1.13627	0.377201	0.706024	unknown
GCCAAA	TTTGGC	31	28.767	5.92524	1.07762	0.376863	0.706276	unknown
CGTTGG	CCAACG	12	10.7733	3.27804	1.11386	0.374208	0.70825	unknown
GTAGTG	CACTAC	14	12.633	3.66289	1.10821	0.373202	0.708998	unknown
CCATGG	CCATGG	15	13.4737	4.10807	1.11328	0.371545	0.710232	unknown
GCGAGG	CCTCGC	5	4.20133	2.15801	1.1901	0.370094	0.711313	unknown
GTGCAT	ATGCAC	14	12.647	3.6609	1.10698	0.369581	0.711695	RY repeat
GTAGAT	ATCTAC	25	23.173	4.95849	1.07884	0.368459	0.712531	unknown
GTATAC	GTATAC	19	17.414	4.30683	1.09108	0.368252	0.712685	unknown
TCCACT	AGTGGA	24	22.24	4.79306	1.07914	0.367198	0.713471	NRR
GTGCTC	GAGCAC	9	7.867	3.09028	1.14402	0.366633	0.713892	unknown
GCAATG	CATTGC	20	18.3227	4.57677	1.09154	0.366488	0.714001	unknown
GGTGGG	CCCACC	10	8.84733	3.15648	1.13028	0.365175	0.714981	unknown
TGAGAC	GTCTCA	20	18.443	4.29312	1.08442	0.362673	0.716849	unknown
CGCTGA	TCAGCG	6	5.11533	2.44486	1.17294	0.361847	0.717466	unknown
GATGAC	GTCATC	20	18.397	4.43064	1.08713	0.361798	0.717503	unknown
CTGCGC	GCGCAG	3	2.43367	1.56751	1.23271	0.361295	0.717879	unknown
CCGTAC	GTACGG	6	5.16933	2.2998	1.16069	0.361191	0.717957	unknown
TGCCTA	TAGGCA	12	10.803	3.31841	1.1108	0.360715	0.718313	unknown
TTACAG	CTGTAA	25	23.2383	4.89927	1.07581	0.359577	0.719163	unknown
TCATCC	GGATGA	22	20.359	4.56965	1.0806	0.359108	0.719514	unknown
CCGAAA	TTTCGG	20	18.3357	4.642	1.09077	0.358538	0.719941	LTRE-1
CCTAGC	GCTAGG	7	6.08967	2.54711	1.14949	0.357398	0.720794	unknown
TGGAAC	GTTCCA	21	19.347	4.64002	1.08544	0.356249	0.721654	unknown
CGCCAA	TTGGCG	11	9.63867	3.82217	1.14124	0.356168	0.721715	unknown
TATGAT	ATCATA	57	54.3503	7.43963	1.04875	0.356156	0.721724	unknown
CTCGTT	AACGAG	17	15.579	3.9973	1.09121	0.35549	0.722223	unknown
CCCCAG	CTGGGG	4	3.291	1.99841	1.21544	0.354782	0.722753	unknown
CTCACC	GGTGAG	15	13.6627	3.77451	1.09788	0.354306	0.723109	unknown
TAGTGA	TCACTA	28	26.2057	5.07477	1.06847	0.353579	0.723654	unknown
CCGTGT	ACACGG	7	6.13033	2.46171	1.14186	0.353277	0.723881	unknown
CAACCT	AGGTTG	19	17.4953	4.27357	1.086	0.352087	0.724773	unknown
ATGCAT	ATGCAT	39	36.7227	6.47377	1.06201	0.351778	0.725004	RY repeat
TTAAAG	CTTTAA	58	55.1697	8.10552	1.0513	0.349186	0.72695	unknown
TACTAC	GTAGTA	25	23.039	5.62909	1.08512	0.348369	0.727563	unknown
GAGATC	GATCTC	25	23.1607	5.2801	1.07942	0.348352	0.727576	unknown
GAGGTA	TACCTC	14	12.7117	3.70114	1.10135	0.348091	0.727772	unknown
TATGCA	TGCATA	29	27.1837	5.2304	1.06682	0.347265	0.728392	unknown
CCAGAT	ATCTGG	17	15.5927	4.06328	1.09026	0.346354	0.729077	unknown
GGATAT	ATATCC	26	24.2613	5.02283	1.07166	0.346153	0.729228	unknown
ACACTA	TAGTGT	28	26.2407	5.0951	1.06705	0.345299	0.72987	unknown
ACACGA	TCGTGT	18	16.5127	4.31819	1.09007	0.344435	0.730519	unknown
TGTTGC	GCAACA	24	22.2707	5.03513	1.07765	0.343454	0.731257	unknown
CCTTTC	GAAAGG	24	22.3923	4.69586	1.0718	0.342358	0.732081	unknown
CTCCGC	GCGGAG	7	6.019	2.86602	1.16298	0.342287	0.732135	unknown
GACAAC	GTTGTC	21	19.474	4.47698	1.07836	0.340855	0.733213	unknown
GACATA	TATGTC	26	24.3483	4.86562	1.06783	0.339457	0.734266	unknown
AGCGGG	CCCGCT	4	3.35033	1.91437	1.19391	0.339363	0.734336	BS1
TTCTCC	GGAGAA	41	38.7913	6.51116	1.05694	0.339212	0.73445	unknown
ATGGTT	AACCAT	40	37.871	6.31794	1.05622	0.336977	0.736134	unknown
CAATAT	ATATTG	56	53.184	8.39629	1.05295	0.335386	0.737334	unknown
TCCCGT	ACGGGA	7	6.16767	2.48239	1.13495	0.335295	0.737403	unknown
AATAAA	TTTATT	185	177.869	21.2717	1.04009	0.335234	0.737449	unknown
TACCGC	GCGGTA	5	4.28633	2.13398	1.1665	0.33443	0.738055	unknown
CCCATG	CATGGG	13	11.761	3.71301	1.10535	0.333691	0.738613	RE1
CAACAT	ATGTTG	44	41.6287	7.12398	1.05696	0.332867	0.739235	unknown
CCGCCA	TGGCGG	10	8.72667	3.82677	1.14591	0.332744	0.739328	unknown
ACGGTC	GACCGT	8	7.11067	2.67285	1.12507	0.332728	0.739339	unknown
AGCAAT	ATTGCT	30	28.088	5.81121	1.06807	0.329019	0.742141	unknown
TGATGT	ACATCA	38	35.9993	6.08306	1.05558	0.328891	0.742238	unknown
ACGTCG	CGACGT	10	8.98367	3.09051	1.11313	0.328856	0.742264	DRE/JASE2
GGGTGA	TCACCC	9	8.099	2.74075	1.11125	0.328742	0.74235	CE1
AATGAC	GTCATT	32	30.153	5.62905	1.06125	0.32812	0.742821	unknown
TTCGTG	CACGAA	16	14.762	3.77758	1.08386	0.327723	0.743121	unknown
ATCACG	CGTGAT	14	12.7567	3.7981	1.09747	0.327356	0.743398	unknown
ACCACT	AGTGGT	22	20.5257	4.51599	1.07183	0.32647	0.744069	unknown
ACCTTC	GAAGGT	21	19.4603	4.7446	1.07912	0.324509	0.745553	unknown
CTACGA	TCGTAG	11	9.98467	3.133	1.10169	0.324077	0.74588	unknown
GGTTAG	CTAACC	18	16.5913	4.3592	1.0849	0.323148	0.746583	unknown
ACCTGG	CCAGGT	7	6.177	2.54699	1.13324	0.323126	0.7466	Site I
CTACGG	CCGTAG	5	4.31	2.14323	1.16009	0.321944	0.747495	unknown
TATTCC	GGAATA	25	23.423	4.91719	1.06733	0.320711	0.748429	unknown
ATTCCA	TGGAAT	40	37.8497	6.70806	1.05681	0.32056	0.748544	unknown
TAAGCG	CGCTTA	8	7.13533	2.7052	1.12118	0.319631	0.749248	unknown
TATGTG	CACATA	33	31.1343	5.84349	1.05992	0.319273	0.74952	unknown
CGTTTA	TAAACG	23	21.471	4.81258	1.07121	0.317709	0.750705	unknown
TTTGTT	AACAAA	152	147.596	13.8879	1.02984	0.317135	0.751141	amylase box/GARE/TAACAAA box
AGCGAC	GTCGCT	7	6.20467	2.53461	1.12818	0.313789	0.753681	unknown
GAACCC	GGGTTC	13	11.8717	3.59632	1.09504	0.313747	0.753713	unknown
AATAAG	CTTATT	54	51.7317	7.23545	1.04385	0.313503	0.753899	unknown
GTTGTG	CACAAC	25	23.4463	4.98077	1.06626	0.311933	0.755091	unknown
CATTCT	AGAATG	32	30.3057	5.43655	1.05591	0.311656	0.755302	unknown
GGCTAG	CTAGCC	7	6.21233	2.54035	1.12679	0.310062	0.756514	unknown
AGGACT	AGTCCT	12	10.9297	3.46305	1.09793	0.309072	0.757266	unknown
ATCGAT	ATCGAT	27	25.44	5.05004	1.06132	0.308908	0.757391	unknown
TGAATA	TATTCA	55	52.678	7.64542	1.04408	0.303711	0.761348	unknown
TCGATC	GATCGA	18	16.749	4.11983	1.07469	0.303653	0.761392	unknown
CCTCCA	TGGAGG	18	16.5327	4.86122	1.08875	0.301845	0.762771	unknown
CCATAT	ATATGG	35	33.13	6.19779	1.05644	0.301721	0.762865	unknown
TGATTT	AAATCA	90	87.1	9.61562	1.0333	0.301593	0.762963	unknown
AGCATA	TATGCT	23	21.5597	4.79028	1.06681	0.300678	0.76366	unknown
ACGAGG	CCTCGT	11	9.98333	3.3913	1.10184	0.299787	0.76434	unknown
CACCAG	CTGGTG	12	10.903	3.66307	1.10061	0.299476	0.764577	unknown
TTCCTC	GAGGAA	38	36.0423	6.54682	1.05432	0.299026	0.76492	unknown
AGAGTA	TACTCT	29	27.365	5.49453	1.05975	0.297569	0.766032	unknown
GTCATA	TATGAC	22	20.631	4.6141	1.06636	0.296699	0.766696	unknown
TTTTAT	ATAAAA	161	155.239	19.4451	1.03711	0.296288	0.76701	unknown
GTTAGT	ACTAAC	25	23.5573	4.90891	1.06124	0.293887	0.768844	Myb1
GGTCTG	CAGACC	9	8.16	2.8605	1.10294	0.293655	0.769022	unknown
CGCATT	AATGCG	10	9.12433	3.00065	1.09597	0.291826	0.77042	unknown
GCCATC	GATGGC	11	10.0523	3.24825	1.09427	0.291747	0.77048	unknown
ACTCTC	GAGAGT	30	28.3693	5.61469	1.05748	0.290429	0.771488	unknown
CGAAGC	GCTTCG	12	10.998	3.45099	1.09111	0.290352	0.771547	unknown
CGTCGC	GCGACG	6	5.285	2.46545	1.13529	0.290007	0.771811	unknown
GATATT	AATATC	54	51.7113	7.92054	1.04426	0.288953	0.772617	EE
AGGTTC	GAACCT	16	14.8537	3.97176	1.07718	0.288621	0.772871	unknown
GTAACT	AGTTAC	25	23.58	4.92494	1.06022	0.288328	0.773095	unknown
CTTGTG	CACAAG	28	26.4447	5.39487	1.05881	0.288298	0.773118	unknown
TATGCG	CGCATA	9	8.17367	2.87279	1.1011	0.287641	0.773621	unknown
ACAACG	CGTTGT	16	14.907	3.8005	1.07332	0.287593	0.773658	unknown
CTTTCG	CGAAAG	17	15.855	3.99123	1.07222	0.286879	0.774205	unknown
GCAGGA	TCCTGC	10	9.07733	3.21675	1.10165	0.286832	0.774241	unknown
GCATAT	ATATGC	26	24.5367	5.1199	1.05964	0.285813	0.775022	unknown
GCTAAT	ATTAGC	25	23.551	5.07188	1.06153	0.285693	0.775113	unknown
GCAGAC	GTCTGC	9	8.09967	3.15823	1.11116	0.285076	0.775586	unknown
TGGTGG	CCACCA	25	23.3397	5.85136	1.07114	0.283752	0.776601	unknown
GCACGG	CCGTGC	3	2.55767	1.56231	1.17294	0.283127	0.777079	unknown
CCTAGA	TCTAGG	13	11.9867	3.6015	1.08454	0.281364	0.778431	unknown
GCTATT	AATAGC	20	18.7917	4.29602	1.0643	0.281268	0.778505	unknown
TTGAGT	ACTCAA	35	33.3227	5.97303	1.05034	0.280818	0.77885	unknown
TCAAAC	GTTTGA	54	51.856	7.65934	1.04135	0.27992	0.779539	unknown
GCTAAC	GTTAGC	13	11.9467	3.76571	1.08817	0.279717	0.779694	unknown
CCGGGT	ACCCGG	5	4.40033	2.14964	1.13628	0.278962	0.780274	unknown
GTTCGT	ACGAAC	13	12.0087	3.55417	1.08255	0.278921	0.780305	unknown
ATCTTA	TAAGAT	49	46.9807	7.25152	1.04298	0.27847	0.780651	unknown
CTGACG	CGTCAG	8	7.23533	2.74696	1.10569	0.278368	0.78073	unknown
TTCATT	AATGAA	76	73.4263	9.25893	1.03505	0.277966	0.781039	unknown
AACTAC	GTAGTT	26	24.586	5.1357	1.05751	0.275328	0.783064	unknown
CTACAT	ATGTAG	25	23.6297	4.98907	1.05799	0.274667	0.783572	unknown
GCCGTG	CACGGC	5	4.408	2.17542	1.1343	0.272132	0.785521	unknown
TTGCTA	TAGCAA	28	26.5933	5.17154	1.0529	0.272001	0.785621	unknown
ATGCGC	GCGCAT	4	3.491	1.87237	1.1458	0.271849	0.785738	unknown
CAGTAG	CTACTG	12	11.082	3.38818	1.08284	0.270942	0.786436	unknown
CTATCC	GGATAG	11	10.1037	3.31158	1.08871	0.270666	0.786648	unknown
AAGTAG	CTACTT	29	27.5813	5.29006	1.05144	0.268176	0.788564	unknown
CTTTTT	AAAAAG	133	129.609	12.678	1.02616	0.267472	0.789106	unknown
CCAGCG	CGCTGG	4	3.48233	1.94138	1.14866	0.266649	0.789739	unknown
CAAGGC	GCCTTG	12	11.075	3.47353	1.08352	0.2663	0.790008	unknown
AGGAGC	GCTCCT	12	11.094	3.43148	1.08167	0.264026	0.79176	unknown
TACGGC	GCCGTA	5	4.44967	2.08764	1.12368	0.263615	0.792077	unknown
GACACC	GGTGTC	9	8.248	2.86308	1.09117	0.262654	0.792817	unknown
TTGTTG	CAACAA	69	66.4137	9.85875	1.03894	0.262339	0.79306	unknown
CGCCTT	AAGGCG	8	7.277	2.76312	1.09935	0.261661	0.793583	unknown
TGTGTA	TACACA	36	34.4397	6.00697	1.04531	0.259754	0.795054	SPBF binding site
ATCATT	AATGAT	67	64.798	8.49474	1.03398	0.259219	0.795466	unknown
AGAACC	GGTTCT	25	23.6563	5.18368	1.0568	0.259211	0.795472	unknown
GTTGGT	ACCAAC	27	25.6557	5.19995	1.0524	0.258528	0.795999	unknown
ATGTGG	CCACAT	23	21.8107	4.61273	1.05453	0.257837	0.796532	unknown
CATAAG	CTTATG	26	24.6733	5.16193	1.05377	0.25701	0.797171	unknown
AGGTCC	GGACCT	8	7.299	2.72985	1.09604	0.256791	0.79734	unknown
CCGCGG	CCGCGG	3	2.55367	1.74226	1.17478	0.256181	0.797811	unknown
CAGTCT	AGACTG	14	13.0597	3.67232	1.072	0.25606	0.797905	unknown
CCCGAT	ATCGGG	6	5.41733	2.28157	1.10756	0.25538	0.79843	unknown
ATGGCT	AGCCAT	18	16.947	4.12624	1.06213	0.255196	0.798572	unknown
ATAGAC	GTCTAT	21	19.8407	4.56314	1.05843	0.254065	0.799445	unknown
TTCCAA	TTGGAA	52	50.2293	7.03808	1.03525	0.251584	0.801363	unknown
CGGAGT	ACTCCG	7	6.36367	2.52986	1.09999	0.251529	0.801405	unknown
GGCTCC	GGAGCC	6	5.36433	2.5416	1.1185	0.250105	0.802506	unknown
GGGGAC	GTCCCC	5	4.45867	2.18492	1.12141	0.247759	0.804321	unknown
CTAATC	GATTAG	32	30.574	5.78495	1.04664	0.246502	0.805294	unknown
TTGGCT	AGCCAA	26	24.7397	5.1223	1.05094	0.246048	0.805645	unknown
TAGCAT	ATGCTA	20	18.944	4.29438	1.05574	0.245903	0.805757	unknown
GCGAAA	TTTCGC	14	13.092	3.70524	1.06936	0.245059	0.806411	unknown
AACGGT	ACCGTT	17	16.012	4.03195	1.0617	0.245043	0.806423	unknown
CGCCAT	ATGGCG	11	10.131	3.55669	1.08578	0.244328	0.806977	unknown
TGTCCT	AGGACA	15	14.0703	3.80538	1.06607	0.244304	0.806996	unknown
ACATTT	AAATGT	79	76.405	10.6609	1.03396	0.243413	0.807686	L1 box
CGCTCT	AGAGCG	8	7.33133	2.75719	1.09121	0.242518	0.808379	unknown
TGATCG	CGATCA	14	13.102	3.71414	1.06854	0.241778	0.808952	unknown
TAGAGT	ACTCTA	23	21.8133	4.92936	1.0544	0.240734	0.809761	unknown
TAAGCC	GGCTTA	15	14.058	3.93071	1.06701	0.239652	0.8106	unknown
TTATCT	AGATAA	59	57.1497	7.75401	1.03238	0.238629	0.811393	unknown
TAGTGT	ACACTA	25	23.7983	5.0462	1.05049	0.238133	0.811778	unknown
TGTCTA	TAGACA	24	22.7917	5.08562	1.05302	0.237598	0.812193	unknown
AGCACG	CGTGCT	6	5.43367	2.38443	1.10423	0.237513	0.812259	unknown
CGAAGG	CCTTCG	9	8.29033	2.99249	1.0856	0.237149	0.812541	unknown
CAACCA	TGGTTG	31	29.6707	5.62139	1.0448	0.236478	0.813062	unknown
ACTTGA	TCAAGT	37	35.5437	6.18834	1.04097	0.235335	0.813949	unknown
TCATTC	GAATGA	35	33.5903	6.00132	1.04197	0.234893	0.814292	unknown
GGTCTA	TAGACC	13	12.1723	3.53518	1.068	0.234123	0.814889	unknown
TTGACA	TGTCAA	40	38.5413	6.2404	1.03785	0.233746	0.815182	unknown
CTTCTA	TAGAAG	32	30.7	5.58239	1.04235	0.232875	0.815858	unknown
CCGTCT	AGACGG	9	8.331	2.89694	1.0803	0.230934	0.817366	unknown
ATGTTG	CAACAT	42	40.521	6.41503	1.0365	0.230552	0.817663	unknown
GAGTTG	CAACTC	21	19.9463	4.5725	1.05283	0.230436	0.817753	CAREs
GCCTTA	TAAGGC	12	11.2273	3.37453	1.06882	0.22897	0.818892	unknown
TCGTTA	TAACGA	20	19.0117	4.31931	1.05199	0.228818	0.819011	unknown
GCTACA	TGTAGC	14	13.1593	3.68589	1.06388	0.228077	0.819587	unknown
GATCGG	CCGATC	10	9.29033	3.11758	1.07639	0.227634	0.819931	unknown
ACTTCG	CGAAGT	11	10.227	3.40353	1.07558	0.227117	0.820333	unknown
AACCAG	CTGGTT	22	20.917	4.81434	1.05178	0.224953	0.822016	unknown
ACGGGT	ACCCGT	7	6.38033	2.76856	1.09712	0.223823	0.822895	unknown
CTGACA	TGTCAG	13	12.2047	3.57086	1.06517	0.222729	0.823747	unknown
GTACGG	CCGTAC	6	5.44767	2.48448	1.10139	0.222313	0.82407	unknown
GAATAC	GTATTC	20	19.0353	4.34546	1.05068	0.221994	0.824319	unknown
CATGTC	GACATG	21	20.0037	4.52804	1.04981	0.220036	0.825843	unknown
TTCCTG	CAGGAA	15	14.1063	4.06381	1.06335	0.219909	0.825942	unknown
ACCCCG	CGGGGT	3	2.62767	1.69666	1.1417	0.219451	0.826299	unknown
ATGAGT	ACTCAT	29	27.7917	5.50694	1.04348	0.21942	0.826323	ACTCAT motif
CGCGAA	TTCGCG	5	4.53567	2.1253	1.10237	0.218479	0.827056	pE2F
TTTATG	CATAAA	63	61.2203	8.17166	1.02907	0.217785	0.827596	unknown
AGTTCC	GGAACT	16	15.1053	4.15636	1.05923	0.215252	0.829571	unknown
TTATAA	TTATAA	100	96.669	15.503	1.03446	0.214862	0.829875	unknown
AAGCAT	ATGCTT	34	32.752	5.84425	1.0381	0.213543	0.830903	unknown
CTGAAC	GTTCAG	16	15.1603	3.94535	1.05539	0.212824	0.831464	unknown
TGGGCG	CGCCCA	3	2.65933	1.60566	1.1281	0.212166	0.831977	RE1
AAGCAC	GTGCTT	16	15.162	3.95141	1.05527	0.212076	0.832048	unknown
GGACCT	AGGTCC	8	7.42033	2.74496	1.07812	0.211175	0.832751	unknown
AGTCTT	AAGACT	31	29.8227	5.60164	1.03948	0.210177	0.83353	unknown
AGGTTG	CAACCT	17	16.1497	4.06835	1.05265	0.209012	0.834439	unknown
CTCATT	AATGAG	36	34.7627	5.94285	1.03559	0.208205	0.835069	unknown
CGGGTG	CACCCG	4	3.589	1.97823	1.11452	0.207762	0.835415	unknown
TCACTA	TAGTGA	29	27.87	5.46123	1.04055	0.206913	0.836078	unknown
ACCCAA	TTGGGT	31	29.849	5.60613	1.03856	0.205311	0.837329	unknown
AGGGCA	TGCCCT	7	6.45267	2.66923	1.08482	0.205053	0.837531	MNF1 binding site
TTATTT	AAATAA	170	165.934	19.8438	1.02451	0.204918	0.837637	unknown
AACTAG	CTAGTT	25	23.9577	5.13102	1.04351	0.203144	0.839023	unknown
CCTTAG	CTAAGG	11	10.3363	3.29244	1.06421	0.201573	0.840251	unknown
AGACAT	ATGTCT	32	30.8427	5.77457	1.03752	0.200419	0.841153	unknown
ACTATC	GATAGT	20	19.101	4.50054	1.04707	0.199754	0.841673	unknown
CTCGTC	GACGAG	13	12.1907	4.05419	1.06639	0.199629	0.841771	unknown
ACTGGC	GCCAGT	6	5.49633	2.55633	1.09164	0.197027	0.843806	unknown
CCGAAT	ATTCGG	14	13.2363	3.8907	1.05769	0.19628	0.844391	unknown
CCGATG	CATCGG	9	8.39633	3.12802	1.0719	0.192987	0.846969	unknown
GTTTAG	CTAAAC	35	33.808	6.21069	1.03526	0.191927	0.847799	unknown
CGTCTT	AAGACG	19	18.1563	4.43784	1.04647	0.190107	0.849225	unknown
ATTGAA	TTCAAT	71	69.3713	8.57286	1.02348	0.189979	0.849325	unknown
ACATCC	GGATGT	15	14.2813	3.7968	1.05032	0.189282	0.849871	unknown
CCCCCT	AGGGGG	4	3.644	1.88444	1.09769	0.188916	0.850159	unknown
TGAGTC	GACTCA	17	16.2237	4.11306	1.04785	0.188748	0.85029	GCN4 motif
AGTAAC	GTTACT	27	25.9983	5.3126	1.03853	0.188545	0.850449	unknown
ACGAGC	GCTCGT	9	8.433	3.01505	1.06724	0.188056	0.850832	unknown
AGGGTA	TACCCT	11	10.384	3.28209	1.05932	0.187685	0.851124	unknown
ATCTCG	CGAGAT	15	14.2817	3.83248	1.0503	0.187433	0.851321	unknown
TTGTAG	CTACAA	32	30.9833	5.43325	1.03281	0.187119	0.851567	unknown
TCCAAT	ATTGGA	41	39.8387	6.23198	1.02915	0.186351	0.85217	unknown
GATAGT	ACTATC	19	18.1827	4.43793	1.04495	0.18417	0.85388	unknown
GATCGA	TCGATC	18	17.2033	4.33977	1.04631	0.183573	0.854348	unknown
TTTTGG	CCAAAA	86	84.184	9.95003	1.02157	0.182512	0.855181	unknown
GCGTTA	TAACGC	8	7.49967	2.75134	1.06671	0.181851	0.8557	unknown
GGGGGA	TCCCCC	6	5.53767	2.55984	1.08349	0.18061	0.856673	unknown
ATAAGG	CCTTAT	22	21.154	4.68518	1.03999	0.180569	0.856706	I-box core motif
TCCCCT	AGGGGA	10	9.452	3.08959	1.05798	0.17737	0.859218	unknown
CCCGTG	CACGGG	4	3.65733	1.93817	1.09369	0.176799	0.859666	unknown
TACTGG	CCAGTA	10	9.40067	3.39303	1.06375	0.176637	0.859794	unknown
AGCGCC	GGCGCT	3	2.687	1.78552	1.11649	0.175299	0.860845	unknown
TATTCA	TGAATA	53	51.6993	7.4246	1.02516	0.175183	0.860935	unknown
TTGTGA	TCACAA	45	43.7957	6.88891	1.0275	0.174822	0.861219	unknown
AGGGTG	CACCCT	7	6.555	2.55666	1.06789	0.174056	0.861822	unknown
CTCGCG	CGCGAG	3	2.70733	1.68838	1.1081	0.173342	0.862383	unknown
ACTCCC	GGGAGT	8	7.527	2.73065	1.06284	0.173219	0.862479	unknown
GGACGG	CCGTCC	6	5.58733	2.38697	1.07386	0.172883	0.862743	Box A
CGACTT	AAGTCG	13	12.386	3.56351	1.04957	0.172302	0.8632	DRE
ATGCGG	CCGCAT	6	5.57533	2.46719	1.07617	0.172126	0.863339	unknown
GATTAT	ATAATC	47	45.7997	7.0716	1.02621	0.16974	0.865215	unknown
GATTGG	CCAATC	25	24.1343	5.13567	1.03587	0.16856	0.866143	unknown
TCTTTT	AAAAGA	133	130.83	12.9769	1.01659	0.167246	0.867176	unknown
TTTACC	GGTAAA	32	31.0367	5.76377	1.03104	0.167136	0.867263	unknown
GCAATT	AATTGC	28	27.066	5.58964	1.03451	0.167095	0.867295	unknown
TGGGTG	CACCCA	10	9.47833	3.12391	1.05504	0.166992	0.867376	unknown
CATTAC	GTAATG	28	27.1157	5.2989	1.03261	0.16689	0.867457	unknown
TGGACA	TGTCCA	20	19.2263	4.63763	1.04024	0.166824	0.867509	unknown
GACTGT	ACAGTC	12	11.4177	3.49904	1.051	0.166426	0.867821	unknown
GAGTTT	AAACTC	46	44.8173	7.15353	1.02639	0.165326	0.868687	unknown
ATTCGG	CCGAAT	14	13.3517	3.92952	1.04856	0.16499	0.868952	unknown
AACGAT	ATCGTT	24	23.2227	4.73841	1.03347	0.164049	0.869692	unknown
ACGGAA	TTCCGT	15	14.34	4.02995	1.04603	0.163774	0.869909	unknown
GTAGGG	CCCTAC	6	5.616	2.35819	1.06838	0.162837	0.870647	unknown
CATACC	GGTATG	13	12.43	3.54297	1.04586	0.160882	0.872186	unknown
CGCTTT	AAAGCG	12	11.4663	3.32554	1.04654	0.160475	0.872507	unknown
ACTGCG	CGCAGT	5	4.65367	2.16162	1.07442	0.160219	0.872708	unknown
ATGAAT	ATTCAT	63	61.7193	8.14481	1.02075	0.157237	0.875058	unknown
TTGAAC	GTTCAA	37	36.05	6.07622	1.02635	0.156347	0.875759	unknown
TCTTGG	CCAAGA	25	24.222	5.00224	1.03212	0.15553	0.876403	unknown
GCATCG	CGATGC	7	6.601	2.5719	1.06045	0.155138	0.876712	unknown
TTACCT	AGGTAA	26	25.1947	5.1978	1.03196	0.154937	0.876871	unknown
AGTAGG	CCTACT	11	10.494	3.26795	1.04822	0.154837	0.87695	unknown
CGAGAC	GTCTCG	10	9.51667	3.15474	1.05079	0.153209	0.878234	unknown
CTTCGT	ACGAAG	19	18.3427	4.33392	1.03584	0.151672	0.879446	unknown
TTTTAG	CTAAAA	67	65.5337	9.6722	1.02238	0.151603	0.8795	unknown
TCGACT	AGTCGA	11	10.5147	3.20882	1.04616	0.15125	0.879779	unknown
TCTCGG	CCGAGA	10	9.51933	3.19056	1.05049	0.150653	0.88025	DRE1
GGTCCC	GGGACC	6	5.621	2.52444	1.06743	0.150132	0.88066	Site IIb
CTAGGG	CCCTAG	7	6.59833	2.69445	1.06087	0.149072	0.881497	unknown
GAGGGC	GCCCTC	4	3.70733	1.97526	1.07894	0.148166	0.882212	unknown
TCAATA	TATTGA	53	51.8087	8.11414	1.02299	0.146822	0.883273	unknown
AAGTCT	AGACTT	31	30.1987	5.47825	1.02654	0.146275	0.883704	unknown
CCTGTA	TACAGG	8	7.596	2.78473	1.05319	0.145077	0.88465	unknown
TGTTAC	GTAACA	30	29.2193	5.41205	1.02672	0.144246	0.885306	unknown
TAGGGG	CCCCTA	6	5.65933	2.36442	1.0602	0.144081	0.885437	unknown
CCCTAC	GTAGGG	6	5.67567	2.34911	1.05714	0.138067	0.890188	unknown
CTACTC	GAGTAG	14	13.478	3.81021	1.03873	0.137	0.89103	unknown
CCCAAA	TTTGGG	44	42.9833	7.50021	1.02365	0.135552	0.892176	unknown
TGACCC	GGGTCA	11	10.5543	3.28785	1.04223	0.135549	0.892178	unknown
CGAAAG	CTTTCG	18	17.414	4.39807	1.03365	0.13324	0.894003	unknown
AACGGG	CCCGTT	7	6.63633	2.73604	1.0548	0.132917	0.894259	unknown
TGCTTG	CAAGCA	20	19.3847	4.63759	1.03174	0.132684	0.894443	unknown
TTATGG	CCATAA	30	29.2743	5.53401	1.02479	0.131129	0.895674	unknown
CAACGG	CCGTTG	13	12.4987	3.84607	1.04011	0.130349	0.89629	unknown
ACGCAA	TTGCGT	14	13.5	3.83852	1.03704	0.130258	0.896362	D4 element
CGCGCG	CGCGCG	2	1.79633	1.56514	1.11338	0.130127	0.896466	unknown
TAACGA	TCGTTA	21	20.4037	4.58429	1.02923	0.130082	0.896502	unknown
GCGACC	GGTCGC	3	2.78767	1.64727	1.07617	0.1289	0.897436	unknown
ATCTGT	ACAGAT	26	25.3123	5.3666	1.02717	0.128138	0.89804	unknown
CTCCGA	TCGGAG	11	10.569	3.38443	1.04078	0.127348	0.898665	unknown
TTATTC	GAATAA	51	50.0213	7.73275	1.01956	0.126561	0.899288	unknown
TGCGAA	TTCGCA	10	9.60567	3.11621	1.04105	0.126543	0.899302	unknown
TCCTCT	AGAGGA	37	36.1803	6.52329	1.02266	0.125652	0.900007	unknown
TATCCG	CGGATA	10	9.59733	3.23646	1.04196	0.124416	0.900986	Rebeta
TGAACT	AGTTCA	29	28.311	5.54135	1.02434	0.124338	0.901048	unknown
GCCTCC	GGAGGC	8	7.60967	3.14504	1.05129	0.124111	0.901228	unknown
ACCCTT	AAGGGT	18	17.4667	4.30175	1.03053	0.123981	0.901331	unknown
CGCAGC	GCTGCG	5	4.729	2.22828	1.05731	0.121619	0.903201	unknown
GCCACC	GGTGGC	9	8.57367	3.506	1.04973	0.121601	0.903215	unknown
TGGTCG	CGACCA	11	10.601	3.28817	1.03764	0.121344	0.903419	unknown
AGCGAA	TTCGCT	13	12.567	3.58764	1.03446	0.120692	0.903935	unknown
GCACAG	CTGTGC	6	5.713	2.43433	1.05024	0.117897	0.906149	unknown
ACTATG	CATAGT	21	20.45	4.67341	1.02689	0.117687	0.906316	unknown
CGGATA	TATCCG	11	10.6063	3.34919	1.03712	0.117541	0.906432	Rebeta
TCGGAC	GTCCGA	7	6.678	2.75139	1.04822	0.117032	0.906835	unknown
GTTAGC	GCTAAC	12	11.589	3.52754	1.03546	0.116512	0.907247	unknown
TAGCAA	TTGCTA	28	27.384	5.30307	1.02249	0.116159	0.907526	unknown
TTTGGC	GCCAAA	29	28.372	5.42237	1.02213	0.115817	0.907798	unknown
TAGCCA	TGGCTA	16	15.5563	3.87253	1.02852	0.114568	0.908788	unknown
TTGTCA	TGACAA	40	39.2807	6.41911	1.01831	0.112061	0.910775	unknown
CACAAG	CTTGTG	28	27.3643	5.69834	1.02323	0.111553	0.911178	unknown
CTTTGT	ACAAAG	51	50.175	7.4086	1.01644	0.111357	0.911333	unknown
TGTGAG	CTCACA	20	19.5077	4.42415	1.02524	0.111283	0.911392	unknown
GACTAT	ATAGTC	20	19.5073	4.44153	1.02526	0.110923	0.911678	unknown
CTCATG	CATGAG	19	18.5167	4.35822	1.0261	0.110902	0.911694	unknown
GATGCG	CGCATC	7	6.70367	2.67711	1.0442	0.110692	0.911861	unknown
TTTTCT	AGAAAA	150	148.525	13.3388	1.00993	0.110555	0.91197	unknown
CGTGCC	GGCACG	4	3.78133	1.9796	1.05783	0.11046	0.912045	unknown
GATACT	AGTATC	20	19.5203	4.37111	1.02457	0.109736	0.912619	unknown
GACGAG	CTCGTC	13	12.586	3.79808	1.03289	0.109002	0.913201	unknown
CGGCGC	GCGCCG	3	2.81133	1.74893	1.06711	0.107875	0.914094	PE3
ATTCAT	ATGAAT	62	61.1483	7.91116	1.01393	0.107654	0.91427	unknown
TAATCT	AGATTA	52	51.2367	7.1131	1.0149	0.107314	0.91454	unknown
CCGTGG	CCACGG	5	4.76133	2.23682	1.05013	0.106699	0.915028	unknown
AAACGG	CCGTTT	19	18.5417	4.41113	1.02472	0.103904	0.917246	unknown
CGAGGG	CCCTCG	4	3.79867	1.94304	1.053	0.103618	0.917473	unknown
CGCCCG	CGGGCG	1	0.901	0.957865	1.10988	0.103355	0.917681	unknown
CCGCTT	AAGCGG	7	6.726	2.6637	1.04074	0.102864	0.918071	unknown
GCTTAC	GTAAGC	13	12.637	3.57531	1.02873	0.10153	0.91913	unknown
TGGGAG	CTCCCA	13	12.6247	3.71444	1.02973	0.101047	0.919513	Box C
AATTCA	TGAATT	70	69.126	8.69364	1.01264	0.100533	0.919921	ERE
ACGGCC	GGCCGT	5	4.779	2.20283	1.04624	0.100326	0.920086	unknown
TGACCA	TGGTCA	26	25.4953	5.04689	1.01979	0.0999955	0.920348	unknown
GCCCTC	GAGGGC	4	3.79933	2.00858	1.05282	0.0999045	0.92042	unknown
ACTAAG	CTTAGT	19	18.5587	4.42633	1.02378	0.0997063	0.920577	unknown
ATCGCG	CGCGAT	4	3.79233	2.08854	1.05476	0.0994315	0.920796	unknown
CTCCTC	GAGGAG	26	25.317	6.93387	1.02698	0.098502	0.921534	unknown
TTGCCA	TGGCAA	21	20.5257	4.84271	1.02311	0.0979479	0.921974	unknown
CTAGTT	AACTAG	25	24.504	5.07496	1.02024	0.0977347	0.922143	unknown
GGCAGG	CCTGCC	4	3.802	2.0452	1.05208	0.0968119	0.922876	unknown
CGGCTT	AAGCCG	8	7.722	2.87451	1.036	0.0967122	0.922955	unknown
TGCGGG	CCCGCA	3	2.84	1.6951	1.05634	0.0943898	0.9248	unknown
GAGTGA	TCACTC	21	20.5487	4.78323	1.02196	0.0943575	0.924825	unknown
CCACCT	AGGTGG	13	12.642	3.89806	1.02832	0.0918405	0.926825	Site I
CCGACC	GGTCGG	7	6.759	2.66858	1.03566	0.0903104	0.928041	DRE
AAGATA	TATCTT	60	59.238	8.47821	1.01286	0.0898775	0.928385	unknown
ATTATT	AATAAT	122	120.683	14.6761	1.01092	0.0897602	0.928478	unknown
TCATAC	GTATGA	24	23.552	5.00669	1.01902	0.0894802	0.9287	unknown
GGGGCA	TGCCCC	4	3.82467	1.96194	1.04584	0.0893673	0.92879	unknown
ATACCT	AGGTAT	17	16.6533	4.1744	1.02082	0.0830458	0.933815	unknown
TCAACA	TGTTGA	50	49.386	7.4206	1.01243	0.0827426	0.934056	unknown
ATGTAT	ATACAT	55	54.338	8.05117	1.01218	0.0822241	0.934469	unknown
ATGATA	TATCAT	53	52.3503	7.95718	1.01241	0.0816453	0.934929	unknown
CCTGGT	ACCAGG	7	6.786	2.64245	1.03154	0.0809855	0.935453	unknown
TAGCAC	GTGCTA	9	8.76367	2.96121	1.02697	0.0798098	0.936388	unknown
TACTCT	AGAGTA	28	27.5827	5.25963	1.01513	0.0793465	0.936757	unknown
AGTCGA	TCGACT	11	10.747	3.26862	1.02354	0.0774027	0.938303	unknown
TTTCGA	TCGAAA	32	31.564	5.7086	1.01381	0.076376	0.93912	unknown
ATATTC	GAATAT	52	51.4373	7.38243	1.01094	0.076217	0.939246	unknown
TTAGTC	GACTAA	25	24.6167	5.0914	1.01557	0.0752903	0.939984	unknown
TTCGCA	TGCGAA	10	9.761	3.18495	1.02449	0.0750403	0.940183	unknown
ACAGCA	TGCTGT	14	13.704	3.95107	1.0216	0.0749165	0.940281	unknown
ACACAA	TTGTGT	56	55.4217	7.82268	1.01044	0.0739304	0.941066	unknown
GGCGCT	AGCGCC	3	2.878	1.65369	1.04239	0.0737744	0.94119	unknown
AAATTC	GAATTT	74	73.3013	9.47093	1.00953	0.0737696	0.941194	unknown
TAGCGA	TCGCTA	8	7.79633	2.79287	1.02612	0.0729238	0.941867	unknown
GCACAA	TTGTGC	18	17.706	4.14125	1.0166	0.0709931	0.943403	unknown
CTTTAA	TTAAAG	57	56.4263	8.21509	1.01017	0.0698308	0.944328	unknown
TACGGT	ACCGTA	9	8.79367	2.96626	1.02346	0.0695601	0.944544	unknown
CTCAAT	ATTGAG	31	30.61	5.82528	1.01274	0.0669496	0.946622	unknown
CTTACC	GGTAAG	16	15.7317	4.06216	1.01706	0.0660568	0.947333	unknown
ATTAGT	ACTAAT	52	51.4887	7.82272	1.00993	0.0653652	0.947883	unknown
ATCCTT	AAGGAT	29	28.6387	5.54049	1.01262	0.0652169	0.948001	unknown
TGCGAC	GTCGCA	6	5.83867	2.47548	1.02763	0.0651725	0.948037	unknown
CGAAGT	ACTTCG	10	9.80267	3.03251	1.02013	0.0650726	0.948116	unknown
TGCAGT	ACTGCA	14	13.7453	4.01354	1.01853	0.0634519	0.949407	unknown
TGACGC	GCGTCA	6	5.84033	2.54735	1.02734	0.0626795	0.950022	unknown
GCTTGT	ACAAGC	19	18.7257	4.48506	1.01465	0.061166	0.951227	unknown
TAGACG	CGTCTA	9	8.82067	3.01234	1.02033	0.0595329	0.952528	unknown
TGGATT	AATCCA	43	42.6193	6.52436	1.00893	0.0583454	0.953473	unknown
TTGTAA	TTACAA	67	66.4727	9.13395	1.00793	0.0577333	0.953961	unknown
ATTCAC	GTGAAT	34	33.674	5.65123	1.00968	0.0576866	0.953998	unknown
CCCGGT	ACCGGG	5	4.856	2.56348	1.02965	0.0561735	0.955204	unknown
AGAAGT	ACTTCT	37	36.6627	6.0216	1.0092	0.0560206	0.955325	unknown
CTTATG	CATAAG	24	23.721	4.98887	1.01176	0.0559245	0.955402	unknown
GTTAAT	ATTAAC	45	44.6007	7.20698	1.00895	0.0554093	0.955812	unknown
GGTGCA	TGCACC	9	8.83267	3.04824	1.01894	0.0548951	0.956222	unknown
AACGAG	CTCGTT	18	17.7717	4.32748	1.01285	0.0527635	0.95792	unknown
GGAGGT	ACCTCC	10	9.836	3.26609	1.01667	0.050213	0.959953	unknown
CGTCGT	ACGACG	13	12.8067	3.99541	1.0151	0.0483889	0.961406	unknown
GGAACA	TGTTCC	21	20.772	4.8751	1.01098	0.0467683	0.962698	unknown
AGTCCG	CGGACT	5	4.89733	2.2287	1.02096	0.0460657	0.963258	unknown
GGTATA	TATACC	18	17.807	4.25493	1.01084	0.0453591	0.963821	unknown
TCCTGC	GCAGGA	8	7.86267	3.04711	1.01747	0.04507	0.964052	unknown
TGTCCC	GGGACA	10	9.85967	3.18643	1.01423	0.0440409	0.964872	Site IIb
CCAACC	GGTTGG	16	15.823	4.08133	1.01119	0.0433683	0.965408	P (myb homolog) binding site
AGTTTA	TAAACT	53	52.7003	7.86319	1.00569	0.03811	0.9696	unknown
ATCCAC	GTGGAT	23	22.8143	4.93997	1.00814	0.0375846	0.970019	NRR/TATCCAC box
AGAATC	GATTCT	43	42.741	6.93387	1.00606	0.0373529	0.970204	unknown
CCTCAA	TTGAGG	22	21.8213	4.91258	1.00819	0.0363692	0.970988	unknown
CGCTAC	GTAGCG	4	3.92767	2.0412	1.01842	0.0354367	0.971732	unknown
AGCTCT	AGAGCT	22	21.817	5.19517	1.00839	0.035225	0.9719	unknown
AGCTAG	CTAGCT	17	16.8567	4.25168	1.0085	0.0337121	0.973107	unknown
ACGCAG	CTGCGT	7	6.905	2.83455	1.01376	0.0335151	0.973264	unknown
ATAGGG	CCCTAT	9	8.90067	3.0013	1.01116	0.0330968	0.973597	unknown
AAGACA	TGTCTT	45	44.767	7.09856	1.0052	0.0328236	0.973815	unknown
GGCCCC	GGGGCC	2	1.955	1.37099	1.02302	0.0328231	0.973816	unknown
TCATAT	ATATGA	61	60.7327	8.33173	1.0044	0.0320862	0.974403	unknown
AGGTAT	ATACCT	16	15.8697	4.0932	1.00821	0.0318414	0.974598	unknown
TGCAAG	CTTGCA	20	19.8527	4.6443	1.00742	0.0317235	0.974693	unknown
ACGGTT	AACCGT	14	13.885	3.64813	1.00828	0.031523	0.974852	unknown
GCCGGC	GCCGGC	4	3.93633	2.07743	1.01617	0.0306468	0.975551	unknown
ATAATC	GATTAT	51	50.7793	7.34129	1.00435	0.0300583	0.976021	unknown
GGGTGG	CCACCC	6	5.92267	2.57997	1.01306	0.0299745	0.976087	CE1
GCGCGT	ACGCGC	4	3.93733	2.11145	1.01592	0.0296794	0.976323	unknown
GCTCGT	ACGAGC	8	7.905	3.21664	1.01202	0.0295339	0.976439	unknown
ATGACA	TGTCAT	33	32.8333	5.66883	1.00508	0.0294006	0.976545	unknown
ATATCA	TGATAT	57	56.75	8.53197	1.00441	0.0293016	0.976624	unknown
CCGCTC	GAGCGG	4	3.942	1.99398	1.01471	0.0290875	0.976795	unknown
GTGCGT	ACGCAC	5	4.937	2.16824	1.01276	0.0290558	0.97682	unknown
GGGGAT	ATCCCC	8	7.91367	3.02003	1.01091	0.0285869	0.977194	unknown
CCTTTA	TAAAGG	26	25.8523	5.22446	1.00571	0.0282645	0.977451	unknown
TCCGTA	TACGGA	9	8.916	3.01982	1.00942	0.0278162	0.977809	unknown
AGTGCG	CGCACT	3	2.95267	1.734	1.01603	0.0272972	0.978223	unknown
CAAAAC	GTTTTG	86	85.734	9.99456	1.0031	0.0266145	0.978767	unknown
CTCACG	CGTGAG	9	8.91933	3.17052	1.00904	0.0254427	0.979702	unknown
AATGCG	CGCATT	9	8.92333	3.02652	1.00859	0.0253316	0.97979	unknown
CCGTCC	GGACGG	5	4.94467	2.38778	1.01119	0.0231735	0.981512	Box A
GCAAGA	TCTTGC	22	21.8883	4.87837	1.0051	0.0228902	0.981738	unknown
CATGGA	TCCATG	23	22.89	4.90434	1.00481	0.0224291	0.982106	unknown
ACATCT	AGATGT	29	28.8817	5.41191	1.0041	0.0218654	0.982555	unknown
AAGAAA	TTTCTT	170	169.685	14.4601	1.00186	0.0217841	0.98262	unknown
ATAGTG	CACTAT	21	20.901	4.57152	1.00474	0.0216558	0.982723	unknown
GGGGGT	ACCCCC	4	3.95567	2.04966	1.01121	0.0216296	0.982743	unknown
CGACCT	AGGTCG	6	5.94767	2.4543	1.0088	0.0213231	0.982988	DRE
AAGGTT	AACCTT	33	32.882	5.73176	1.00359	0.0205871	0.983575	unknown
GGTTAC	GTAACC	14	13.9243	3.68272	1.00543	0.0205464	0.983608	unknown
GCGGGA	TCCCGC	5	4.95267	2.36734	1.00956	0.0199943	0.984048	E2Fa element
CAATAG	CTATTG	23	22.9013	4.9849	1.00431	0.0197931	0.984208	unknown
TGTGTT	AACACA	49	48.8593	7.53117	1.00288	0.0186779	0.985098	unknown
CTGGTG	CACCAG	11	10.937	3.40855	1.00576	0.0184829	0.985254	unknown
ACAGTC	GACTGT	12	11.942	3.47659	1.00486	0.016683	0.986689	unknown
TTCGGC	GCCGAA	7	6.95533	2.73481	1.00642	0.0163327	0.986969	unknown
CAGCCA	TGGCTG	11	10.9513	3.37186	1.00444	0.0144332	0.988484	unknown
CATCGT	ACGATG	16	15.9433	4.0184	1.00355	0.0141018	0.988749	unknown
GCGGCA	TGCCGC	4	3.972	2.06639	1.00705	0.0135502	0.989189	E2Fb element
ACGCTG	CAGCGT	5	4.971	2.2752	1.00583	0.0127461	0.98983	unknown
CATGTT	AACATG	39	38.9327	6.38204	1.00173	0.0105504	0.991582	unknown
GTTTAC	GTAAAC	28	27.9423	5.48547	1.00206	0.0105126	0.991612	unknown
GCGGCG	CGCCGC	5	4.974	2.70316	1.00523	0.00961836	0.992326	unknown
CCAATA	TATTGG	35	34.9467	6.14164	1.00153	0.00868389	0.993071	unknown
ACTAGA	TCTAGT	24	23.9627	4.94673	1.00156	0.00754708	0.993978	unknown
CGATCA	TGATCG	14	13.972	3.76819	1.002	0.00743062	0.994071	unknown
TTGTGG	CCACAA	29	28.9593	5.53202	1.0014	0.00735115	0.994135	unknown
ATCTAC	GTAGAT	24	23.967	4.90067	1.00138	0.00673377	0.994627	unknown
TGGGAA	TTCCCA	24	23.9667	5.60197	1.00139	0.00595029	0.995252	unknown
GACGAT	ATCGTC	15	14.982	3.93465	1.0012	0.00457474	0.99635	unknown
CCCGAA	TTCGGG	8	7.98233	4.01556	1.00221	0.00439955	0.99649	unknown
AGTAAT	ATTACT	44	43.975	6.68829	1.00057	0.00373787	0.997018	unknown
CGTGAT	ATCACG	12	11.989	3.54472	1.00092	0.0031032	0.997524	unknown
GAACAA	TTGTTC	49	48.9863	7.55905	1.00028	0.00180799	0.998557	unknown
TCGGTT	AACCGA	24	23.9927	5.5964	1.00031	0.00131037	0.998954	unknown
GGGTAA	TTACCC	13	12.9993	3.85516	1.00005	0.000172928	0.999862	unknown
CCTGTC	GACAGG	6	6.00167	2.5577	0.999722	-0.000651626	1.00052	unknown
AGAATG	CATTCT	32	32.0093	5.94321	0.999708	-0.00157042	1.00125	unknown
CCAACA	TGTTGG	30	30.0113	5.76278	0.999622	-0.00196664	1.00157	unknown
CGAATA	TATTCG	19	19.01	4.53697	0.999474	-0.00220411	1.00176	unknown
TGTAAT	ATTACA	55	55.0213	7.66849	0.999612	-0.00278195	1.00222	unknown
CATCTC	GAGATG	29	29.027	5.55373	0.99907	-0.0048616	1.00388	unknown
AATCAC	GTGATT	39	39.0347	6.79025	0.999112	-0.00510536	1.00407	unknown
GCCTTG	CAAGGC	11	11.0193	3.61358	0.998246	-0.00535018	1.00427	unknown
GCCGAC	GTCGGC	5	5.01533	2.35605	0.996943	-0.00650808	1.00519	DRE
CCATGC	GCATGG	9	9.02167	3.08475	0.997598	-0.00702379	1.0056	unknown
TGAGTT	AACTCA	35	35.0463	6.20368	0.998678	-0.00746868	1.00596	unknown
TAATCG	CGATTA	17	17.0373	4.11123	0.997809	-0.00908081	1.00725	unknown
TGAACC	GGTTCA	23	23.0477	4.97946	0.997932	-0.00957266	1.00764	unknown
CACACA	TGTGTG	38	38.083	7.81058	0.997821	-0.0106266	1.00848	unknown
AACTGT	ACAGTT	26	26.0567	5.17607	0.997825	-0.0109478	1.00873	unknown
TGCGTC	GACGCA	6	6.03067	2.43428	0.994915	-0.0125979	1.01005	unknown
GCATCT	AGATGC	17	17.0653	4.58011	0.996172	-0.0142646	1.01138	unknown
GGGACG	CGTCCC	4	4.03267	2.06034	0.991899	-0.015855	1.01265	unknown
TTACTG	CAGTAA	21	21.077	4.63719	0.996347	-0.0166049	1.01325	unknown
CTCTCA	TGAGAG	32	32.099	5.77728	0.996916	-0.0171361	1.01367	unknown
CGTAGC	GCTACG	6	6.04433	2.43331	0.992665	-0.0182193	1.01454	unknown
ACCCAT	ATGGGT	19	19.0837	4.57919	0.995616	-0.0182711	1.01458	unknown
CAGCGG	CCGCTG	4	4.041	2.11238	0.989854	-0.0194094	1.01549	unknown
CTCTAA	TTAGAG	31	31.118	6.03005	0.996208	-0.0195687	1.01561	unknown
CTTACT	AGTAAG	22	22.0937	4.71893	0.99576	-0.0198491	1.01584	unknown
CCGACA	TGTCGG	9	9.065	3.13572	0.99283	-0.0207289	1.01654	DRE
ATAGCA	TGCTAT	19	19.0913	4.31724	0.995216	-0.0211555	1.01688	unknown
GGGCAA	TTGCCC	8	8.064	2.87495	0.992063	-0.0222613	1.01776	unknown
TGACAA	TTGTCA	39	39.1483	6.25188	0.996211	-0.0237262	1.01893	unknown
TCCCCC	GGGGGA	6	6.05967	2.51188	0.990153	-0.0237538	1.01895	unknown
CCAGCC	GGCTGG	5	5.057	2.27101	0.988728	-0.025099	1.02002	unknown
CCAGTA	TACTGG	9	9.081	3.22696	0.99108	-0.0251011	1.02003	unknown
TTTACT	AGTAAA	58	58.225	8.14513	0.996136	-0.0276239	1.02204	unknown
TCTAAA	TTTAGA	63	63.2583	9.17338	0.995916	-0.0281612	1.02247	unknown
ACAGTA	TACTGT	22	22.1357	4.78514	0.993871	-0.0283517	1.02262	unknown
CTGTAG	CTACAG	10	10.1007	3.25188	0.990034	-0.0309565	1.0247	unknown
GAAATG	CATTTC	41	41.2103	6.74927	0.994896	-0.0311639	1.02486	unknown
CGATTA	TAATCG	17	17.132	4.22017	0.992295	-0.0312784	1.02495	unknown
GTTAGA	TCTAAC	25	25.1643	5.05165	0.99347	-0.0325306	1.02595	unknown
CGAACG	CGTTCG	6	6.082	2.50839	0.986518	-0.0326902	1.02608	unknown
CTGTAT	ATACAG	20	20.151	4.56623	0.992507	-0.0330688	1.02638	unknown
CCCCGG	CCGGGG	2	2.04933	1.47839	0.975927	-0.0333697	1.02662	unknown
TCAAGG	CCTTGA	18	18.1517	4.50719	0.991644	-0.0336499	1.02684	unknown
AGCGGA	TCCGCT	6	6.08567	2.51272	0.985923	-0.0340932	1.0272	unknown
GATTAG	CTAATC	28	28.1817	5.32141	0.993554	-0.0341388	1.02723	unknown
ACCGAA	TTCGGT	19	19.1883	5.25174	0.990185	-0.0358612	1.02861	unknown
GGACTC	GAGTCC	8	8.112	2.99963	0.986193	-0.0373379	1.02978	unknown
GCAGTC	GACTGC	6	6.095	2.47979	0.984413	-0.0383097	1.03056	unknown
GACGGA	TCCGTC	10	10.1443	3.64992	0.985772	-0.0395442	1.03154	unknown
TGTACT	AGTACA	20	20.176	4.40168	0.991277	-0.0399847	1.03189	unknown
TGATAA	TTATCA	53	53.3087	7.67444	0.99421	-0.0402201	1.03208	unknown
ATTCGC	GCGAAT	9	9.13067	3.1402	0.985689	-0.0416109	1.03319	pE2F
CATTAA	TTAATG	54	54.3313	7.63883	0.993902	-0.0433749	1.0346	unknown
GGGTGC	GCACCC	3	3.08	1.82813	0.974026	-0.0437606	1.0349	CE1
AGATCA	TGATCT	35	35.2887	6.54362	0.99182	-0.0441142	1.03519	unknown
ATTTCC	GGAAAT	38	38.2877	6.46185	0.992487	-0.0445177	1.03551	unknown
ATGTCC	GGACAT	13	13.1703	3.75562	0.987067	-0.0453542	1.03618	unknown
GTTACG	CGTAAC	10	10.1527	3.29489	0.984963	-0.0463343	1.03696	unknown
AACATC	GATGTT	35	35.2737	5.90353	0.992242	-0.0463564	1.03697	unknown
GTCGAA	TTCGAC	14	14.1753	3.76661	0.987631	-0.0465494	1.03713	unknown
CGAGTT	AACTCG	15	15.1823	3.86946	0.98799	-0.0471211	1.03758	unknown
TTCAGC	GCTGAA	17	17.2183	4.50142	0.98732	-0.0485032	1.03868	unknown
CATATC	GATATG	30	30.2853	5.71339	0.990578	-0.0499412	1.03983	unknown
ACTGTG	CACAGT	13	13.1877	3.70878	0.98577	-0.0506007	1.04036	SPBF binding site
TGCTCG	CGAGCA	7	7.13867	2.73726	0.980575	-0.0506589	1.0404	unknown
GTATCG	CGATAC	8	8.15733	2.98545	0.980713	-0.0527001	1.04203	unknown
CGCGGA	TCCGCG	3	3.096	1.80699	0.968992	-0.0531271	1.04237	PE3/Octamer motif
GCTAAG	CTTAGC	13	13.204	3.78424	0.98455	-0.0539078	1.04299	unknown
GCACCC	GGGTGC	3	3.09833	1.8233	0.968263	-0.0539314	1.04301	CE1
ACTTGG	CCAAGT	23	23.2727	4.94852	0.988284	-0.0551007	1.04394	unknown
GGCAGA	TCTGCC	10	10.1867	3.33809	0.981675	-0.0559201	1.04459	unknown
TATTGA	TCAATA	50	50.4207	7.40932	0.991657	-0.0567753	1.04528	unknown
GTGTCG	CGACAC	9	9.184	3.17367	0.979965	-0.0579771	1.04623	ABRE
ACGGAC	GTCCGT	6	6.145	2.47791	0.976404	-0.0585171	1.04666	unknown
TGTGTC	GACACA	19	19.2833	4.59936	0.985307	-0.0616028	1.04912	unknown
AGGATT	AATCCT	26	26.34	5.50374	0.987092	-0.0617762	1.04926	unknown
CCCAGT	ACTGGG	6	6.16367	2.61518	0.973447	-0.0625834	1.0499	unknown
GCCTCA	TGAGGC	9	9.20267	3.20297	0.977977	-0.0632746	1.05045	unknown
GCGCGC	GCGCGC	1	1.08267	1.27032	0.923645	-0.0650756	1.05189	unknown
CCGCCT	AGGCGG	5	5.182	2.77875	0.964878	-0.0654971	1.05222	unknown
CTGTAC	GTACAG	9	9.21933	3.3084	0.976209	-0.0662958	1.05286	unknown
GGATTC	GAATCC	20	20.3143	4.72535	0.984527	-0.0665206	1.05304	unknown
TGGCGC	GCGCCA	4	4.13867	2.05155	0.966495	-0.0675913	1.05389	unknown
GAGACG	CGTCTC	14	14.302	4.41784	0.978884	-0.0683592	1.0545	unknown
TTGGTA	TACCAA	37	37.44	6.3125	0.988248	-0.0697029	1.05557	unknown
GGGCCT	AGGCCC	12	12.2667	3.78678	0.978261	-0.0704205	1.05614	unknown
ATGGCA	TGCCAT	15	15.2793	3.94569	0.981718	-0.0707945	1.05644	unknown
CTTTTC	GAAAAG	56	56.5397	7.55306	0.990455	-0.07145	1.05696	unknown
ATGGAT	ATCCAT	34	34.434	6.00458	0.987396	-0.0722781	1.05762	amylase box
AAGCTA	TAGCTT	30	30.4213	5.78645	0.98615	-0.0728138	1.05805	unknown
TGACAG	CTGTCA	14	14.296	4.05856	0.979295	-0.0729323	1.05814	unknown
TGCTCT	AGAGCA	20	20.3493	4.65237	0.982833	-0.0750872	1.05985	unknown
CCCGCG	CGCGGG	2	2.11133	1.47252	0.947269	-0.0756071	1.06027	unknown
TAGTTC	GAACTA	19	19.35	4.48734	0.981912	-0.0779972	1.06217	unknown
GCGGGT	ACCCGC	4	4.16267	2.07934	0.960922	-0.07823	1.06235	unknown
GACGGT	ACCGTC	9	9.247	3.10267	0.973289	-0.079609	1.06345	unknown
GCAAAT	ATTTGC	34	34.483	6.00403	0.985993	-0.0804459	1.06412	unknown
ATTATA	TATAAT	88	89.1057	13.6694	0.987592	-0.0808862	1.06447	unknown
CGTCCG	CGGACG	3	3.146	1.79734	0.953592	-0.0812312	1.06474	unknown
GGAGGC	GCCTCC	7	7.233	2.85659	0.967787	-0.0815658	1.06501	unknown
GGCACT	AGTGCC	5	5.19033	2.33036	0.963329	-0.0816755	1.0651	unknown
CCCTGC	GCAGGG	3	3.15167	1.8462	0.951877	-0.0821506	1.06547	unknown
GTCACT	AGTGAC	16	16.3443	4.14248	0.978933	-0.0831225	1.06625	unknown
CACTGG	CCAGTG	8	8.27333	3.27152	0.966962	-0.0835493	1.06659	unknown
TCCCAA	TTGGGA	27	27.459	5.48304	0.983284	-0.0837128	1.06672	unknown
TAGAGC	GCTCTA	12	12.299	3.53597	0.975689	-0.0845595	1.06739	unknown
ACAAGC	GCTTGT	20	20.4103	4.81737	0.979896	-0.0851779	1.06788	unknown
TCAGGA	TCCTGA	14	14.3603	4.22119	0.974908	-0.085363	1.06803	unknown
AAGGTC	GACCTT	14	14.3297	3.85001	0.976994	-0.0856274	1.06824	unknown
CCCGCA	TGCGGG	3	3.158	1.83888	0.949968	-0.0859217	1.06847	unknown
GACTCC	GGAGTC	8	8.23767	2.72011	0.971149	-0.087374	1.06963	unknown
TGGTGC	GCACCA	10	10.284	3.25016	0.972384	-0.0873803	1.06963	unknown
TTCTAC	GTAGAA	27	27.465	5.28861	0.983069	-0.0879247	1.07006	unknown
AGCTAT	ATAGCT	21	21.421	4.78512	0.980346	-0.087981	1.07011	unknown
AAATTA	TAATTT	140	141.678	18.8897	0.988159	-0.0888138	1.07077	unknown
GCGGAT	ATCCGC	6	6.231	2.59831	0.962927	-0.0889039	1.07084	PE3/Octamer motif
CTCAAG	CTTGAG	24	24.469	5.25029	0.980833	-0.0893284	1.07118	unknown
AATGTG	CACATT	37	37.56	6.26031	0.985091	-0.0894525	1.07128	unknown
TCGCTC	GAGCGA	7	7.242	2.70133	0.966584	-0.0895854	1.07138	unknown
GACTAA	TTAGTC	24	24.4583	5.10565	0.981261	-0.0897699	1.07153	unknown
TCGAAG	CTTCGA	18	18.406	4.51752	0.977942	-0.0898724	1.07161	unknown
GGTACC	GGTACC	5	5.20733	2.29087	0.960184	-0.0905041	1.07211	unknown
AACCGA	TCGGTT	24	24.599	6.61222	0.975649	-0.0905899	1.07218	unknown
TCGCGG	CCGCGA	3	3.16233	1.77211	0.948667	-0.0916047	1.07299	unknown
GTGTCC	GGACAC	8	8.266	2.89172	0.96782	-0.0919868	1.07329	unknown
CGGGCG	CGCCCG	1	1.103	1.10701	0.906618	-0.0930436	1.07413	unknown
TAGACC	GGTCTA	12	12.33	3.50379	0.973236	-0.0941838	1.07504	unknown
CCGACT	AGTCGG	6	6.23167	2.45629	0.962824	-0.0943158	1.07514	DRE
CTAAGA	TCTTAG	24	24.4593	4.86699	0.981221	-0.0943773	1.07519	unknown
AACGCT	AGCGTT	10	10.302	3.17419	0.970685	-0.0951424	1.0758	unknown
CTGGGT	ACCCAG	6	6.248	2.60168	0.960307	-0.0953229	1.07594	unknown
GGTTGC	GCAACC	10	10.3253	3.38191	0.968492	-0.0961982	1.07664	unknown
GCACTT	AAGTGC	10	10.3147	3.26801	0.969493	-0.096287	1.07671	unknown
GATACC	GGTATC	10	10.322	3.34026	0.968804	-0.0963995	1.0768	unknown
GCGTGT	ACACGC	7	7.26467	2.73187	0.963568	-0.0968812	1.07718	CE3
GCGGTG	CACCGC	6	6.26467	2.70969	0.957752	-0.0976743	1.07781	unknown
TCTCGT	ACGAGA	18	18.4313	4.36764	0.976598	-0.0987565	1.07867	unknown
TGCACC	GGTGCA	8	8.30067	3.04215	0.963778	-0.0988336	1.07873	unknown
GAGCAA	TTGCTC	22	22.486	4.8539	0.978387	-0.100126	1.07976	unknown
CAATAA	TTATTG	63	63.8473	8.40902	0.986729	-0.100765	1.08026	unknown
GTATCT	AGATAC	21	21.459	4.539	0.97861	-0.101124	1.08055	unknown
GTCATG	CATGAC	17	17.4177	4.11706	0.976021	-0.101448	1.0808	unknown
TGATAC	GTATCA	22	22.4947	4.8345	0.97801	-0.10232	1.0815	unknown
GAACTT	AAGTTC	28	28.5603	5.4169	0.980381	-0.103442	1.08239	unknown
TGCCTG	CAGGCA	5	5.24867	2.36827	0.952623	-0.104999	1.08362	unknown
TGGGGT	ACCCCA	10	10.335	3.17891	0.967586	-0.105382	1.08393	unknown
GGCGTT	AACGCC	7	7.29733	2.81322	0.959255	-0.105691	1.08417	unknown
CAACTA	TAGTTG	30	30.598	5.64698	0.980456	-0.105897	1.08434	unknown
CTTCCA	TGGAAG	28	28.6197	5.83847	0.978348	-0.106135	1.08452	unknown
AGTATG	CATACT	18	18.4473	4.19449	0.975751	-0.106648	1.08493	unknown
ACTAAA	TTTAGT	69	70.0297	9.58805	0.985297	-0.107391	1.08552	unknown
TGGTAC	GTACCA	13	13.404	3.75333	0.96986	-0.107638	1.08572	unknown
CTCGAT	ATCGAG	13	13.39	3.5992	0.970874	-0.108358	1.08629	unknown
TCCATG	CATGGA	22	22.5327	4.88442	0.97636	-0.109054	1.08684	unknown
AATCCG	CGGATT	16	16.434	3.97923	0.973591	-0.109066	1.08685	unknown
AGGTTT	AAACCT	36	36.662	6.0062	0.981943	-0.110219	1.08776	unknown
CCTTAC	GTAAGG	11	11.3857	3.43989	0.966127	-0.112116	1.08927	unknown
CAGAGC	GCTCTG	13	13.5187	4.59122	0.961633	-0.112969	1.08994	unknown
AATCGT	ACGATT	21	21.5287	4.64669	0.975444	-0.113773	1.09058	unknown
CCCGGA	TCCGGG	4	4.239	2.09492	0.943619	-0.114086	1.09083	unknown
TAATGT	ACATTA	50	50.8537	7.41723	0.983213	-0.115092	1.09163	unknown
CAAGTG	CACTTG	22	22.55	4.75146	0.97561	-0.115754	1.09215	unknown
TGTGCC	GGCACA	7	7.30967	2.65985	0.957636	-0.116423	1.09268	unknown
AAGCGG	CCGCTT	7	7.346	2.96837	0.9529	-0.116562	1.09279	unknown
ATAAGC	GCTTAT	23	23.5947	5.08065	0.974797	-0.117045	1.09318	unknown
GCGCTT	AAGCGC	4	4.24867	2.11605	0.941472	-0.117515	1.09355	unknown
CCATCG	CGATGG	10	10.4113	3.48705	0.960492	-0.11796	1.0939	unknown
CTTGCG	CGCAAG	6	6.31767	2.67391	0.949718	-0.118802	1.09457	unknown
CTTGTC	GACAAG	22	22.5883	4.91809	0.973954	-0.119626	1.09522	unknown
TCATGT	ACATGA	35	35.7027	5.87303	0.980319	-0.119643	1.09523	unknown
GCGCTG	CAGCGC	2	2.18133	1.49662	0.91687	-0.121162	1.09644	unknown
TCCGTG	CACGGA	6	6.309	2.54762	0.951022	-0.12129	1.09654	unknown
TCTAAT	ATTAGA	50	50.9767	8.04403	0.980841	-0.121415	1.09664	unknown
GAGTGC	GCACTC	5	5.272	2.23451	0.948407	-0.121727	1.09688	unknown
CACGAT	ATCGTG	11	11.4173	3.41854	0.963447	-0.12208	1.09716	unknown
AGGCAC	GTGCCT	6	6.308	2.47989	0.951173	-0.124199	1.09884	unknown
CCGAGT	ACTCGG	7	7.337	2.70836	0.954068	-0.12443	1.09902	unknown
ATGAAC	GTTCAT	30	30.707	5.64356	0.976976	-0.125276	1.09969	unknown
GGGAAT	ATTCCC	15	15.555	4.39015	0.96432	-0.126419	1.1006	unknown
AGAACT	AGTTCT	26	26.661	5.17052	0.975207	-0.12784	1.10172	unknown
CAGAGA	TCTCTG	38	39.02	7.9589	0.97386	-0.128158	1.10198	unknown
CGCGTC	GACGCG	4	4.27133	2.07826	0.936476	-0.130558	1.10388	CE3/hex3
GTTCAT	ATGAAC	28	28.7087	5.40014	0.975315	-0.131231	1.10441	unknown
ATCGCA	TGCGAT	10	10.4473	3.39623	0.957182	-0.131715	1.10479	unknown
TATGCT	AGCATA	20	20.618	4.68338	0.970026	-0.131956	1.10498	unknown
ATATCG	CGATAT	17	17.5713	4.31877	0.967485	-0.132291	1.10525	unknown
AGTCTA	TAGACT	18	18.5853	4.413	0.968506	-0.132639	1.10552	unknown
GTCGCC	GGCGAC	5	5.32433	2.4384	0.939085	-0.133011	1.10582	unknown
AGAGCG	CGCTCT	8	8.38933	2.92688	0.953592	-0.13302	1.10582	unknown
CACGAA	TTCGTG	16	16.5327	3.98592	0.967781	-0.133637	1.10631	unknown
AGACGG	CCGTCT	9	9.498	3.72567	0.947568	-0.133667	1.10633	unknown
CCGATT	AATCGG	14	14.5137	3.82675	0.964608	-0.13423	1.10678	unknown
CAACCG	CGGTTG	9	9.43667	3.24019	0.953727	-0.134766	1.1072	unknown
TATGAG	CTCATA	24	24.694	5.14048	0.971896	-0.135007	1.10739	unknown
CTTTAT	ATAAAG	55	56.0767	7.87808	0.9808	-0.136666	1.10871	unknown
TTGCAA	TTGCAA	39	39.87	6.36149	0.978179	-0.13676	1.10878	unknown
AGAGGT	ACCTCT	18	18.6373	4.65256	0.965803	-0.136985	1.10896	unknown
GTGAAC	GTTCAC	16	16.5663	4.10007	0.965814	-0.138128	1.10986	unknown
TTAGCT	AGCTAA	29	29.7483	5.39574	0.974845	-0.13869	1.1103	unknown
TAACCC	GGGTTA	14	14.53	3.7941	0.963524	-0.13969	1.1111	unknown
AGCACA	TGTGCT	15	15.544	3.88464	0.965003	-0.140039	1.11137	unknown
CTACTT	AAGTAG	27	27.7513	5.33826	0.972926	-0.140745	1.11193	unknown
CAAACC	GGTTTG	36	36.933	6.56746	0.974738	-0.142064	1.11297	unknown
CCTGCT	AGCAGG	6	6.37467	2.63412	0.941226	-0.142236	1.11311	unknown
ATCTCT	AGAGAT	54	55.0713	7.51095	0.980546	-0.142636	1.11342	unknown
AATAGG	CCTATT	16	16.5817	4.0399	0.964921	-0.143981	1.11448	unknown
GGATCG	CGATCC	9	9.48367	3.35343	0.949	-0.144231	1.11468	unknown
GGGTGT	ACACCC	6	6.37533	2.57488	0.941127	-0.145767	1.11589	unknown
CTAAAT	ATTTAG	52	53.1423	7.82955	0.978504	-0.1459	1.116	unknown
CAGGAT	ATCCTG	10	10.513	3.50284	0.951203	-0.146452	1.11644	unknown
GTACTA	TAGTAC	16	16.6177	4.21182	0.962831	-0.146651	1.11659	unknown
ACCGCG	CGCGGT	3	3.26933	1.83537	0.917618	-0.146746	1.11667	unknown
CCGCAC	GTGCGG	3	3.28233	1.92072	0.913984	-0.146993	1.11686	unknown
GGGCGA	TCGCCC	2	2.23233	1.56349	0.895924	-0.148599	1.11813	unknown
CACCGT	ACGGTG	10	10.4837	3.25135	0.953865	-0.148759	1.11826	unknown
CAGACG	CGTCTG	7	7.45967	3.06445	0.93838	-0.15	1.11924	unknown
ACCTTA	TAAGGT	20	20.6977	4.64228	0.966292	-0.150285	1.11946	unknown
CAAATC	GATTTG	58	59.1777	7.80908	0.980099	-0.150807	1.11987	unknown
GGTTCA	TGAACC	21	21.7687	5.07803	0.964689	-0.151371	1.12032	unknown
TGCGCT	AGCGCA	3	3.29	1.89836	0.911854	-0.152763	1.12142	unknown
TGCAAC	GTTGCA	19	19.7253	4.73533	0.963228	-0.153175	1.12174	unknown
TTATTA	TAATAA	102	103.975	12.7881	0.981005	-0.15444	1.12274	unknown
GTGCTA	TAGCAC	8	8.45233	2.90411	0.946484	-0.155756	1.12377	unknown
CATCAA	TTGATG	48	49.1407	7.27107	0.976788	-0.156877	1.12466	unknown
TTTCAA	TTGAAA	90	91.6087	10.2174	0.98244	-0.157444	1.1251	ERE
GATGAT	ATCATC	49	50.3087	8.29524	0.973987	-0.157761	1.12536	unknown
CATGCT	AGCATG	13	13.5857	3.70638	0.956891	-0.158016	1.12556	unknown
AGTCAA	TTGACT	38	39.087	6.8496	0.97219	-0.158695	1.12609	WB box
TCAAAA	TTTTGA	110	112.122	13.344	0.981074	-0.159023	1.12635	unknown
CAGAAT	ATTCTG	26	26.8503	5.33517	0.968331	-0.159382	1.12663	unknown
TCCCGG	CCGGGA	5	5.38767	2.42515	0.928046	-0.159853	1.127	unknown
GCGCCA	TGGCGC	4	4.34233	2.13713	0.921164	-0.160184	1.12726	unknown
ATTTCG	CGAAAT	27	27.8653	5.38661	0.968946	-0.160645	1.12763	unknown
TCTTAA	TTAAGA	59	60.319	8.16971	0.978133	-0.16145	1.12826	unknown
TTTCCA	TGGAAA	50	51.152	7.11902	0.977479	-0.16182	1.12855	unknown
CCAGAA	TTCTGG	21	21.8077	4.96429	0.962964	-0.162695	1.12924	unknown
TAGCCT	AGGCTA	10	10.5383	3.30194	0.948917	-0.163035	1.12951	unknown
ACAGAC	GTCTGT	13	13.6113	3.74499	0.955086	-0.16324	1.12967	unknown
TGCGTA	TACGCA	8	8.47033	2.88049	0.944473	-0.163282	1.1297	unknown
TCCGCT	AGCGGA	5	5.40233	2.46004	0.925526	-0.163547	1.12991	unknown
ACCCGA	TCGGGT	9	9.725	4.38867	0.92545	-0.165198	1.13121	unknown
TTCTTT	AAAGAA	132	134.178	13.1145	0.983765	-0.166101	1.13192	unknown
TAGGAT	ATCCTA	18	18.718	4.3031	0.961641	-0.166857	1.13252	unknown
CACAAC	GTTGTG	25	25.9457	5.64063	0.963552	-0.167653	1.13314	unknown
GAGAAC	GTTCTC	21	21.8133	4.79508	0.962714	-0.169618	1.13469	unknown
CCTTAA	TTAAGG	25	25.8623	5.05047	0.966657	-0.170743	1.13557	unknown
GGAATG	CATTCC	16	16.7477	4.36895	0.955357	-0.171132	1.13588	unknown
GGATTA	TAATCC	22	22.8277	4.83485	0.963743	-0.171188	1.13592	unknown
GATCCT	AGGATC	14	14.6967	4.05185	0.952597	-0.171938	1.13651	unknown
ACACCG	CGGTGT	7	7.47533	2.76429	0.936413	-0.171955	1.13653	unknown
ACCAGC	GCTGGT	9	9.556	3.23218	0.941817	-0.17202	1.13658	unknown
CTCGGT	ACCGAG	8	8.52533	3.05141	0.93838	-0.172161	1.13669	DRE1
CCTTCT	AGAAGG	26	26.9447	5.47408	0.96494	-0.172571	1.13701	unknown
ACCTCA	TGAGGT	16	16.7277	4.21087	0.956499	-0.172807	1.1372	unknown
ACCCAG	CTGGGT	6	6.46033	2.65143	0.928745	-0.173617	1.13783	unknown
AGTCGT	ACGACT	11	11.613	3.52714	0.947214	-0.173795	1.13797	unknown
CGTGGC	GCCACG	9	9.55933	3.21059	0.941488	-0.174215	1.1383	ABRE/hex3
TCTTAC	GTAAGA	28	28.947	5.429	0.967285	-0.174434	1.13848	unknown
TCGTGG	CCACGA	9	9.54	3.09067	0.943396	-0.174719	1.1387	unknown
GGTGAA	TTCACC	23	23.8837	5.05536	0.963001	-0.174798	1.13876	unknown
TTAGCC	GGCTAA	14	14.708	4.05013	0.951863	-0.174809	1.13877	unknown
ATACCG	CGGTAT	8	8.50667	2.87994	0.940439	-0.17593	1.13965	unknown
GACCTC	GAGGTC	7	7.48	2.7279	0.935829	-0.17596	1.13967	unknown
GGCCAG	CTGGCC	4	4.37967	2.14283	0.913312	-0.17718	1.14063	unknown
GCGAAC	GTTCGC	4	4.381	2.13651	0.913034	-0.178328	1.14153	unknown
AGAATT	AATTCT	54	55.4553	8.15317	0.973757	-0.178499	1.14167	unknown
CTTGAT	ATCAAG	32	33.037	5.75697	0.968611	-0.18013	1.14295	unknown
GAAAAC	GTTTTC	60	61.402	7.7804	0.977167	-0.180196	1.143	unknown
AAGTAA	TTACTT	61	62.5157	8.31646	0.975755	-0.182249	1.14461	unknown
GCTGGC	GCCAGC	4	4.40167	2.20059	0.908747	-0.182527	1.14483	unknown
AATGCA	TGCATT	31	32.089	5.82464	0.966063	-0.186964	1.14831	L1 box
CGACTG	CAGTCG	5	5.42933	2.28956	0.920923	-0.187518	1.14875	unknown
CTTTGA	TCAAAG	45	46.361	7.22593	0.970643	-0.188349	1.1494	unknown
CAGACC	GGTCTG	8	8.57367	3.02164	0.93309	-0.189853	1.15058	unknown
TTAATC	GATTAA	47	48.3507	7.05424	0.972065	-0.191469	1.15184	unknown
GGGCTC	GAGCCC	5	5.46467	2.42516	0.914969	-0.191603	1.15195	unknown
CAATAC	GTATTG	22	22.935	4.86635	0.959233	-0.192136	1.15236	unknown
CTCTAG	CTAGAG	14	14.758	3.93378	0.948638	-0.19269	1.1528	unknown
TTTTGA	TCAAAA	101	103.46	12.7602	0.97622	-0.192813	1.15289	unknown
GCGGTC	GACCGC	3	3.37867	1.95905	0.887924	-0.193291	1.15327	unknown
TGTTGG	CCAACA	27	28.1003	5.65092	0.960843	-0.194718	1.15439	unknown
TGACTC	GAGTCA	17	17.7917	4.04612	0.955504	-0.195661	1.15512	GCN4 motif
TATTAG	CTAATA	36	37.2517	6.39223	0.9664	-0.195811	1.15524	cytokinin-enhanced binding
GGCGAC	GTCGCC	4	4.41733	2.11833	0.905524	-0.19701	1.15618	unknown
AGCTTT	AAAGCT	41	42.3523	6.85273	0.968069	-0.197342	1.15644	unknown
GATTCC	GGAATC	20	20.9897	4.99525	0.95285	-0.198121	1.15705	unknown
ACCAGG	CCTGGT	6	6.54967	2.76817	0.916077	-0.198567	1.1574	unknown
[truncated: 2,098 more rows]
